# Supplementary material
Source: publisher figshare collection journal article supplement (https://acs.figshare.com/ndownloader/files/3962650)
Supplement: Supplementary file 1 [file 3962650]

## Supporting Information

### DDQ-Mediated Oxidative Coupling: An Approach to 2,3-Dicyanofuran (Thiophene)

*Zheng-Lin Wang,<sup>†</sup> Hong-Liang Li,<sup>†</sup> Li-Shi Ge,<sup>†</sup> Xing-Lan An,<sup>†</sup> Zi-Gang Zhang,<sup>†</sup>  
Xiaoyan Luo,<sup>\*,†</sup> John S. Fossey<sup>†,‡</sup> and Wei-Ping Deng<sup>\*,†</sup>*

<sup>†</sup>Shanghai Key Laboratory of New Drug Design & School of Pharmacy, East China University of Science and Technology, 130 Meilong Road, Shanghai 200237, China, <sup>‡</sup>School of Chemistry, University of Birmingham, Edgbaston, Birmingham, B15 2TT, England, UK.

*weiping\_deng@ecust.edu.cn; xyluo@ecust.edu.cn*

#### Table of Contents

|                                                                           |            |
|---------------------------------------------------------------------------|------------|
| <b>1. General information.....</b>                                        | <b>S1</b>  |
| <b>2. Procedure for radical trapping experiments.....</b>                 | <b>S1</b>  |
| <b>3. Procedure for EPR experiments.....</b>                              | <b>S2</b>  |
| <b>4. Procedure for NMR experiments.....</b>                              | <b>S3</b>  |
| <b>5. X-Ray structure of 4k, 8j and 9 and the corresponding data.....</b> | <b>S59</b> |

## 1. General information

**Melting points** were obtained in open capillary tubes using a micro melting point apparatus which were uncorrected.

**Mass spectra** were recorded on TOF mass spectrometer.

**$^1\text{H}$  nuclear magnetic resonance (NMR)** spectra were recorded using  $\text{CDCl}_3$  ( $\delta = 7.26$  ppm),  $(\text{CD}_3)_2\text{SO}$  ( $\delta = 2.50$  ppm) and  $\text{CD}_3\text{CN}$  ( $\delta = 1.94$  ppm) as solvent at ambient temperature on the 400 MHz spectrometer. Data are presented as follows: Chemical shift (in ppm), integration, multiplicity (s = singlet, d = doublet, t = triplet, q = quartet and m = multiplet), coupling constant (J/Hz) and interpretation.  **$^{13}\text{C}$  NMR** spectra were recorded by broadband spin decoupling for  $\text{CDCl}_3$  ( $\delta = 77.2$  ppm),  $(\text{CD}_3)_2\text{SO}$  ( $\delta = 39.5$  ppm) and  $\text{CD}_3\text{CN}$  ( $\delta = 118.3$  ppm) at ambient temperatures on 100 MHz spectrometer. Chemical shift values are reported in ppm on the scale.

**Infrared spectra** were recorded as thin film. Resonance frequencies are given in wave numbers ( $\text{cm}^{-1}$ ).

**TLC** (Thin layer chromatograms) was performed using commercially prepared 100-400 mesh silica gel plates, and visualisation was effected at 254 or 365 nm.

Unless otherwise noted, all reagents and solvents were used as purchased. Acetonitrile was dried and distilled from calcium hydride under nitrogen. Toluene and tetrahydrofuran were dried and distilled from sodium/benzophenone under nitrogen. 3-oxo-3-phenylpropanenitrile,<sup>[1]</sup> 3-oxobutanenitrile,<sup>[1]</sup> *N,N*-dimethyl-3-oxo-3-phenylpropanethioamide<sup>[2]</sup> were prepared following the literature procedures.

## 2. Procedure for radical trapping experiments

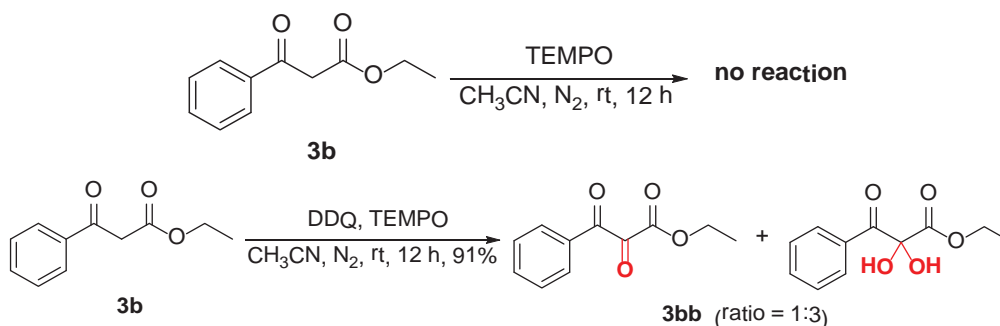

A solution of carbonyl compound **3b** (39 mg, 0.2 mmol) and TEMPO (95 mg, 0.6 mmol) in dry  $\text{CH}_3\text{CN}$  (2 mL) was treated with 2, 3-dichloro-5, 6-dicyanobenzoquinone (DDQ) (137 mg, 0.6 mmol) at room temperature under an atmosphere of  $\text{N}_2$ . Then the resulting mixture was stirred until the reaction was complete, as judged by TLC. The solvent was evaporated to dryness to give **3bb** (ratio = 1:3, determined by  $^1\text{H}$  NMR spectroscopy) as a light yellow oil in 91% yield (38 mg).

after column chromatography (100-200 mesh silica gel, petroleum ether/ethyl acetate = 5:1 as eluent). The observed characterisation data ( $^1\text{H}$  and  $^{13}\text{C}$  NMR spectra, HRMS and IR) are consistent with that previously reported in the literature.<sup>[3]</sup>

### 3. Procedure for EPR experiments<sup>[4]</sup>

#### Procedure for the investigation of the reaction between DDQ and methyl acetoacetate (**1a**) or methyl 3-(4-chlorophenyl)-3-oxopropanoate (**3h**) in $\text{CH}_3\text{CN}$ by EPR

DDQ (70.0 mg, 0.3 mmol) and methyl acetoacetate **1a** (12.0 mg, 0.1 mmol) or methyl 3-(4-chlorophenyl)-3-oxopropanoate **3h** (22.0 mg, 0.1 mmol) were dissolved in dry  $\text{CH}_3\text{CN}$  (1.0 mL). The mixture was stirred at room temperature for 30 minutes, then a 20  $\mu\text{L}$  aliquot was analysed by EPR spectroscopy at room temperature (Figure S1).

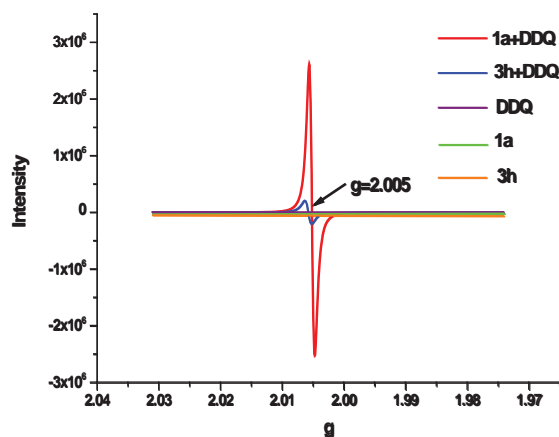

**Figure S1.** EPR spectra from the reaction between DDQ and methyl acetoacetate (**1a**) or methyl 3-(4-chlorophenyl)-3-oxopropanoate (**3h**) in  $\text{CH}_3\text{CN}$  at room temperature.

As shown in Figure S1, an authentic sample of DDQ, methyl acetoacetate **1a** or 3-(4-chlorophenyl)-3-oxopropanoate **3h** in  $\text{CH}_3\text{CN}$  were detected by EPR spectroscopy, and no signals were observed. However, when methyl acetoacetate **1a** was mixed with DDQ for 30 minutes, a strong signal with a g-factor of 2.005 was clearly detected (Figure S1, red line). This result demonstrates that DDQ reacts with methyl acetoacetate **1a** to produce a radical. To assign this signal, 3-(4-chlorophenyl)-3-oxopropanoate **3h** was subsequently reacted with DDQ instead of **1a** and examined by EPR. A signal was also observed (Figure S1, blue line), for which the g-factor was also 2.005. If this radical originated from the carbonyl compound, different g-factors should be detected when employing different carbonyl compounds. However, identical g-factors for both experiments suggested that the DDQH radical is the likely origin of the signal.<sup>[5]</sup>

#### Procedure for EPR investigation of the reaction between DDQ and methyl acetoacetate (**1a**)

in CH<sub>3</sub>CN

DDQ (70.0 mg, 0.3 mmol) and methyl acetoacetate **1a** (12.0 mg, 0.1 mmol) were dissolved in dry CH<sub>3</sub>CN (1.0 mL), the mixture was stirred at room temperature for a few minutes, then a 20  $\mu$ L aliquot was analysed at room temperature by EPR (Figure S2).

The time dependency of the DDQ-mediated oxidative coupling of methyl acetoacetate **1a** was next monitored by EPR spectroscopy (Figure S2). After 30 minutes a strong signal with g-factor of 2.005 was observed, and a moderate signal was detected at 60 minutes. This agrees with the possibility that the signal gradually disappears as DDQH<sub>2</sub> and the desired product accumulates.

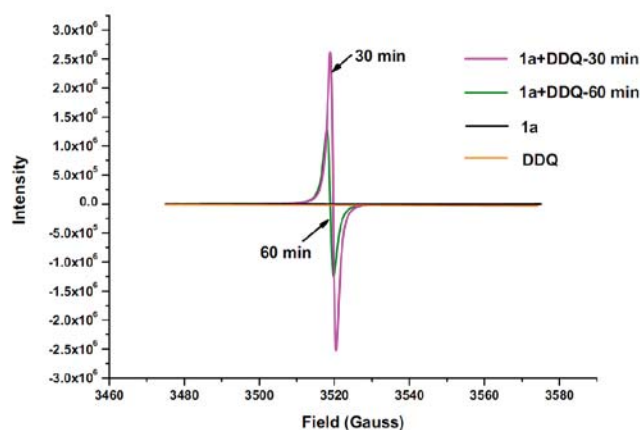

**Figure S2.** EPR spectra from the reaction between methyl acetoacetate **1a** and DDQ in CH<sub>3</sub>CN at room temperature.

#### 4. Procedure for NMR experiments

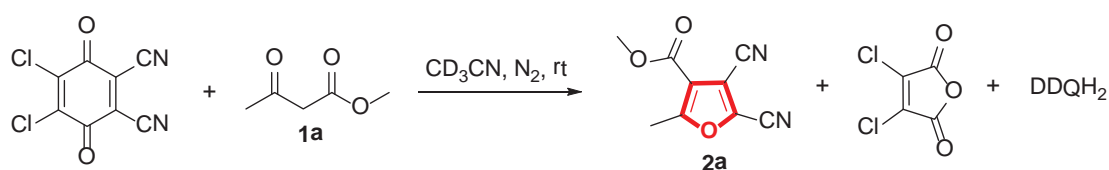

**1a** (12.0 mg, 0.1 mmol) was added to a solution of 2,3-dichloro-5,6-dicyanobenzoquinone (DDQ) (70.0 mg, 0.3 mmol) in dry CD<sub>3</sub>CN (1.0 mL) at room temperature under an atmosphere of N<sub>2</sub>. Then the resulting mixture was stirred and monitored by NMR spectroscopy with time (Figure S3-S10).

A series of *in-situ* NMR spectroscopy experiments are shown in the following figures

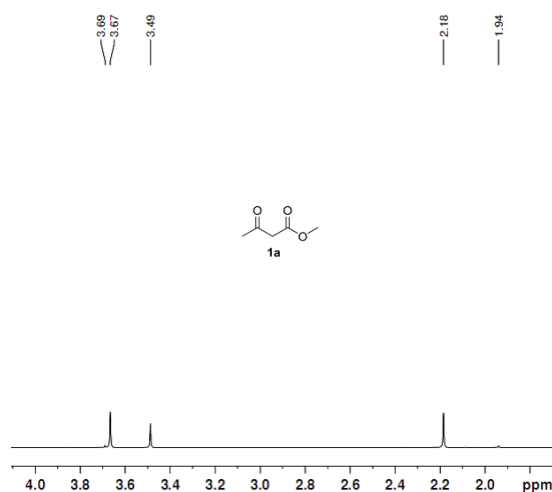

Figure S3.  $^1\text{H}$  NMR spectroscopy of **1a**.

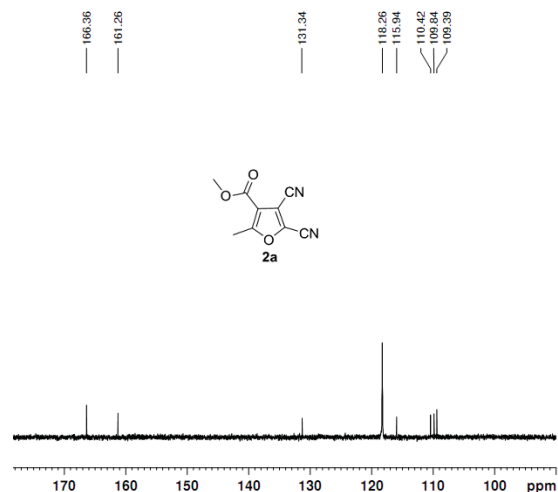

Figure S4.  $^{13}\text{C}$  NMR spectroscopy of **2a**.

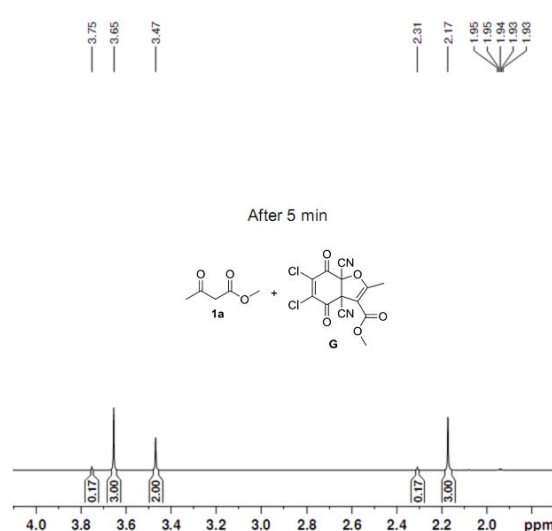

Figure S5. After 5 min.

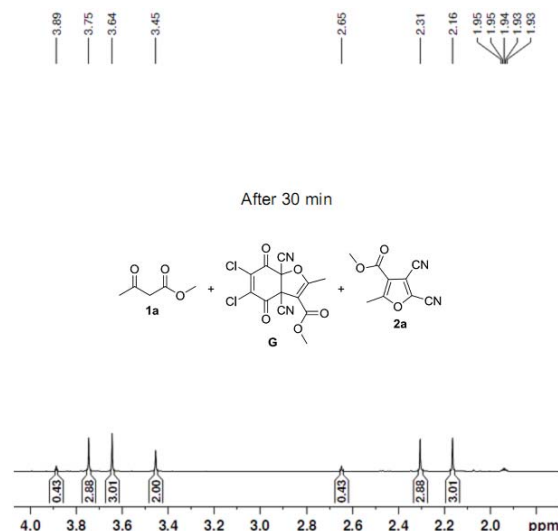

Figure S6. After 30 min.

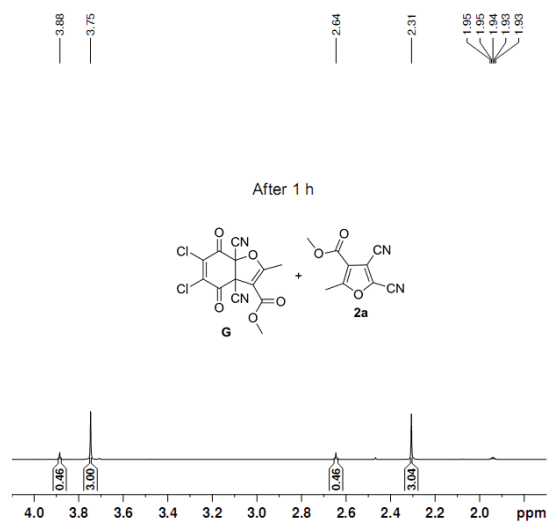

Figure S7. After 1h.

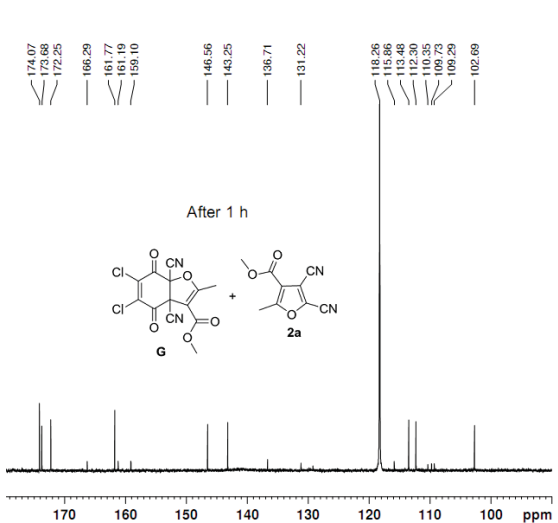

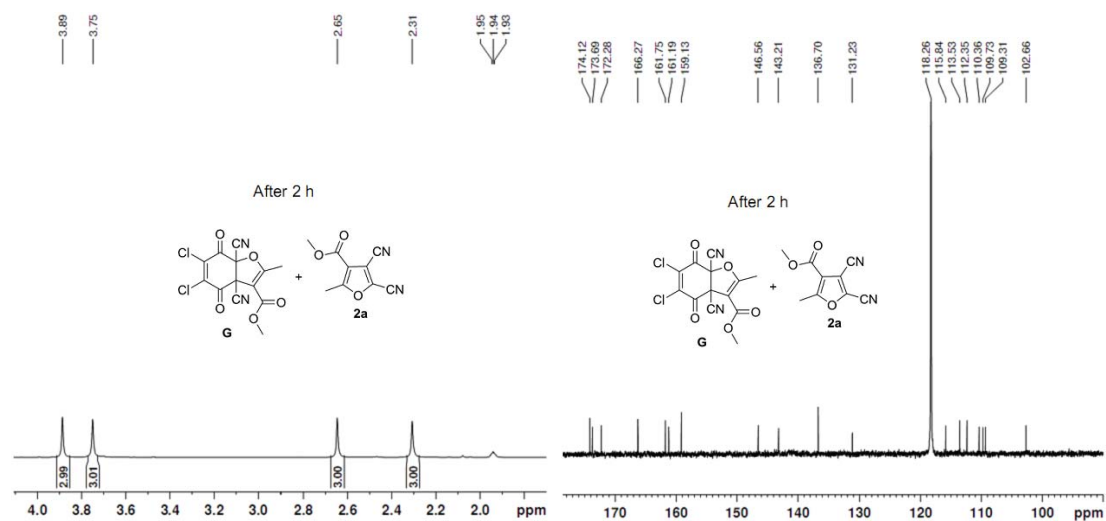

Figure S8. After 2h.

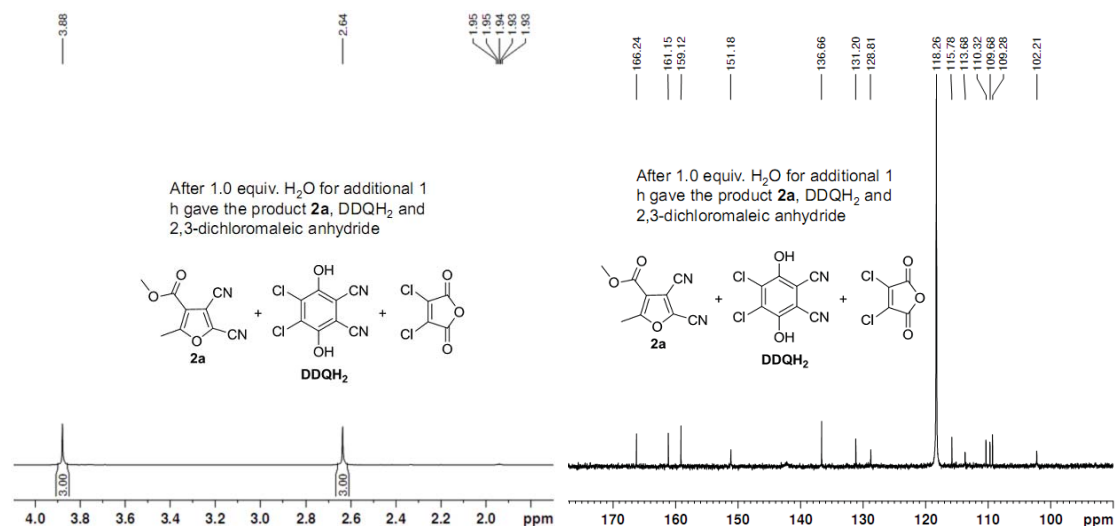

Figure S9. After 1.0 equiv. H<sub>2</sub>O for additional 1 h.

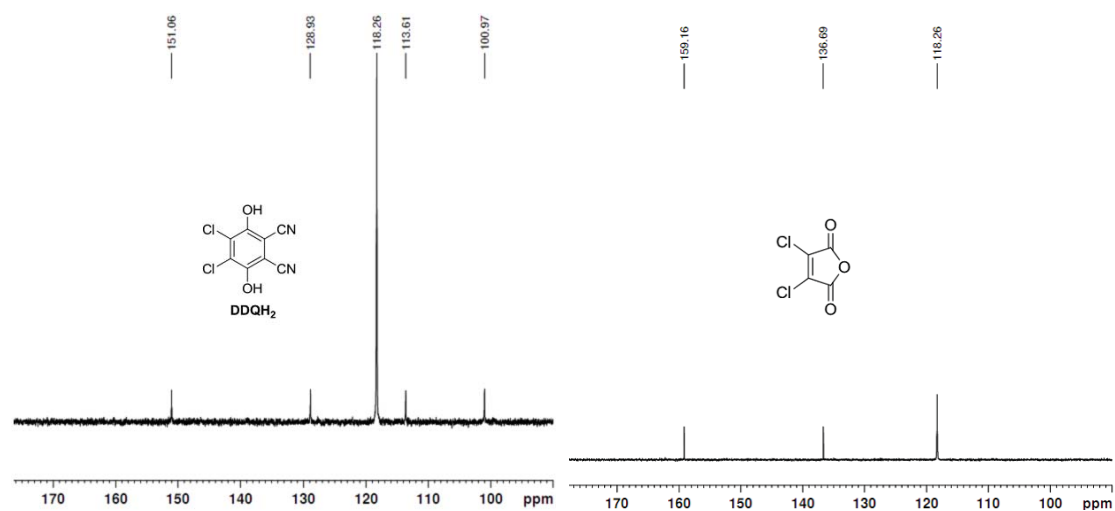

Figure S10. <sup>13</sup>C NMR spectroscopy of DDQH<sub>2</sub> and 2,3-dichloromaleic anhydride.

## References:

- [1] F. Al-Omran, M. M. A. Khalik, H. Al-Awadhi, M. H. Elnagdi, *Tetrahedron* **1996**, 52, 11915.
- [2] L. K. Ransborg, Ł. Albrecht, C. F. Weise, J. R. Bak, K. A. Jørgensen, *Org. Lett.* **2012**, 14, 724.
- [3] J. Mecinović, R. B. Hamed, C. J. Schofield, *Angew. Chem. Int. Ed.* **2009**, 48, 2796.
- [4] Z.-L. Huang, L.-Q. Jin, Y. Feng, P. Peng, H. Yi, A. Lei, *Angew. Chem. Int. Ed.* **2013**, 52, 7151-7155.
- [5] N. E. Polyakov, V. V. Konovalov, T. V. Leshina, O. A. Luzina, N. F. Salakhutdinov, T. A. Konovalova, L. D. Kispert, *J. Photochem. Photobiol. A* **2001**, 141, 117.

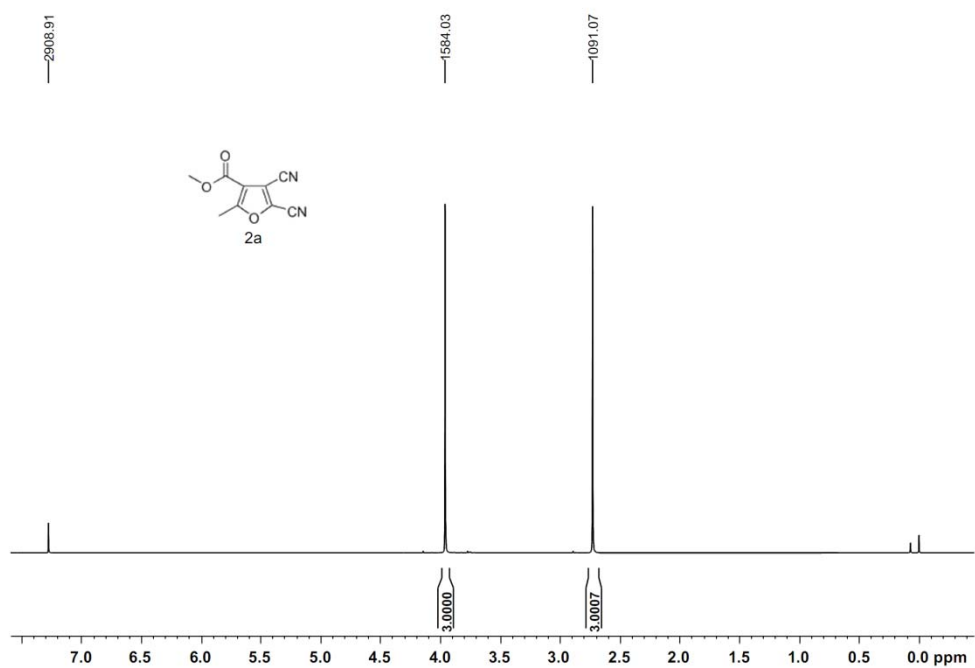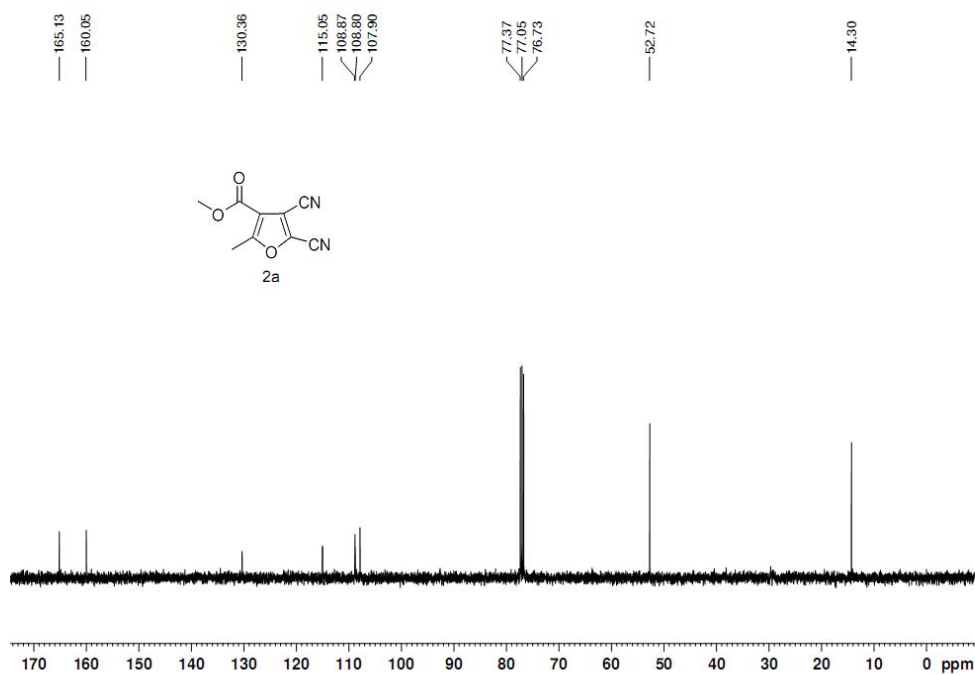

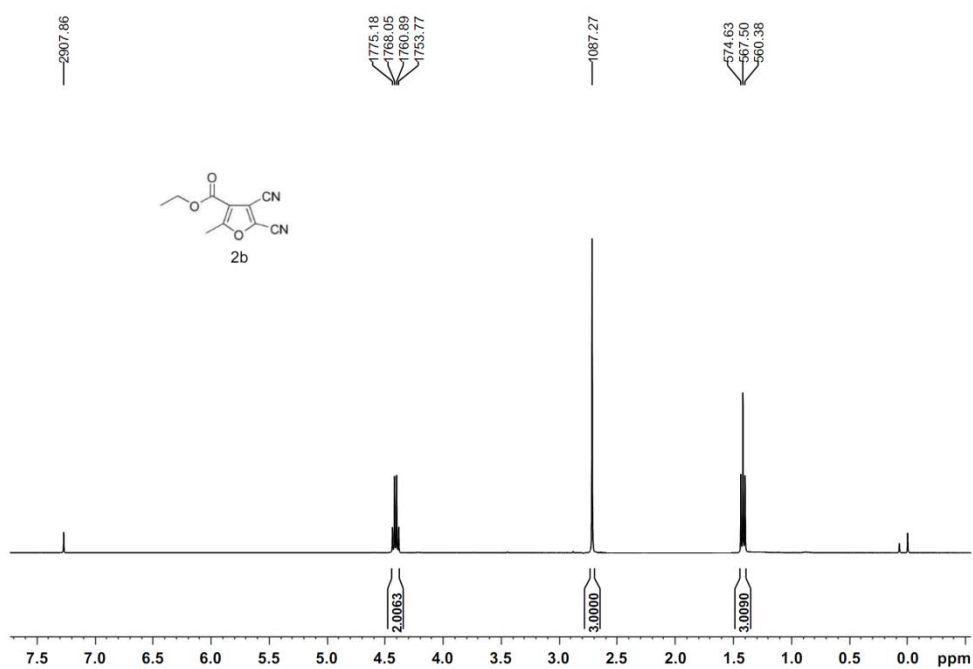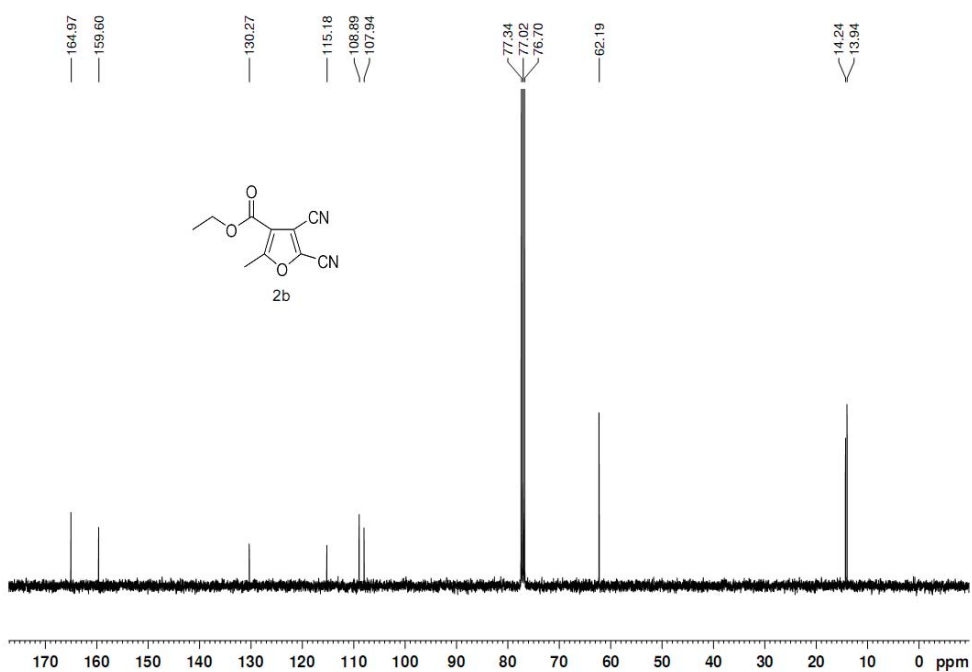

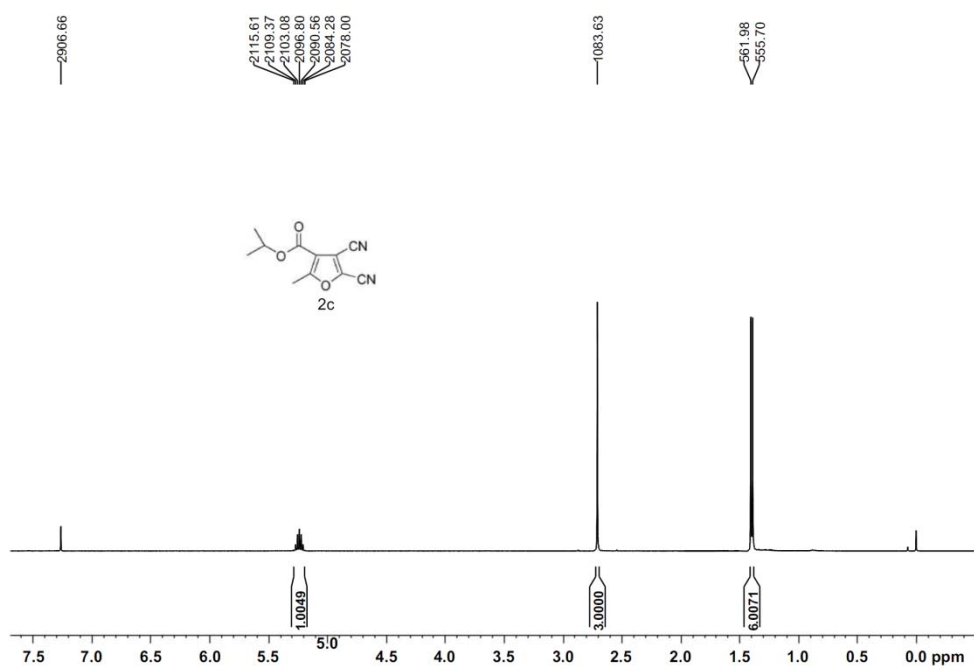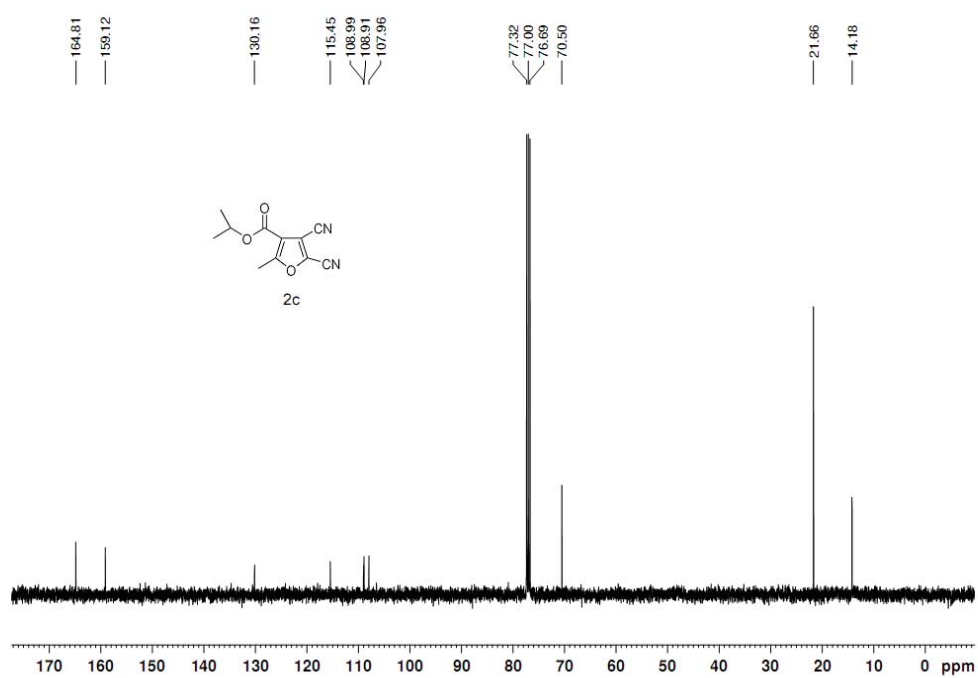

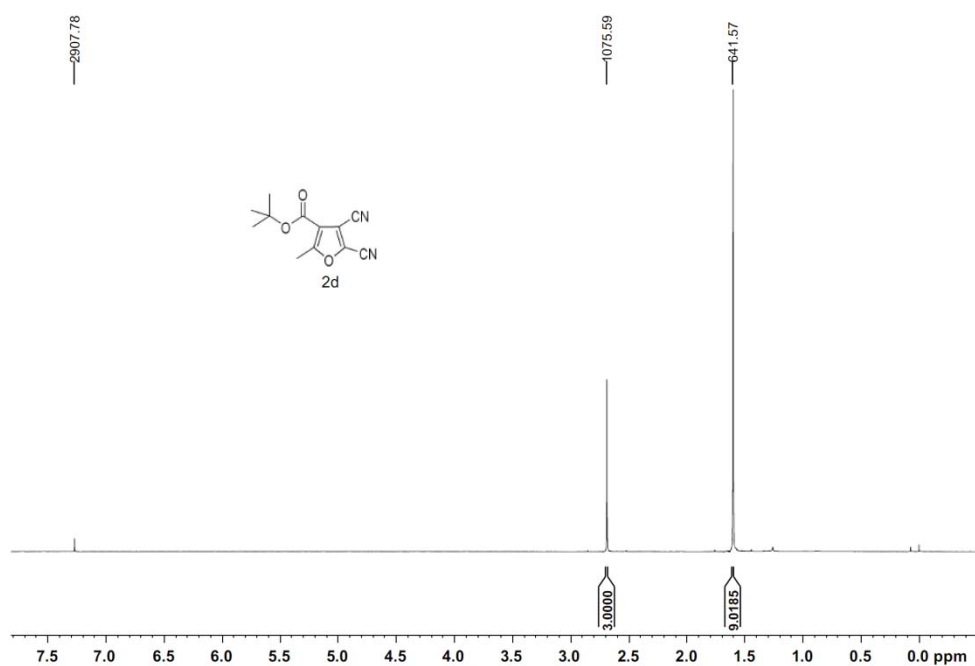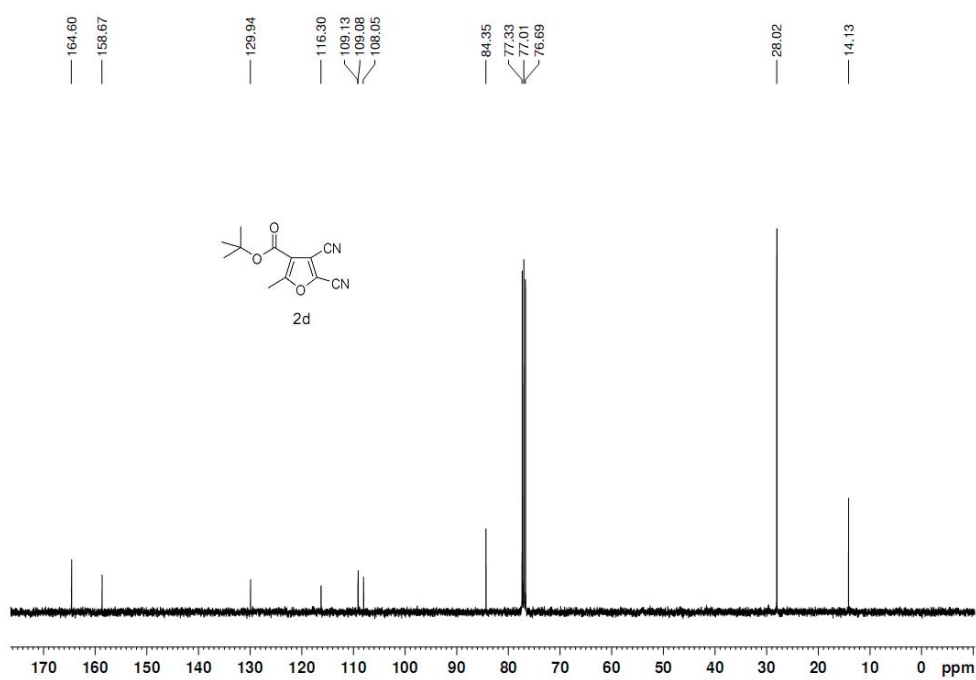

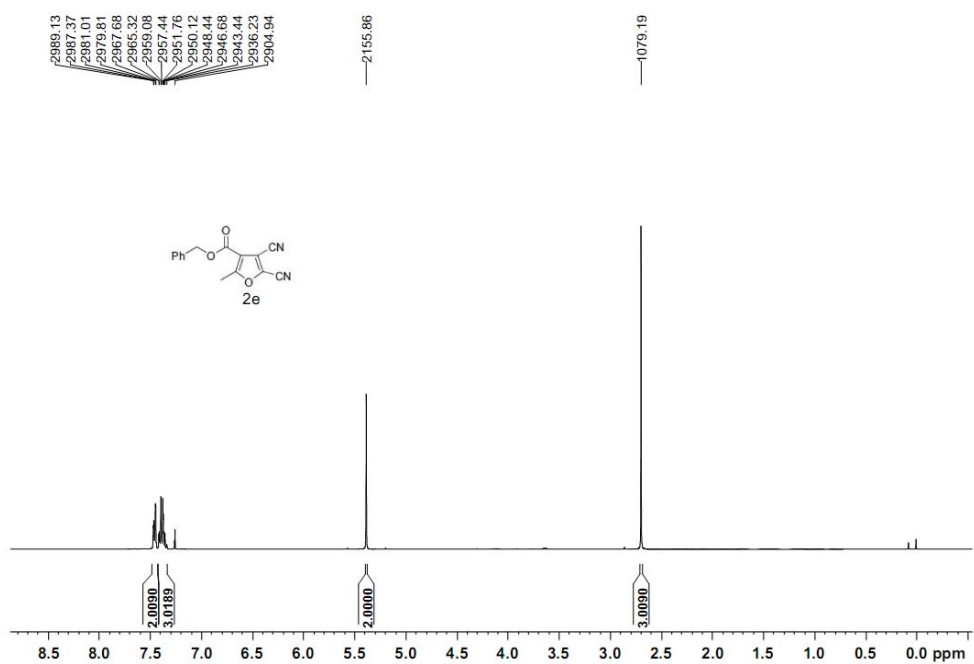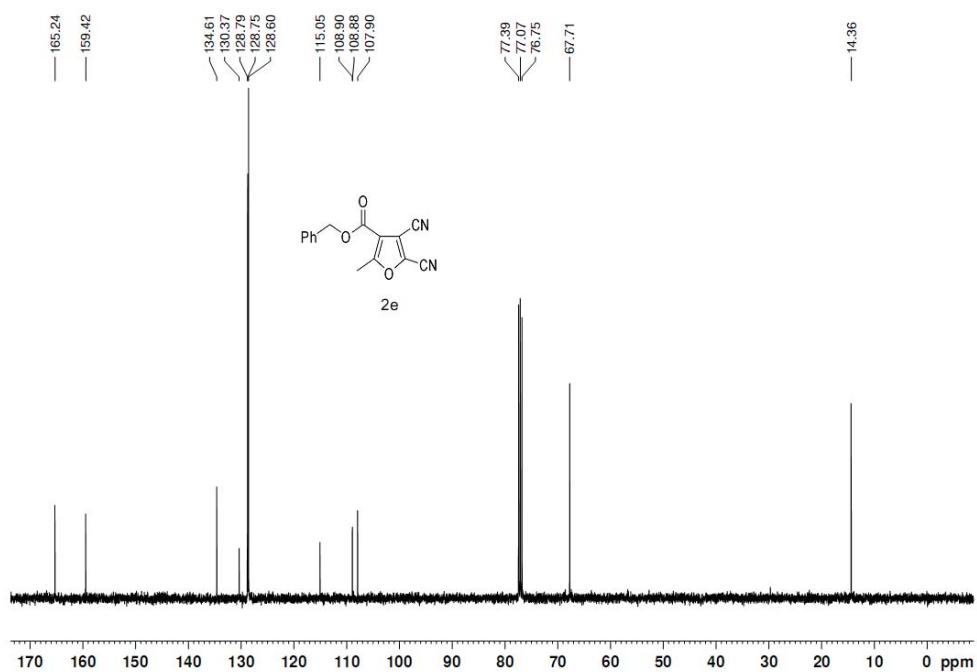

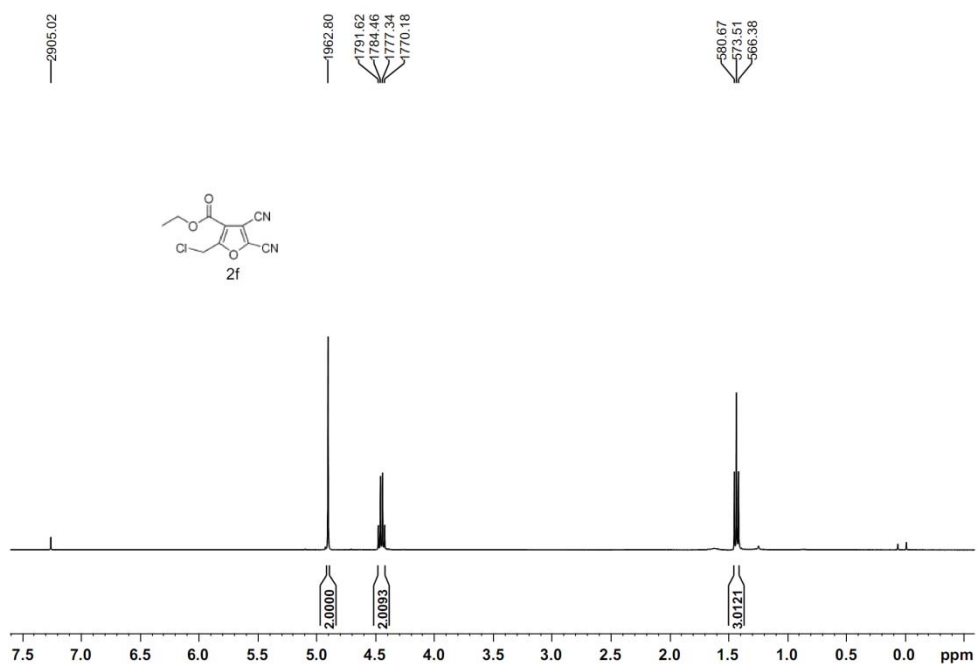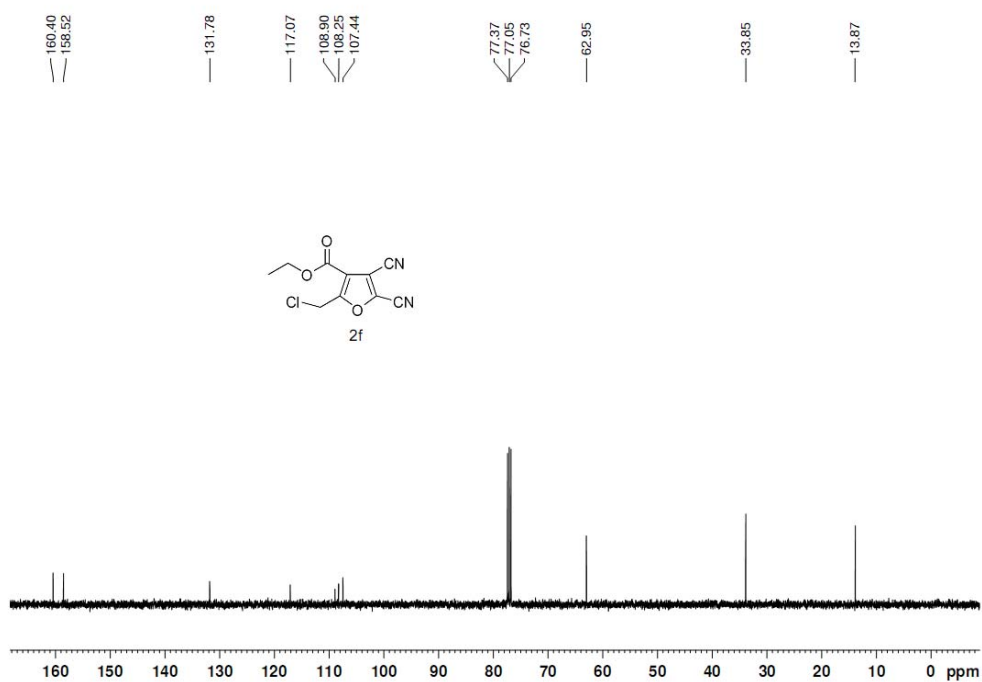

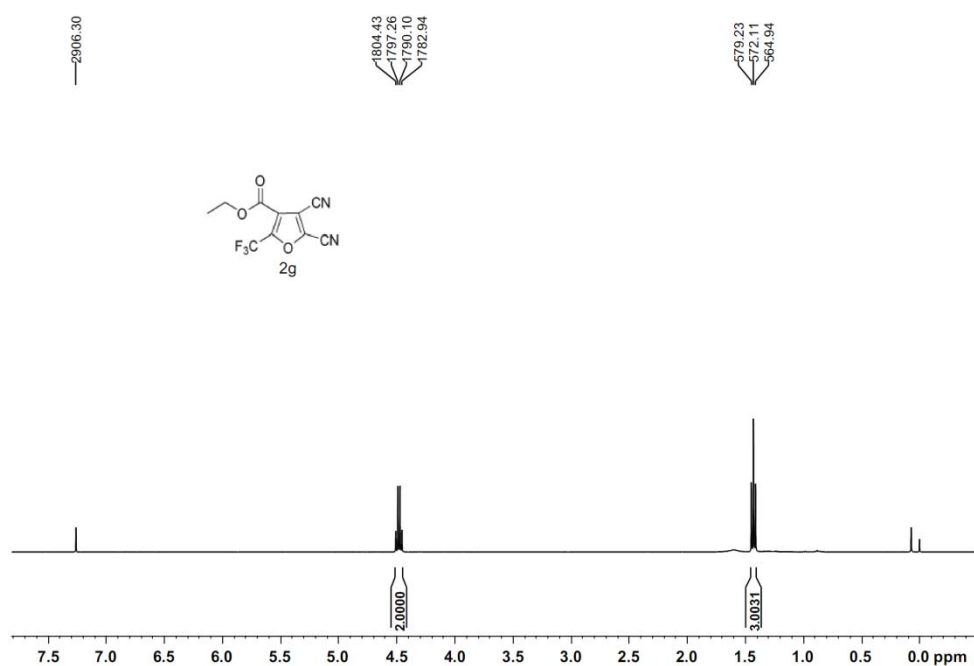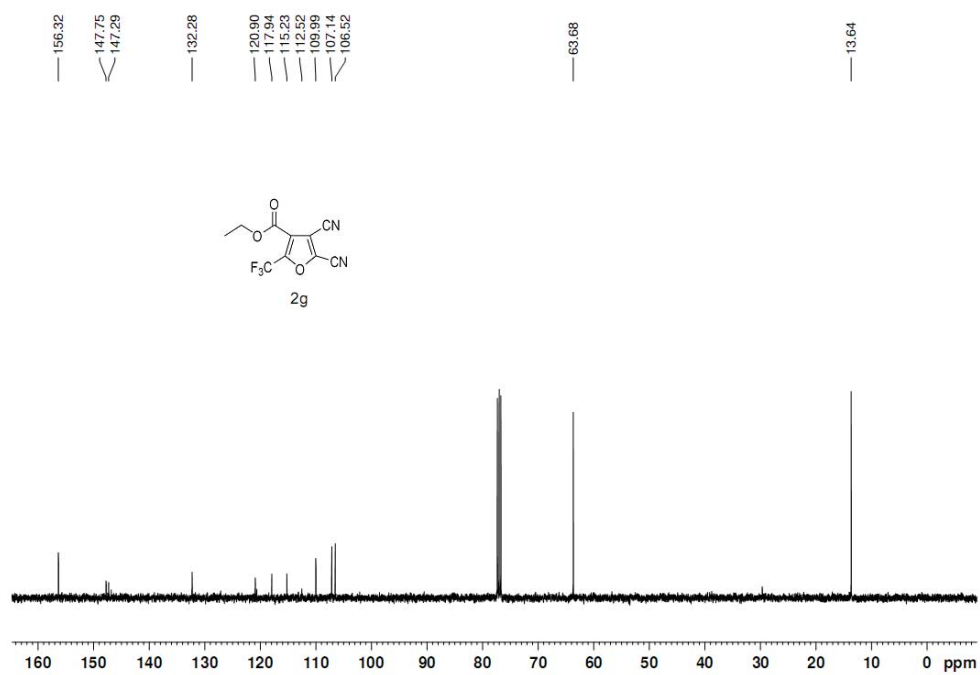

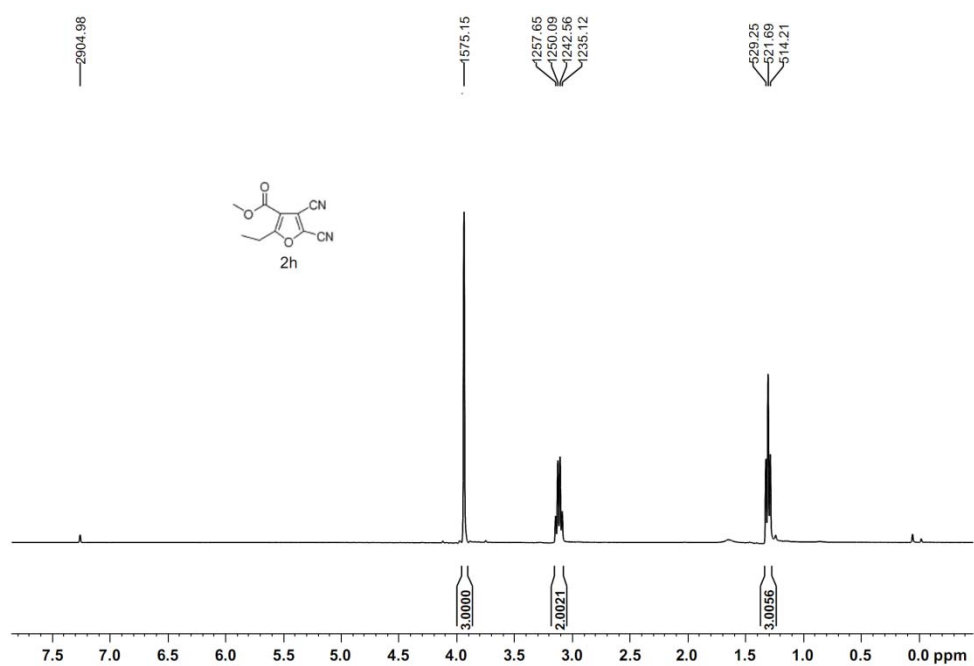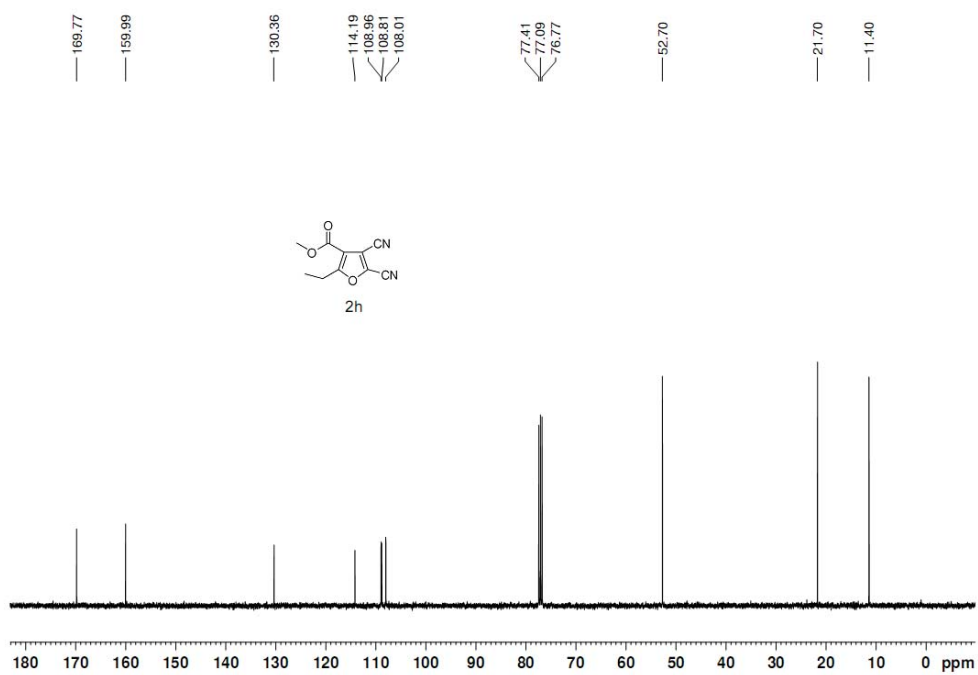

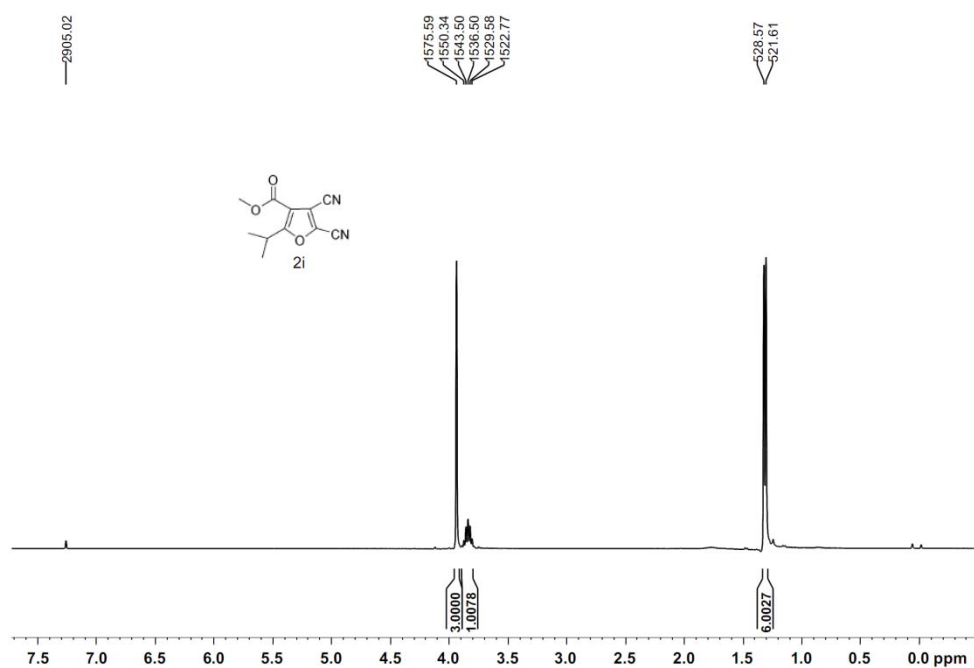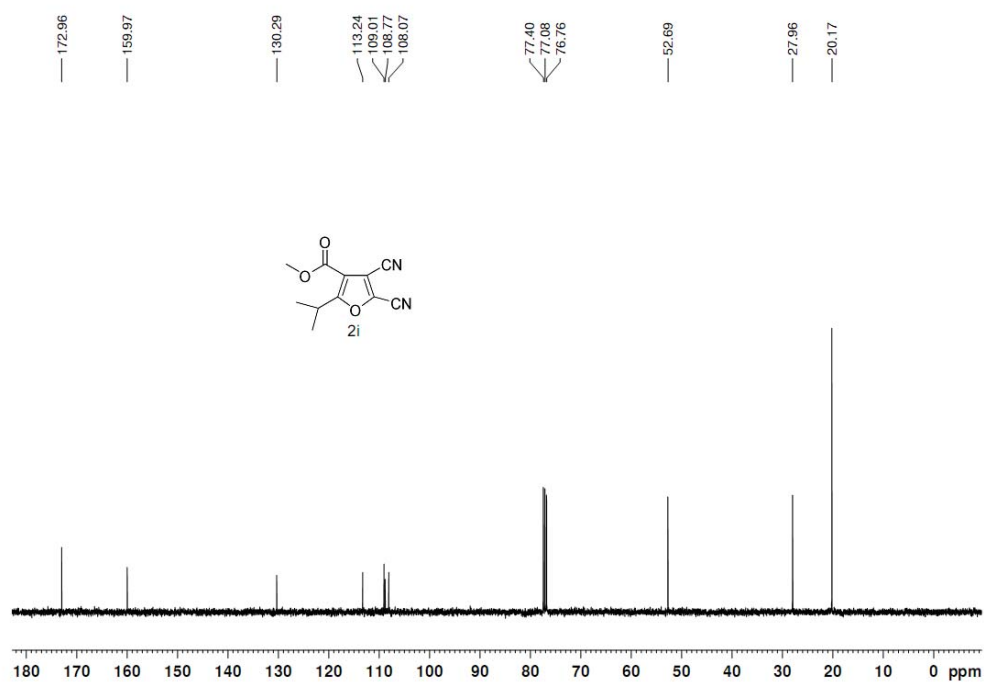

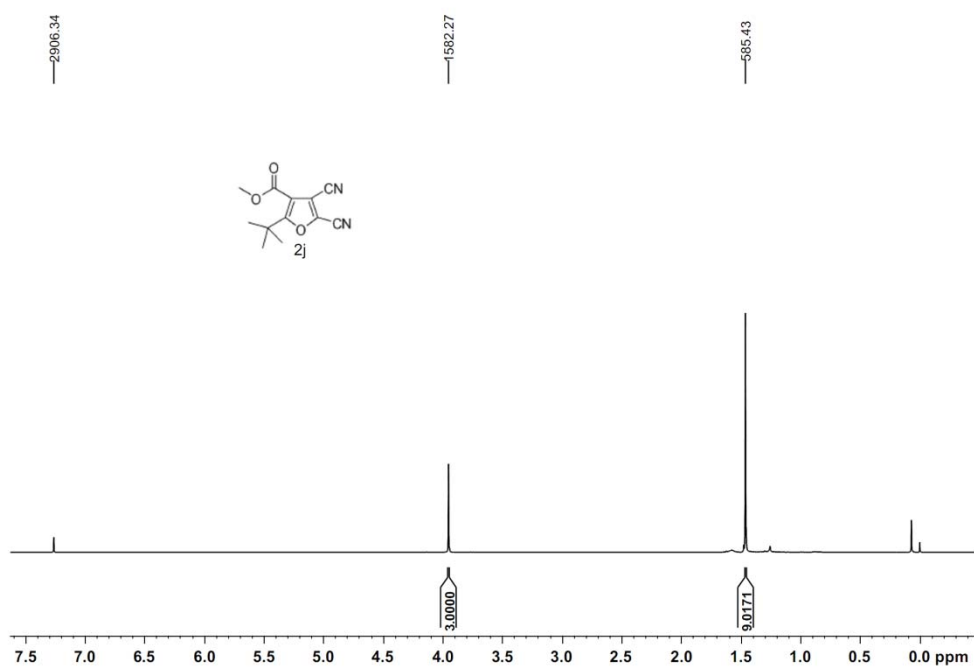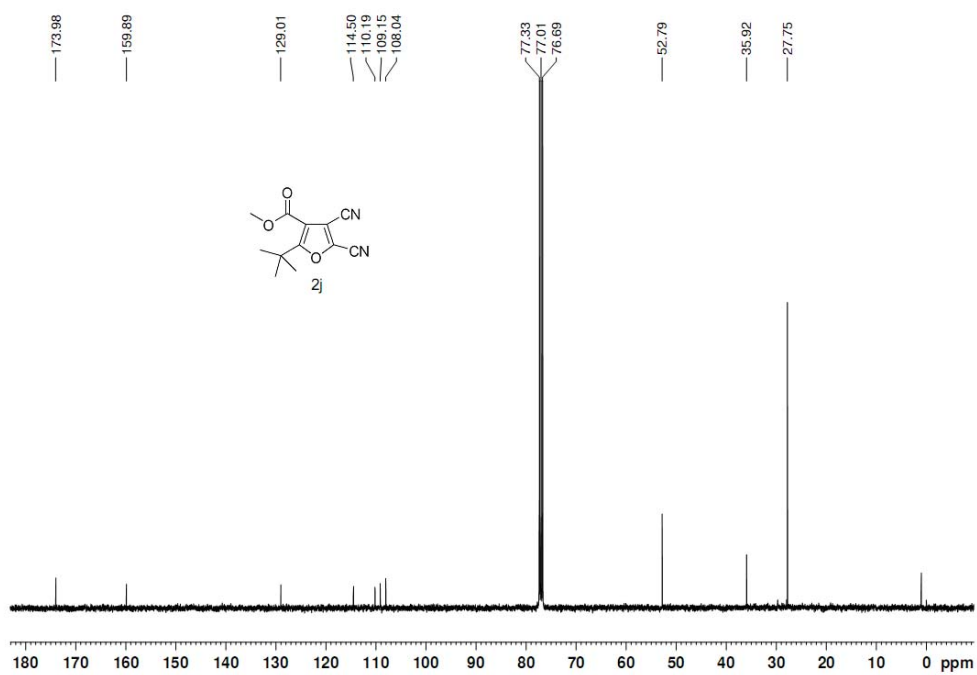

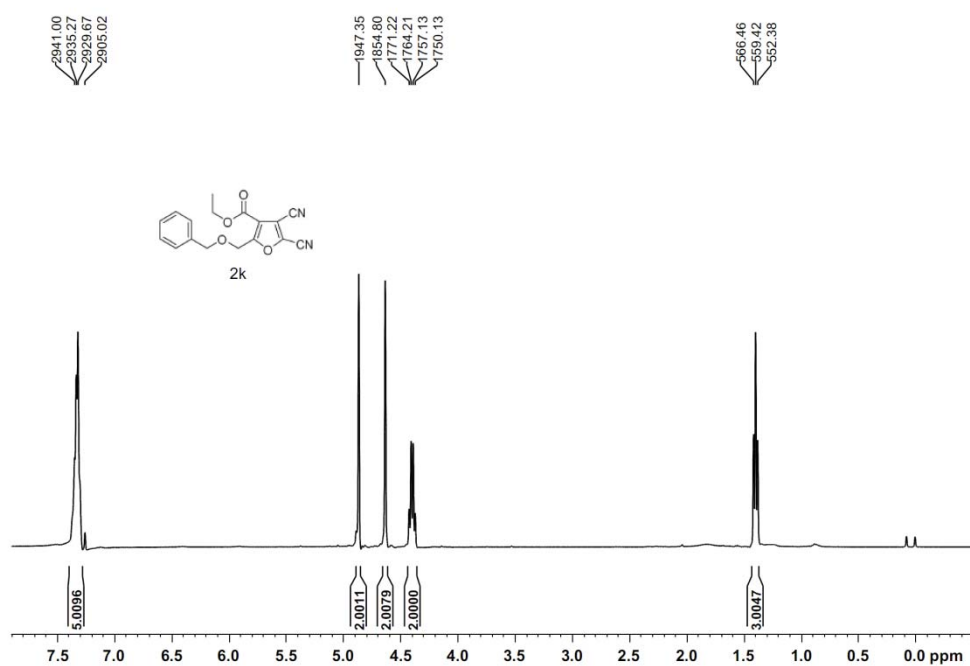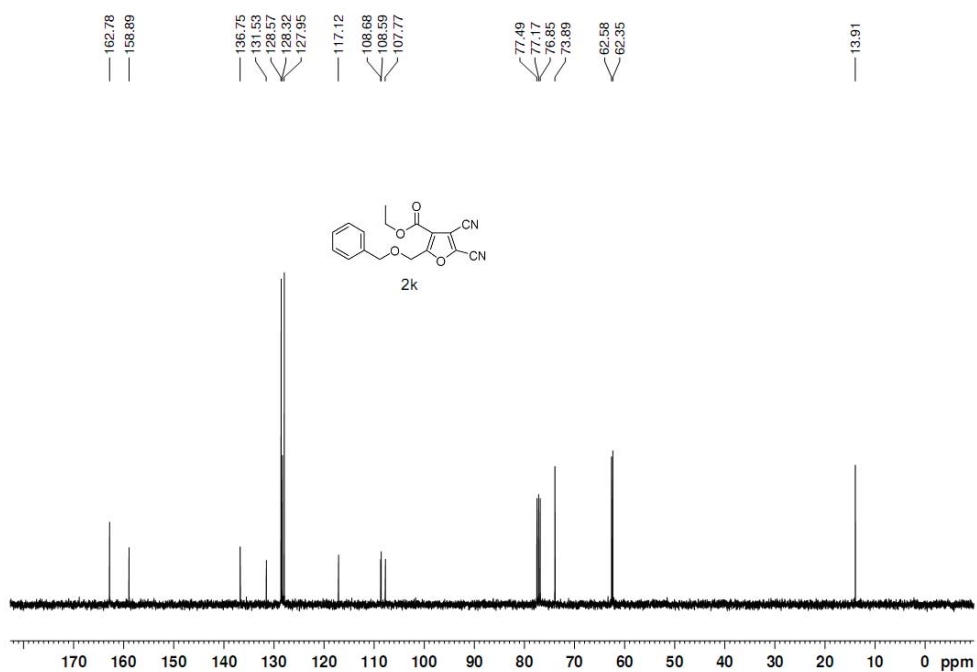

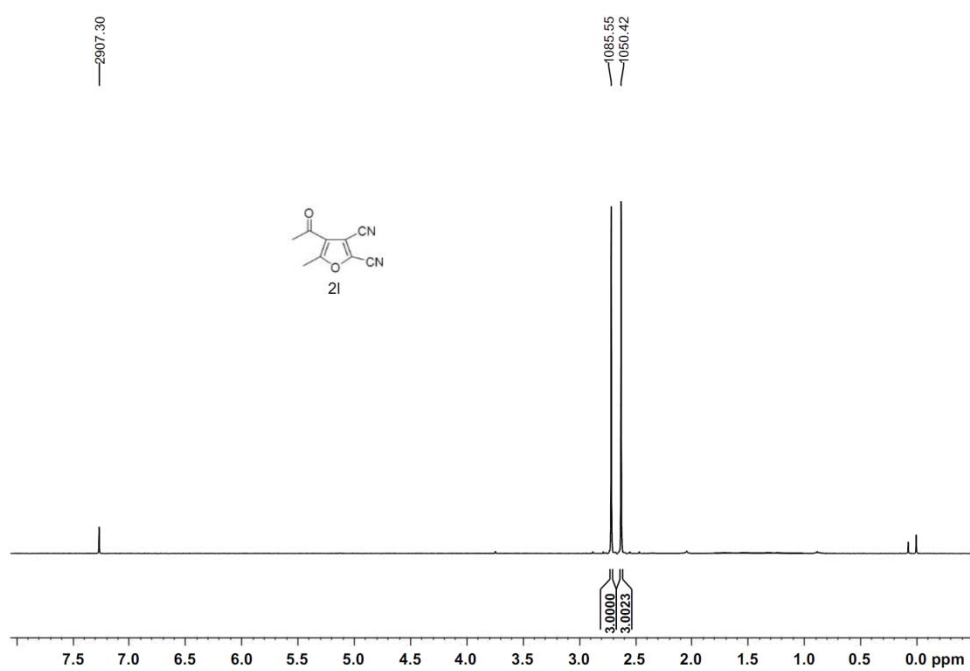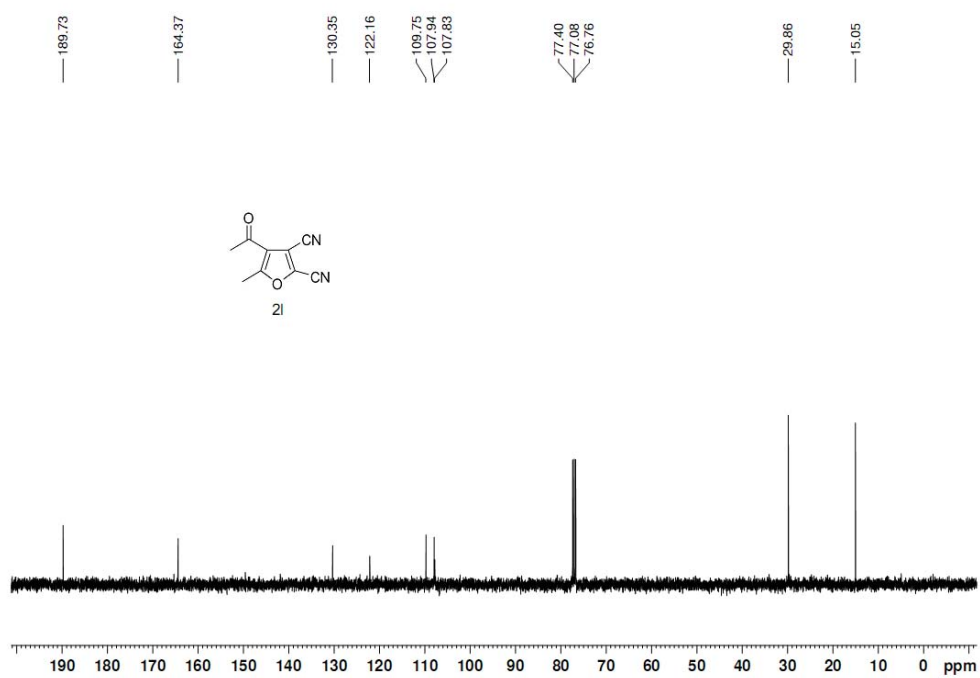

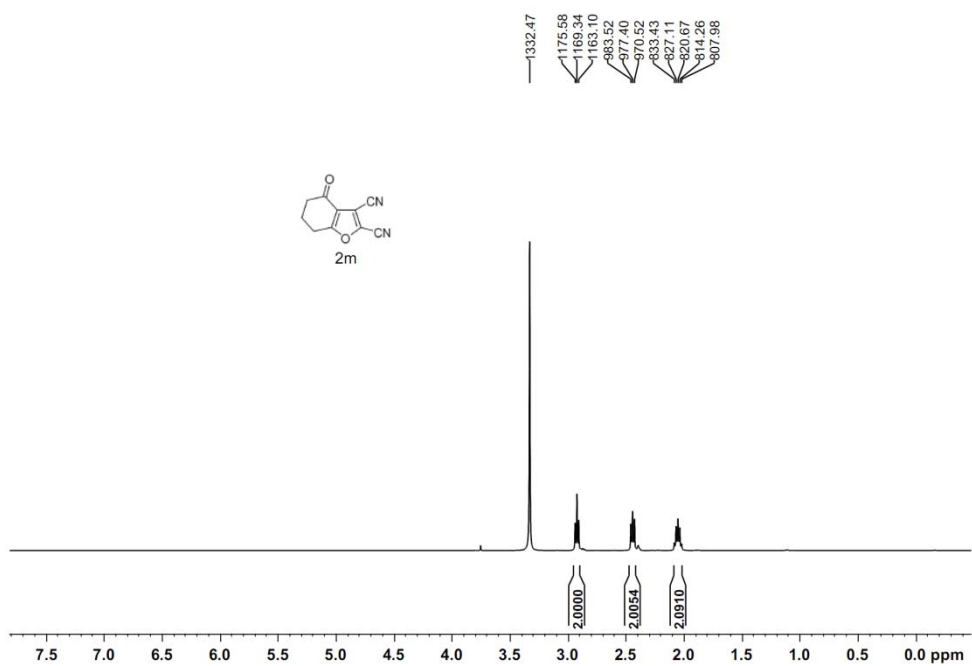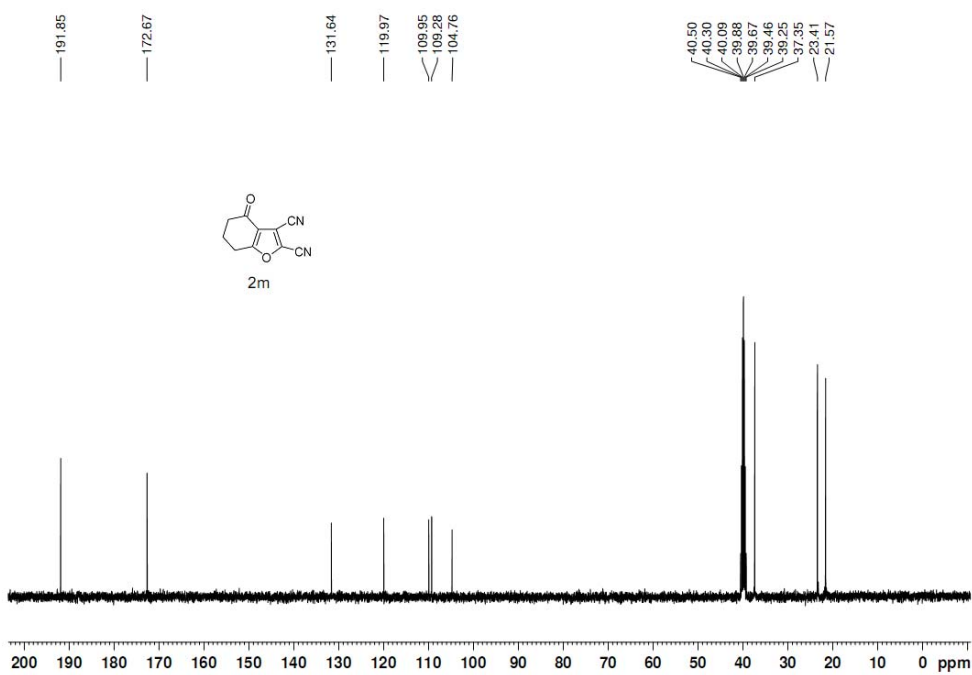

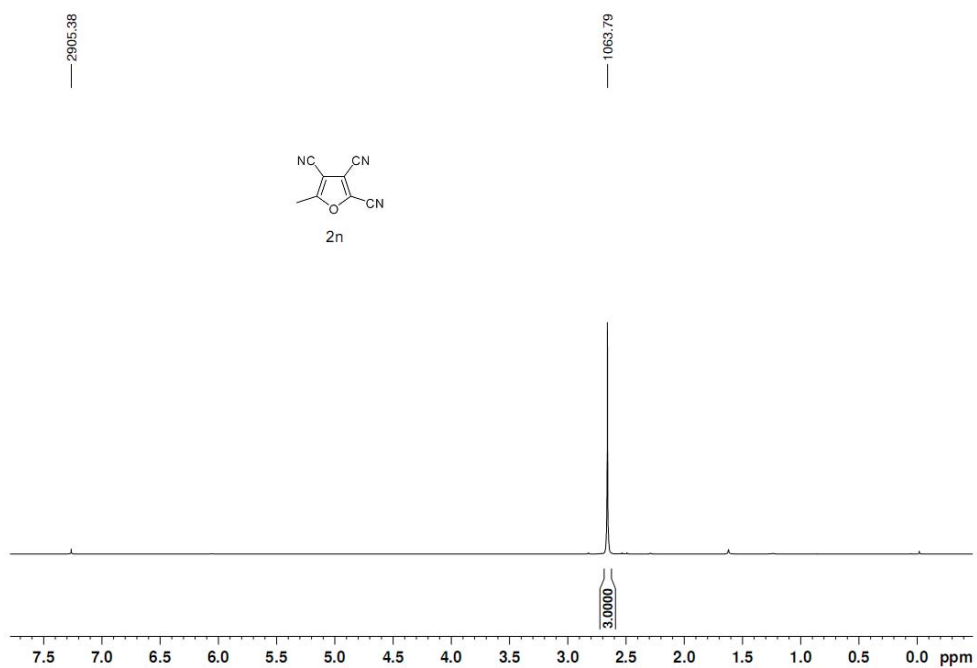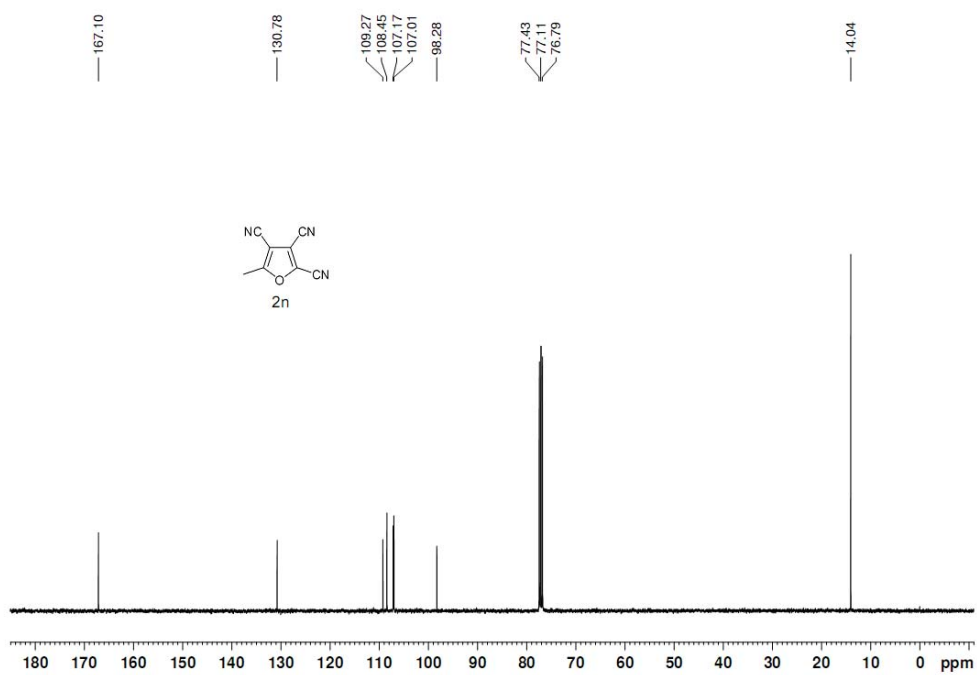

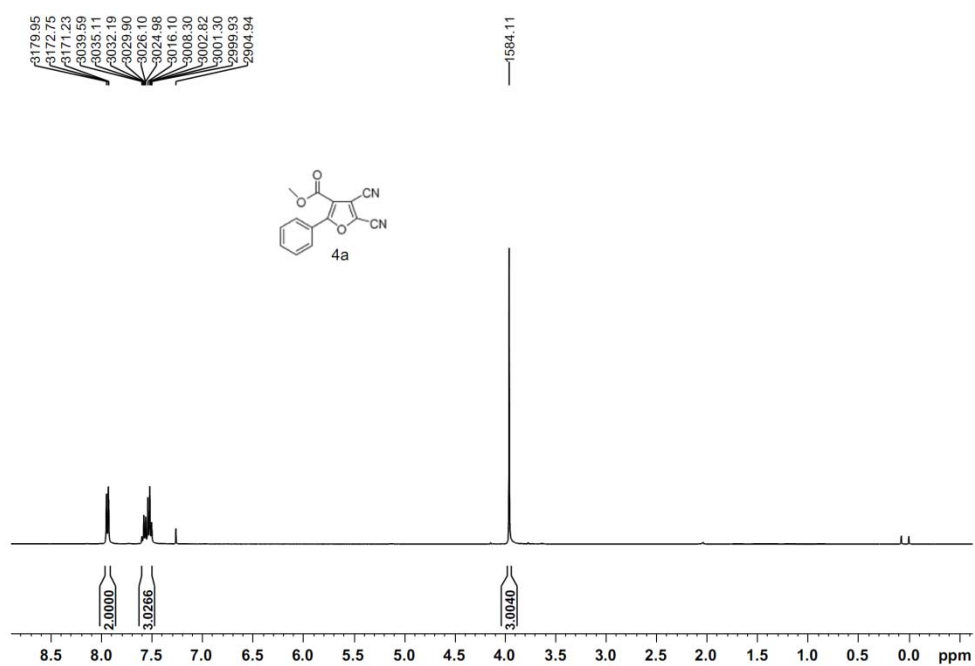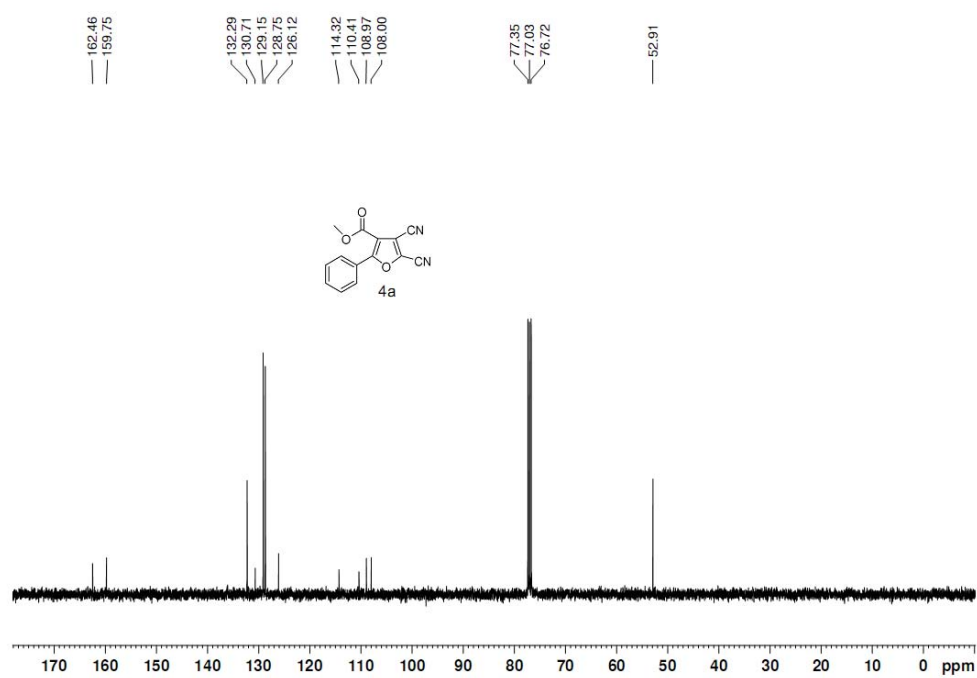

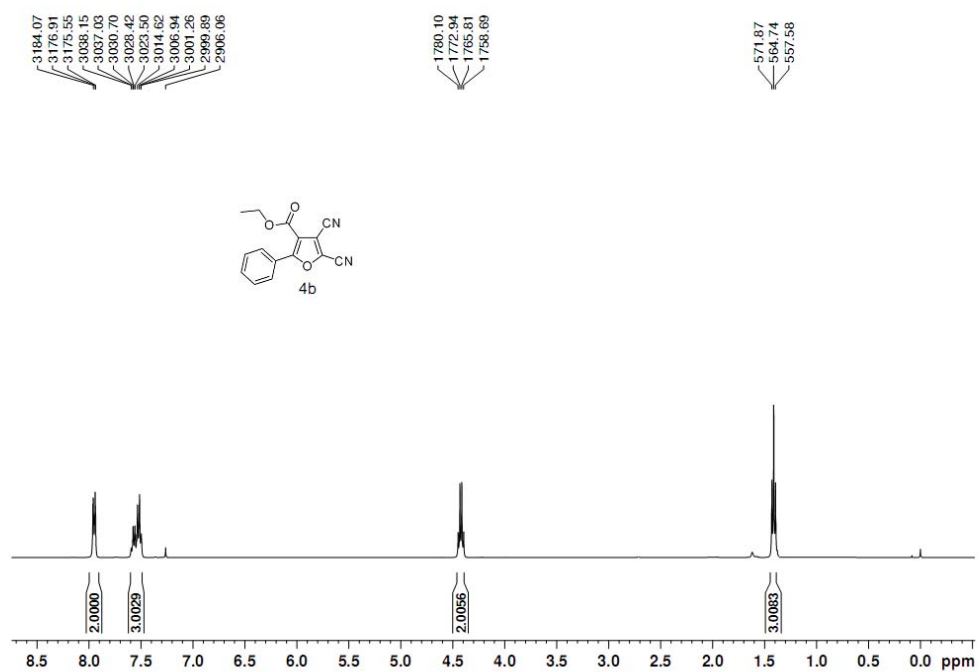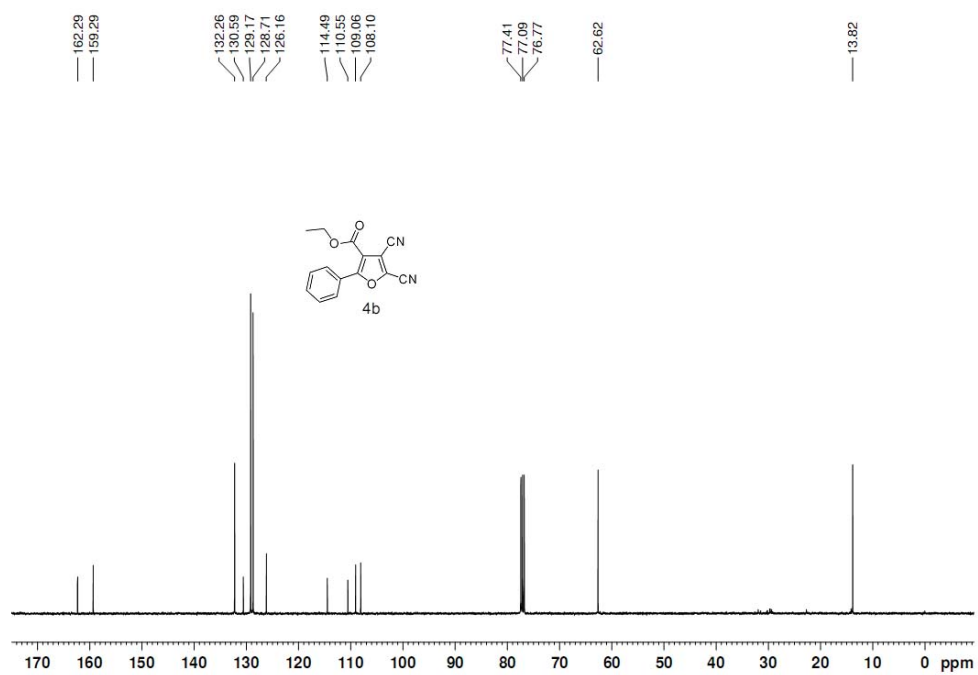

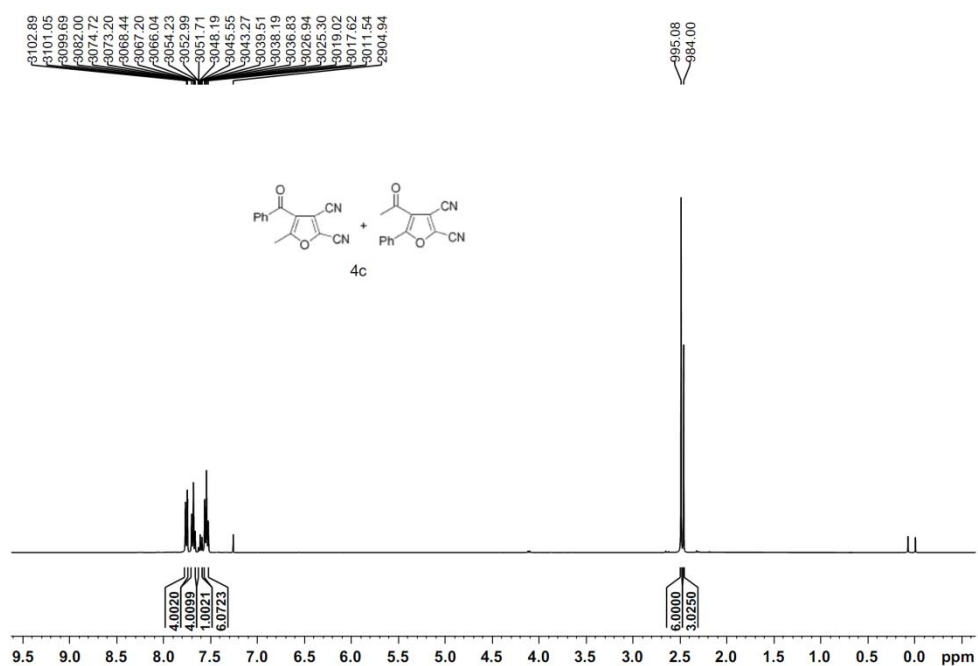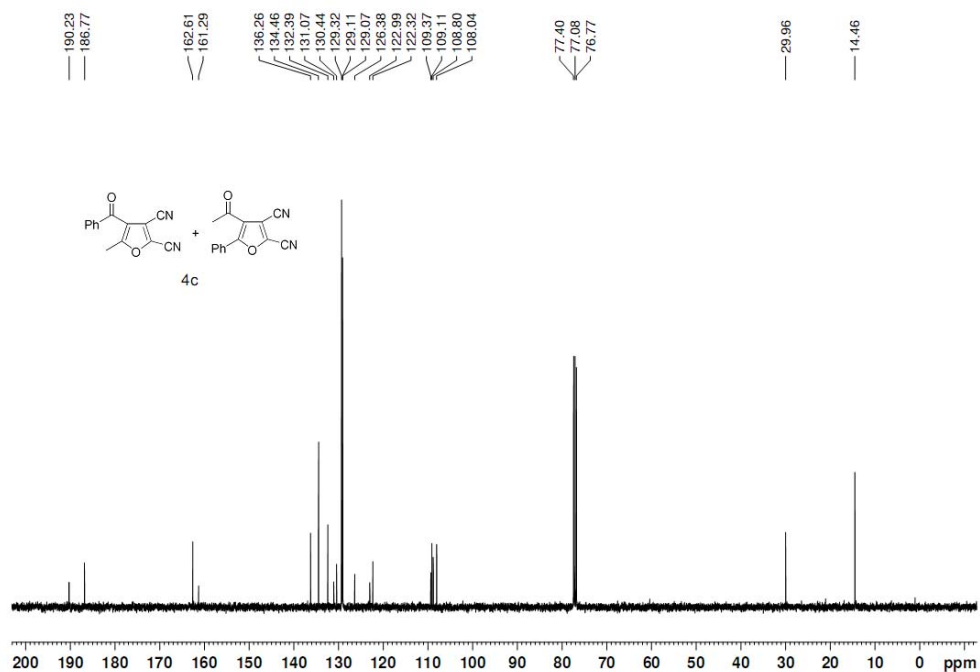

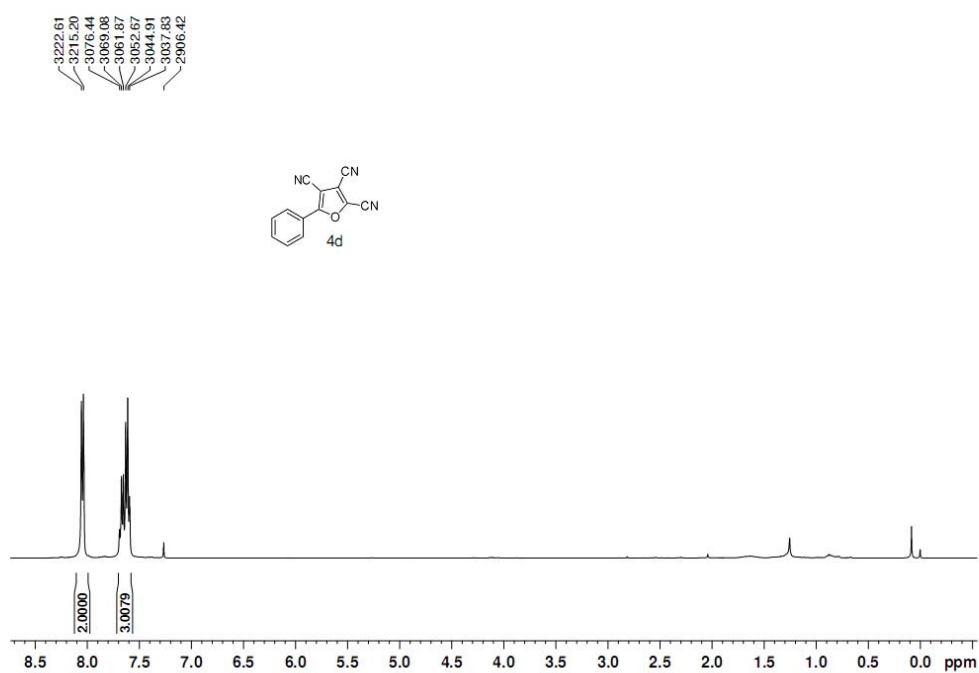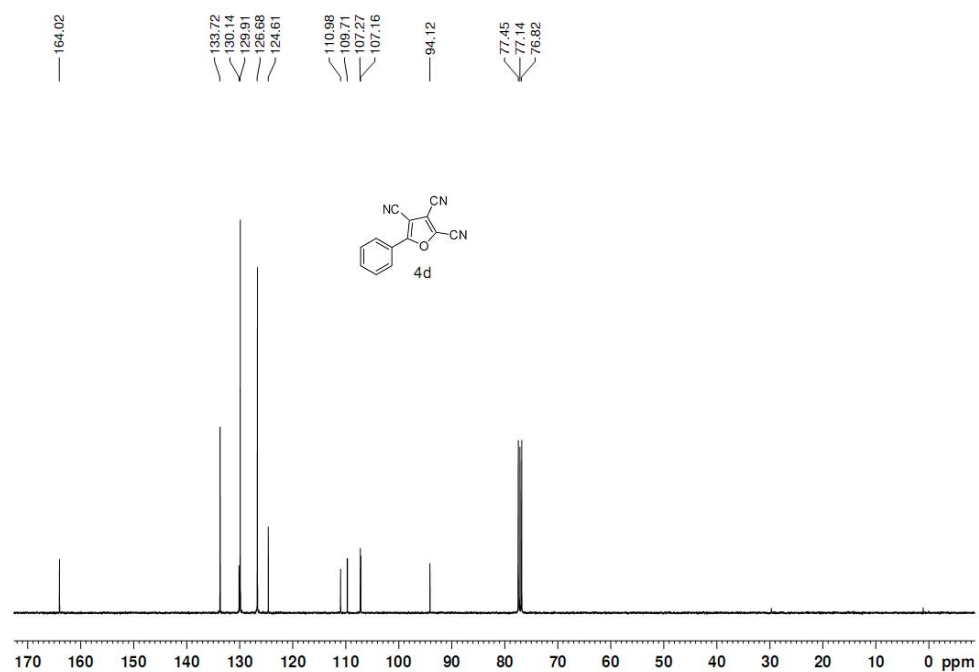

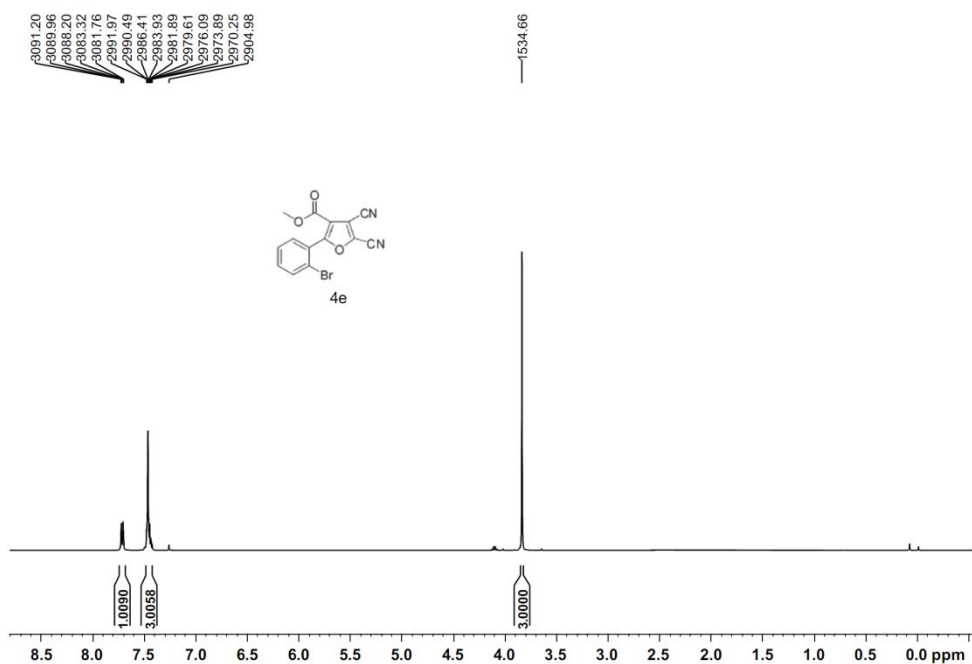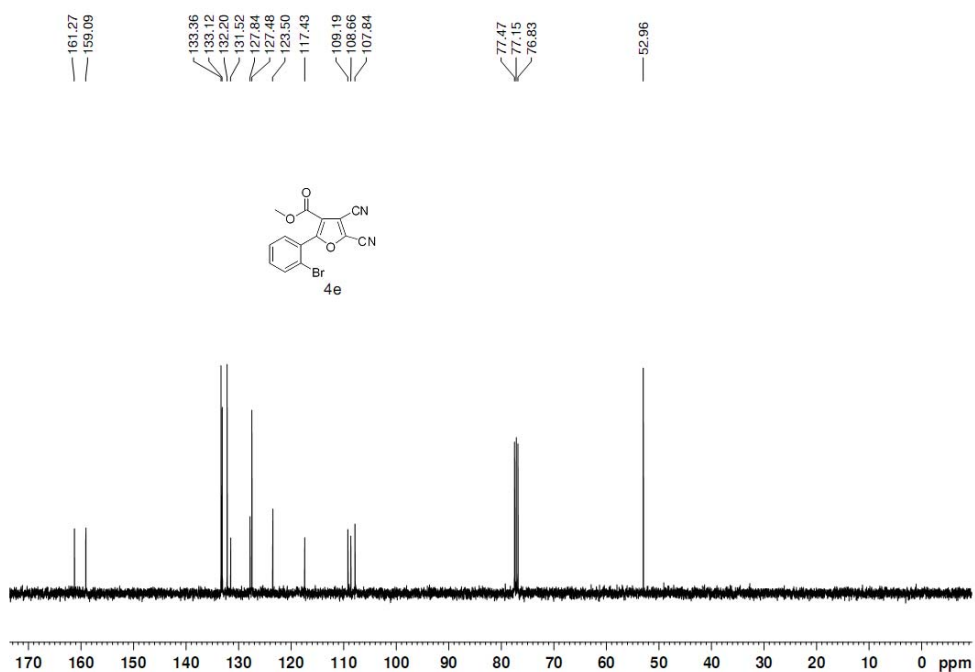

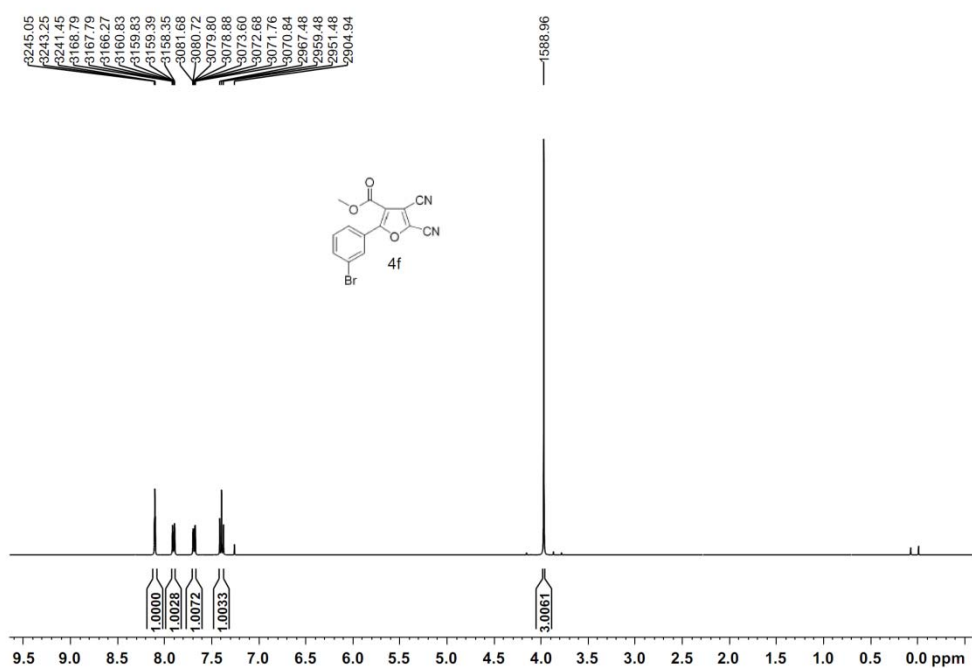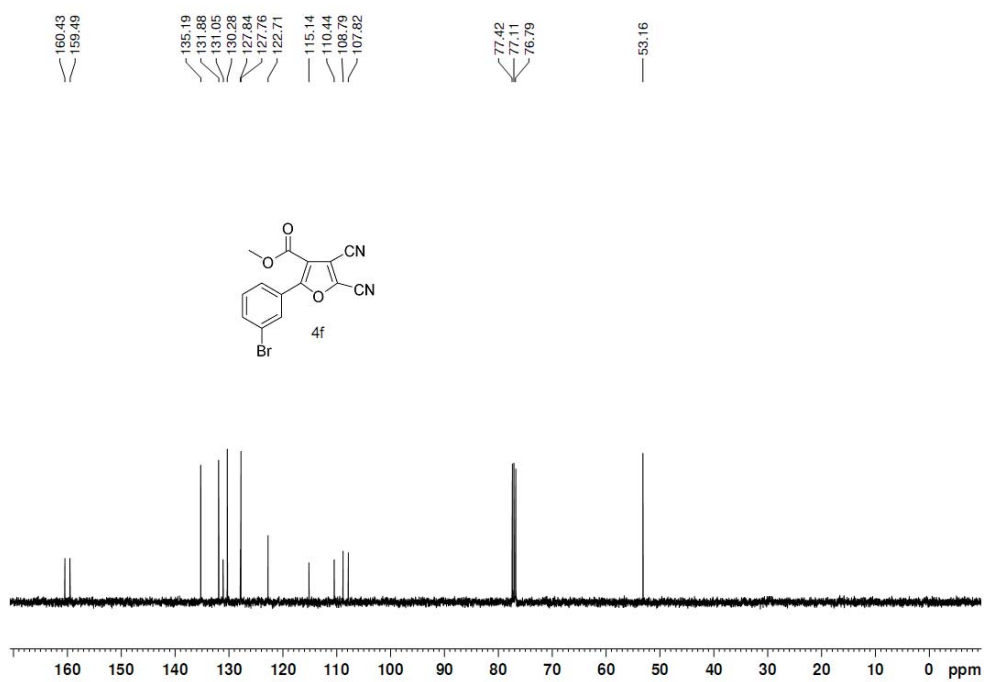

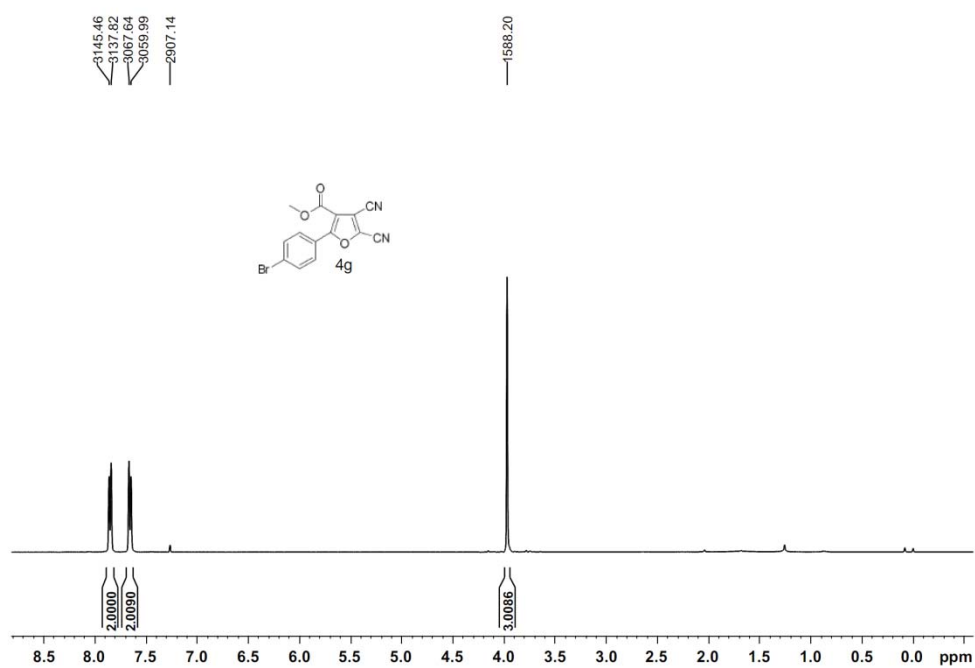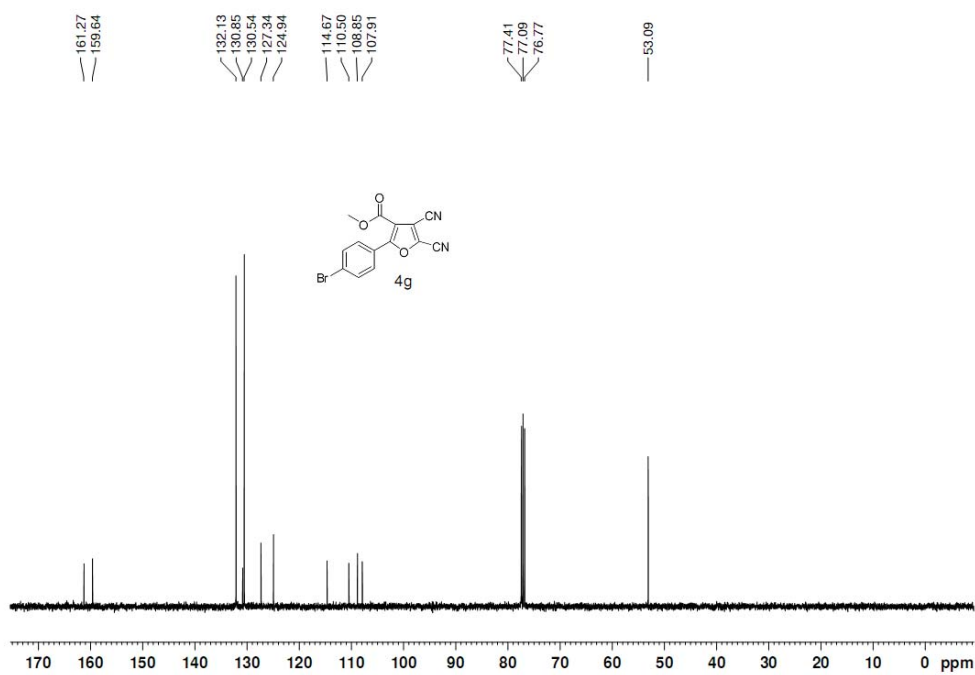

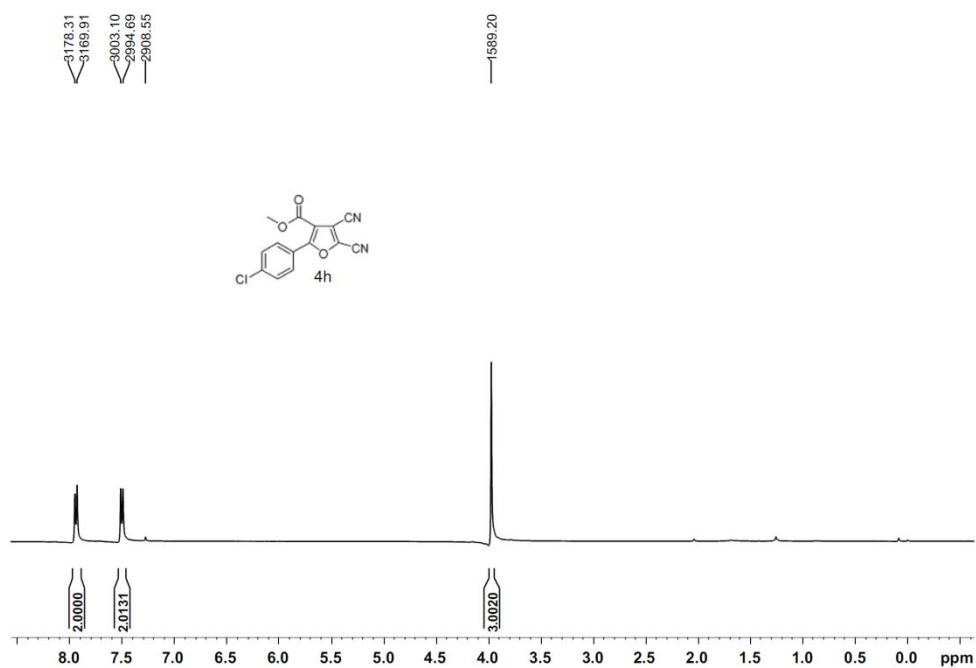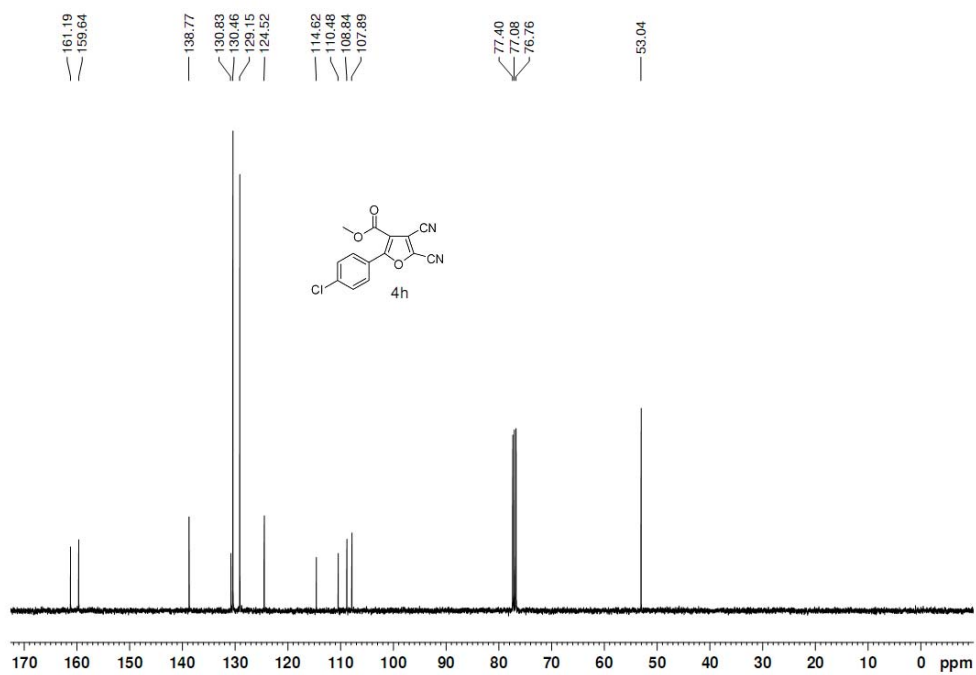

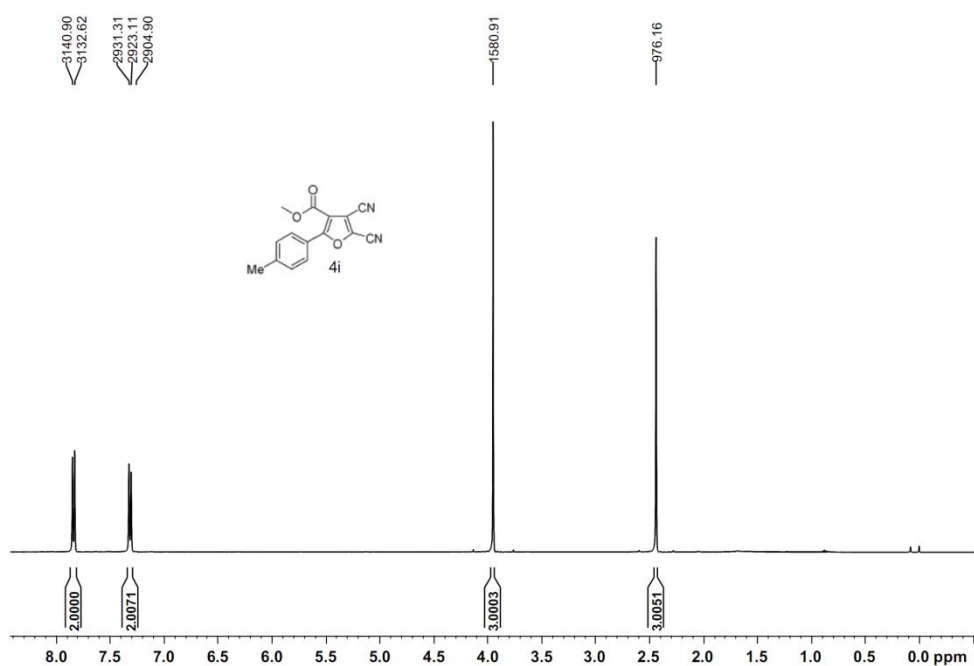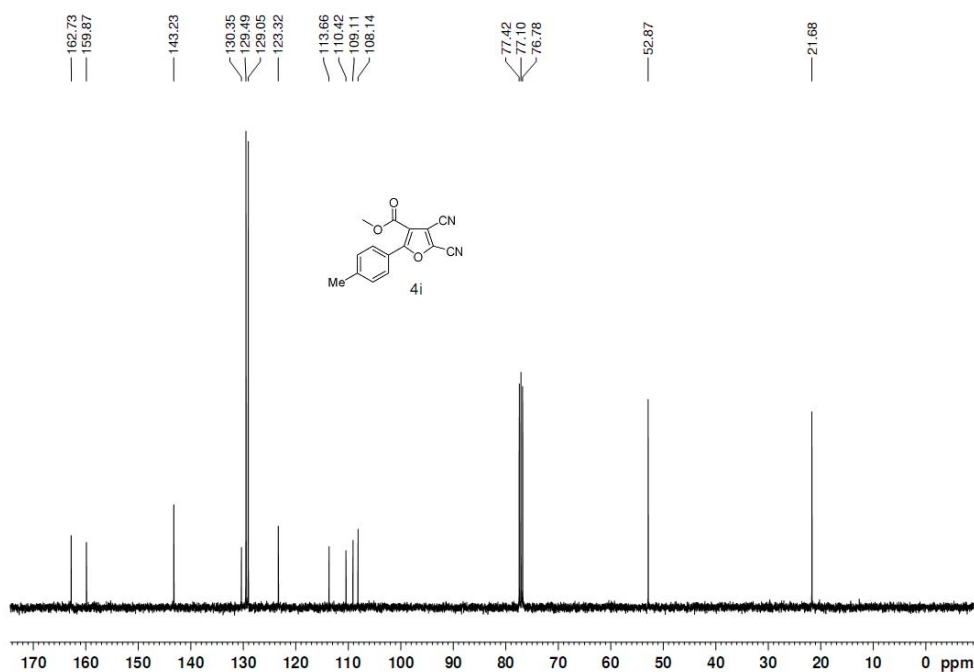

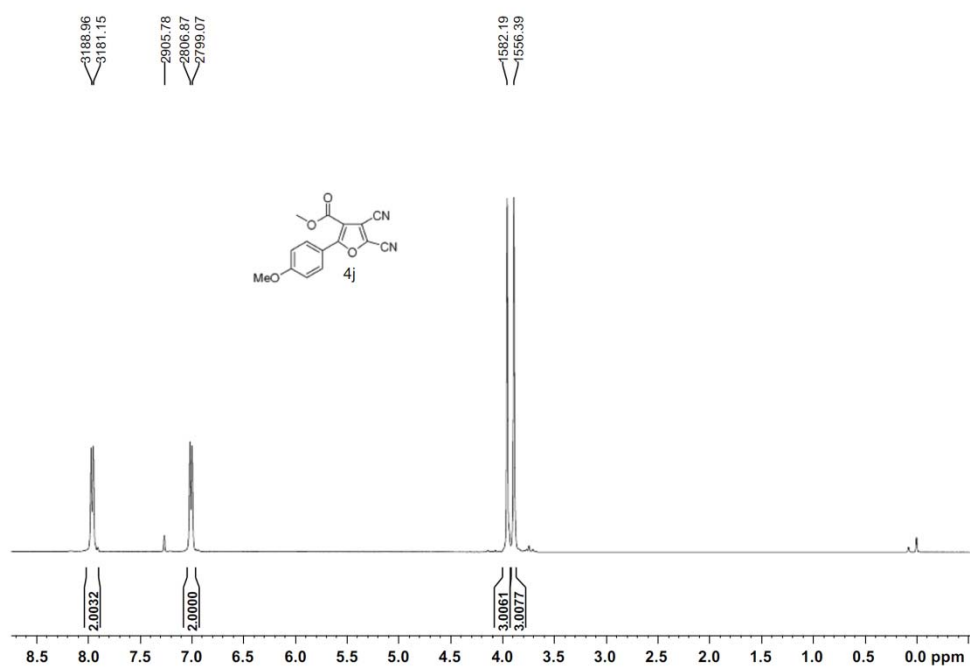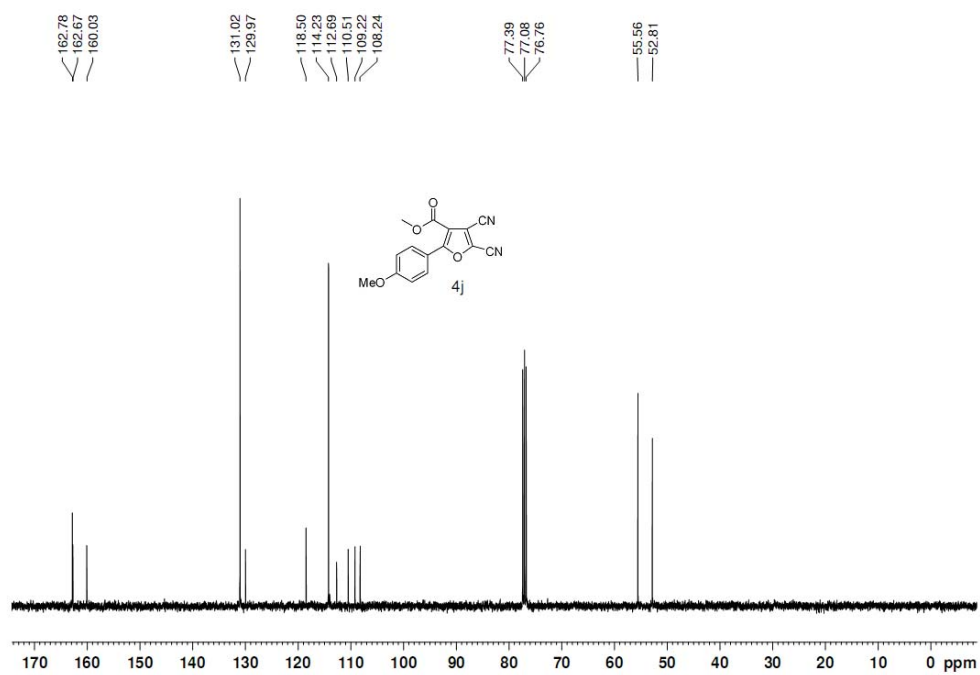

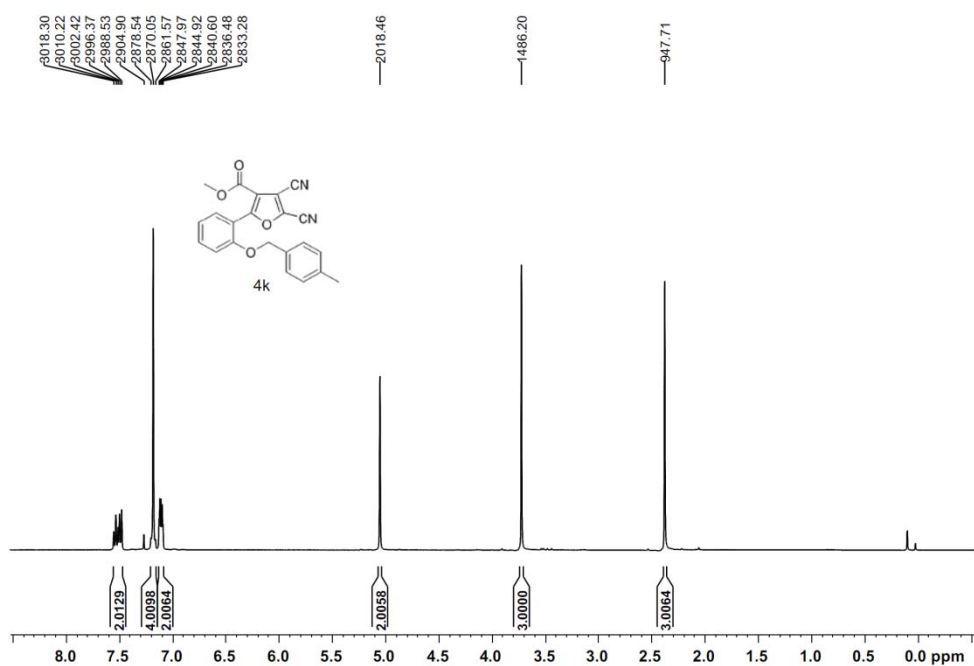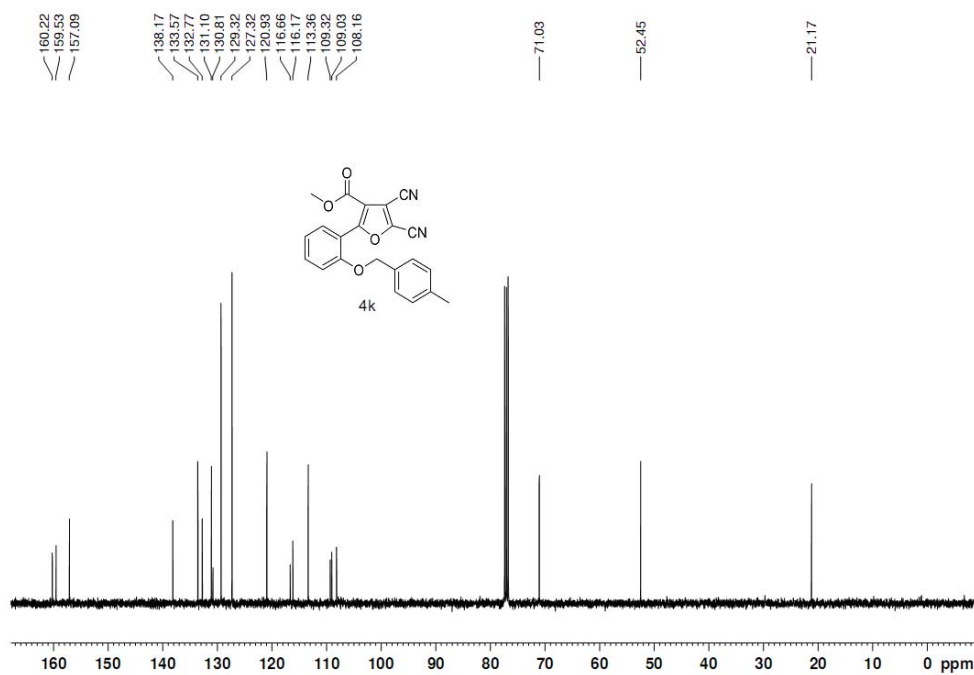

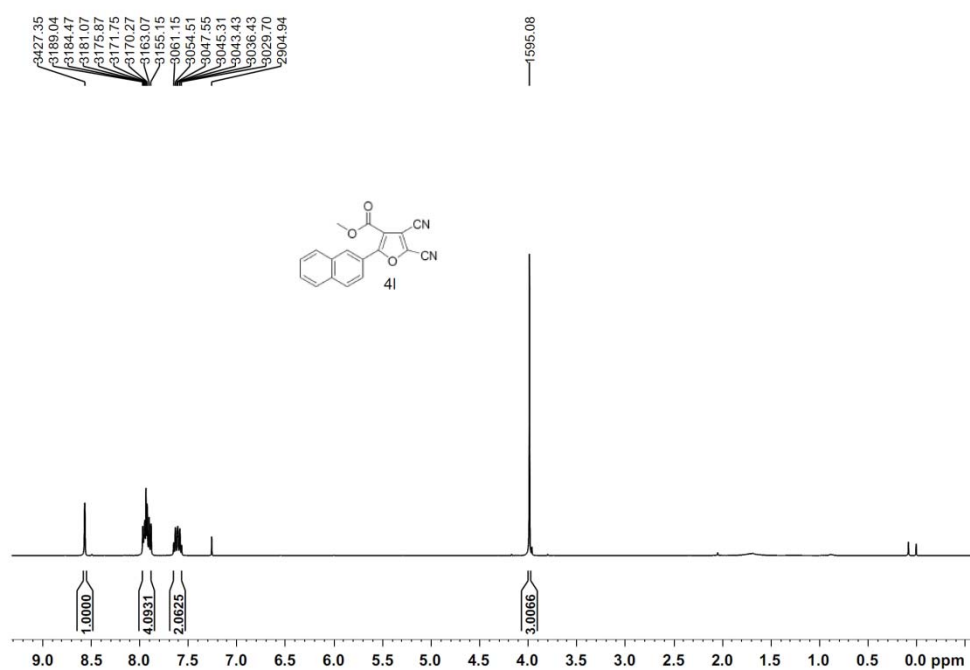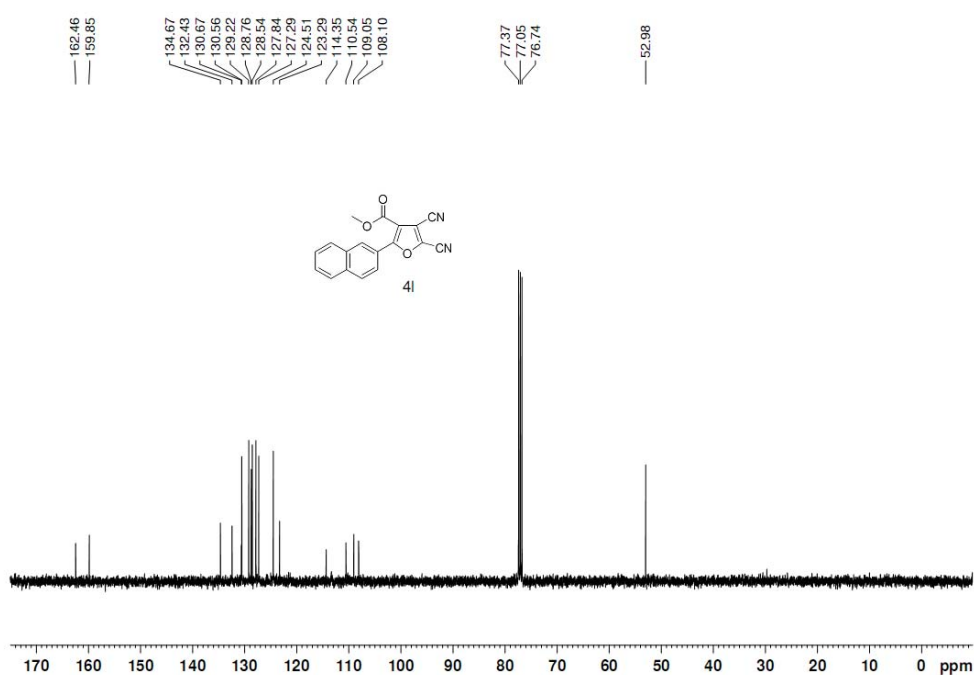

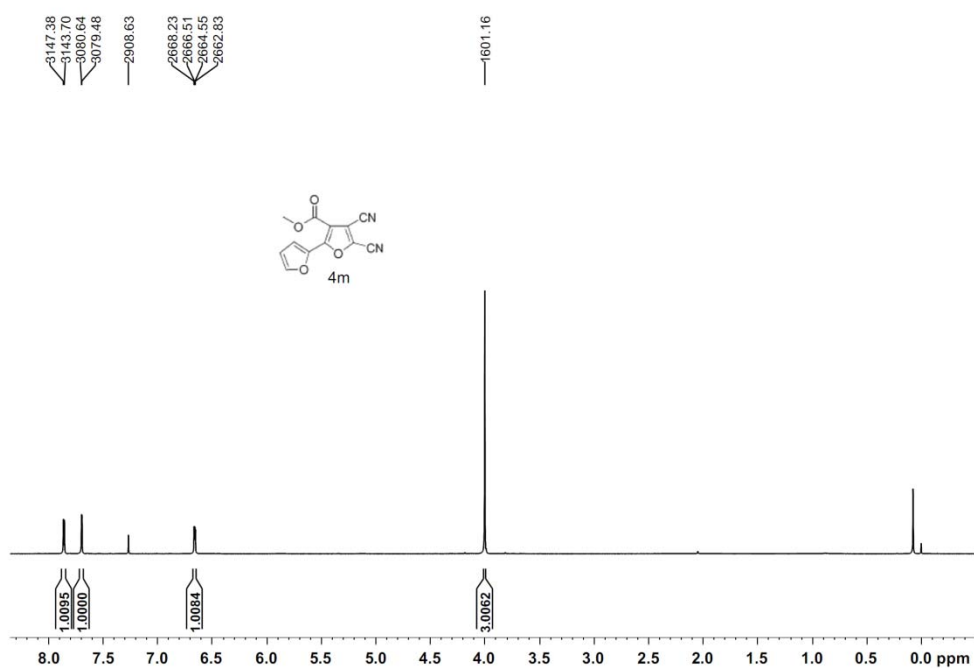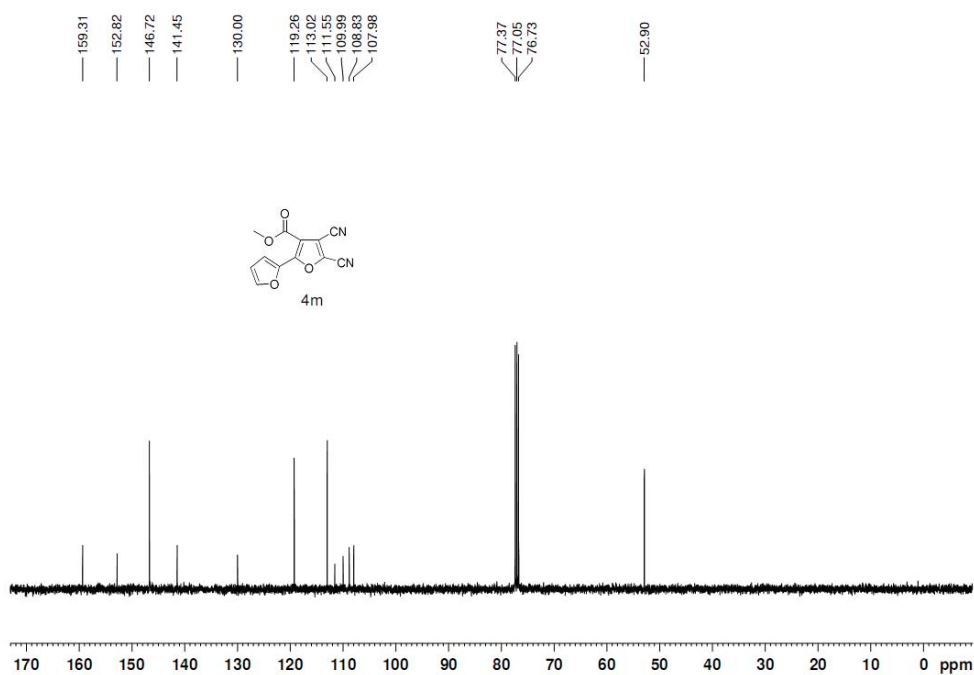

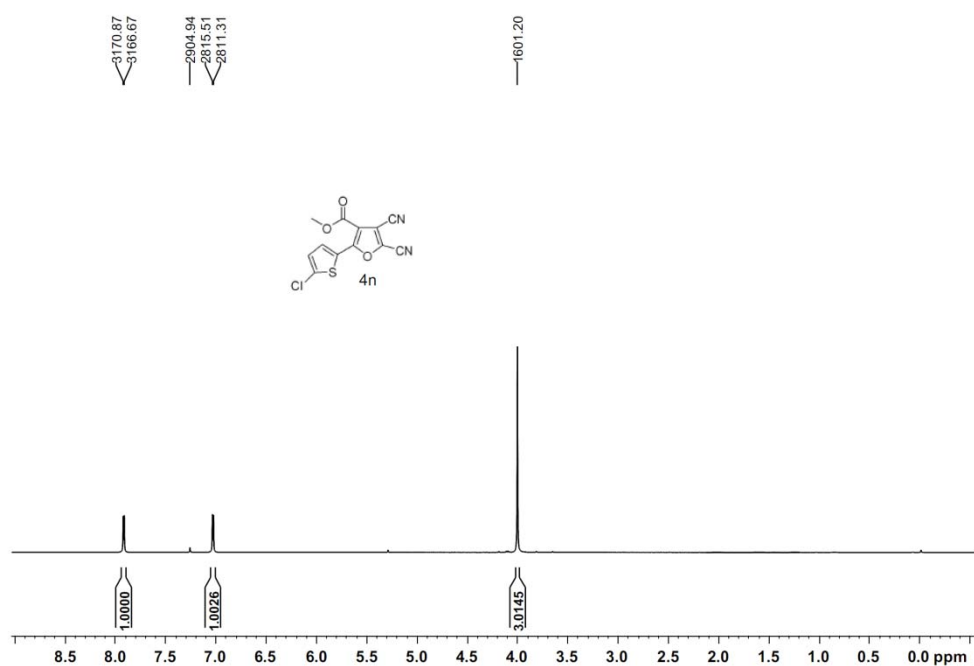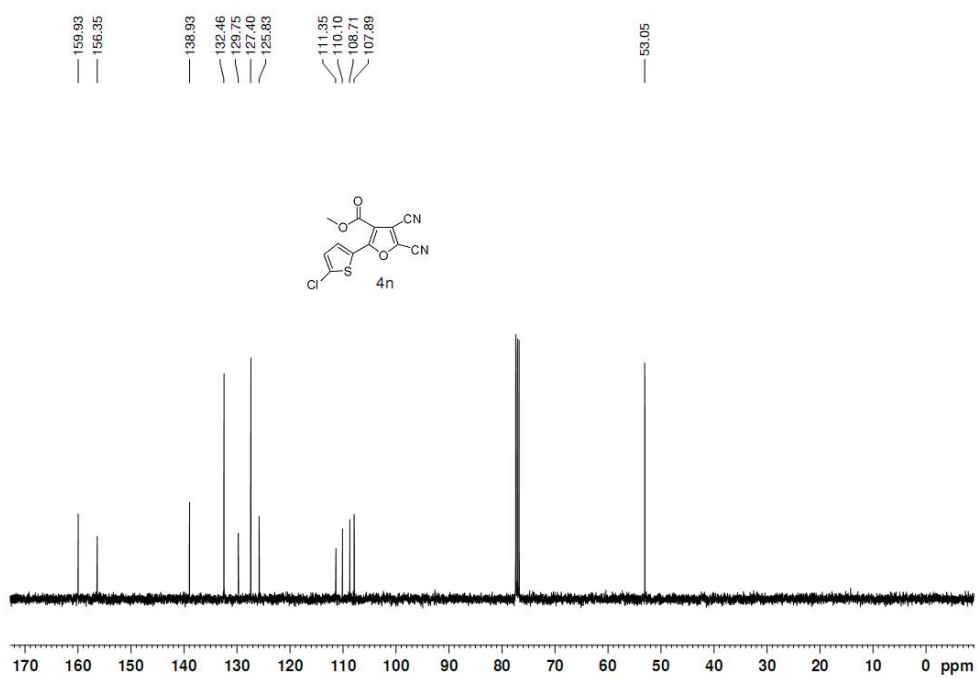

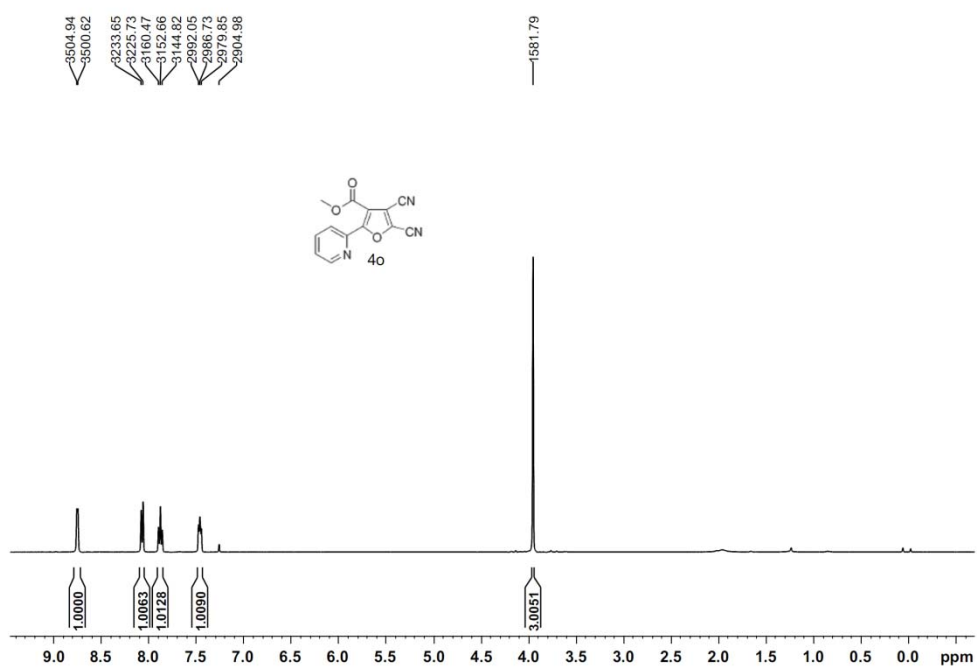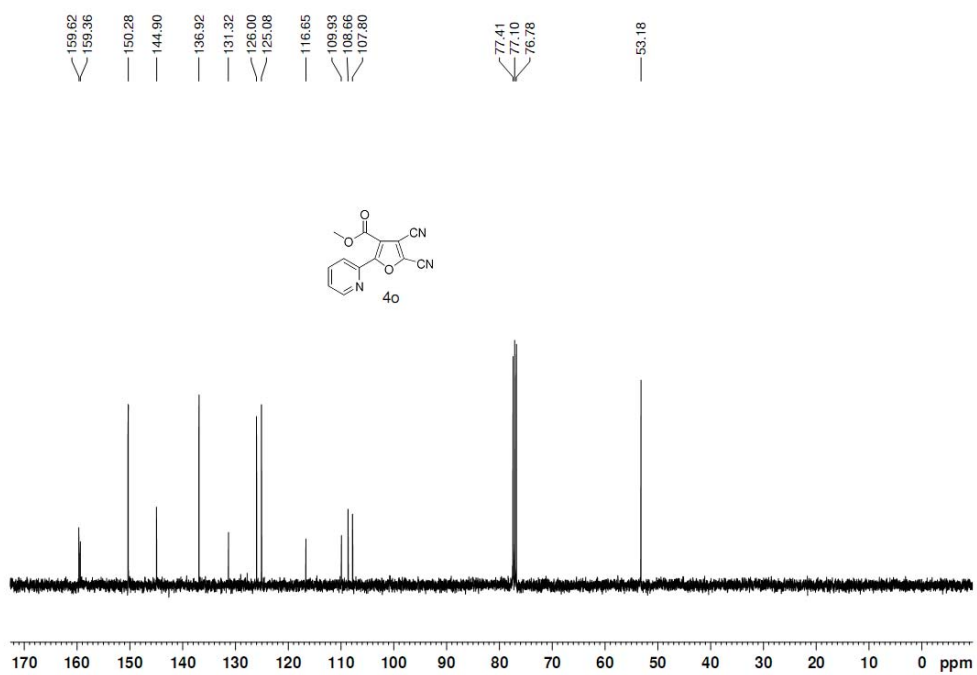

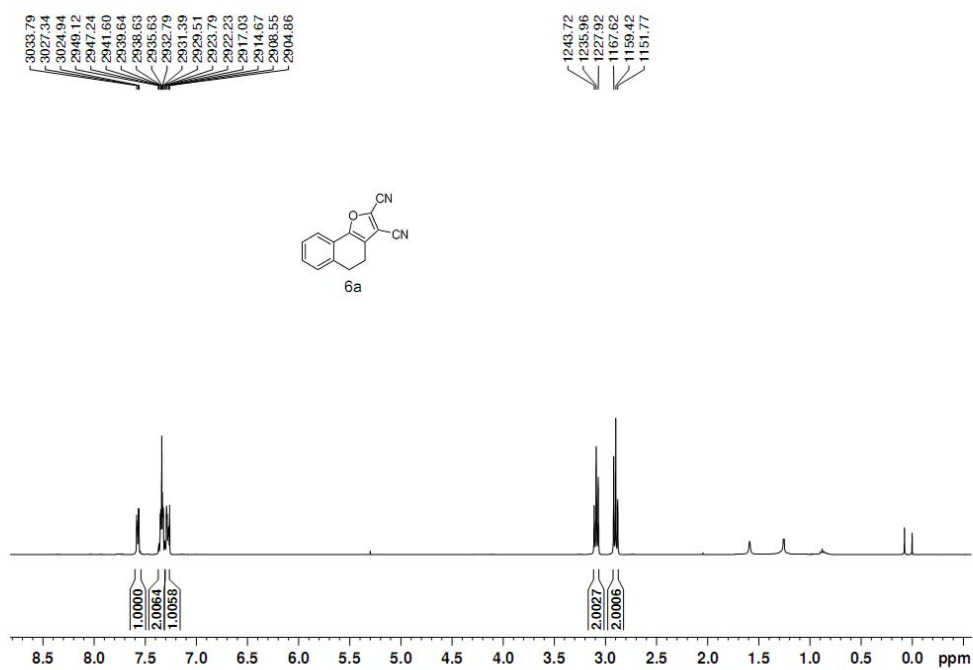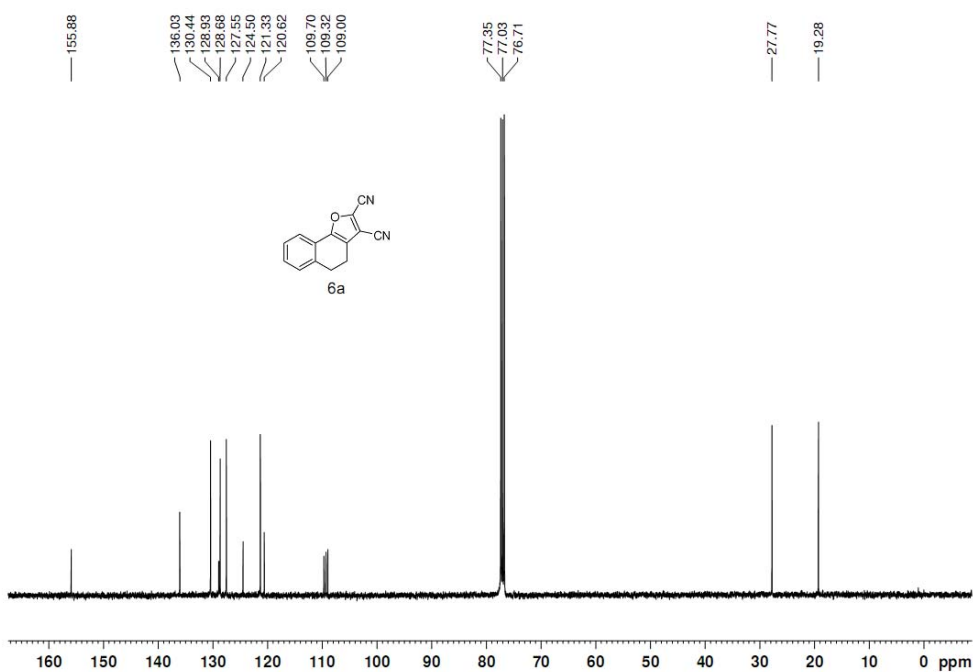

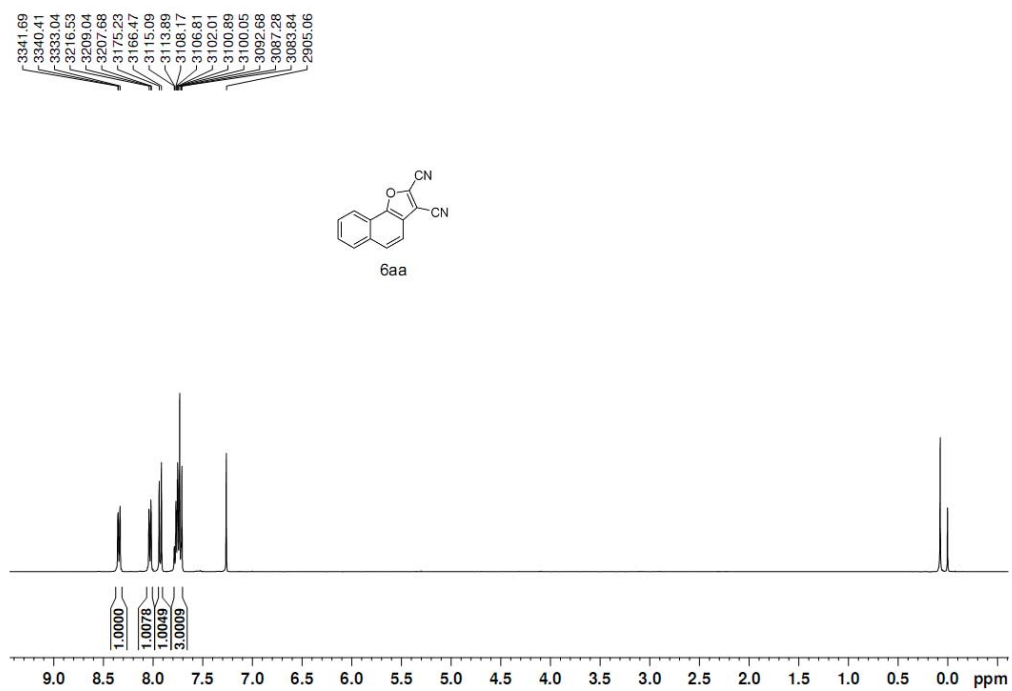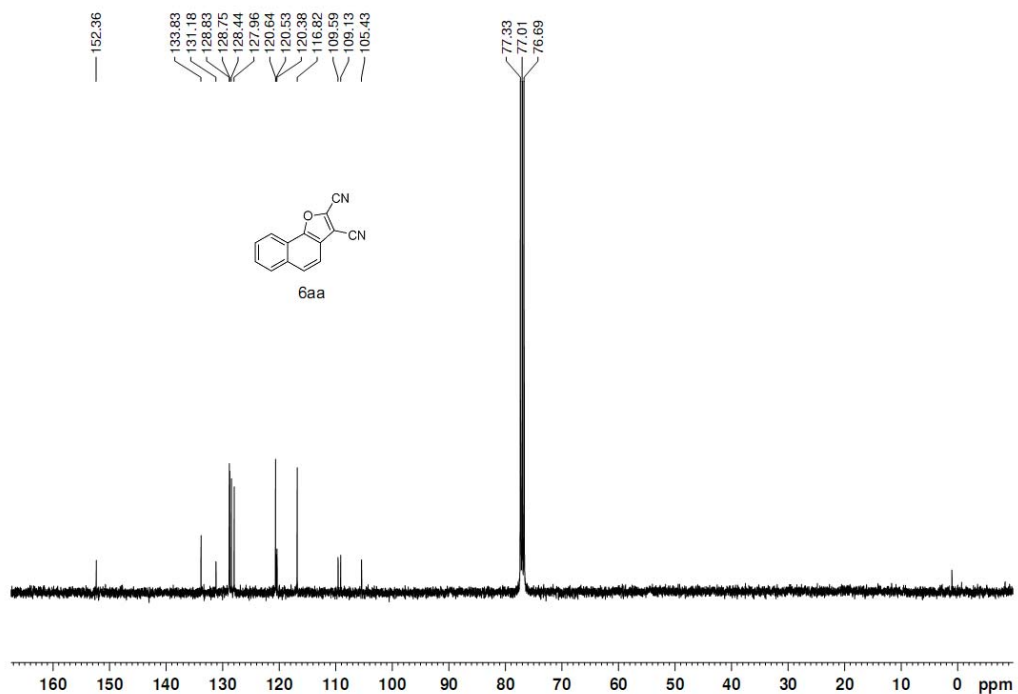

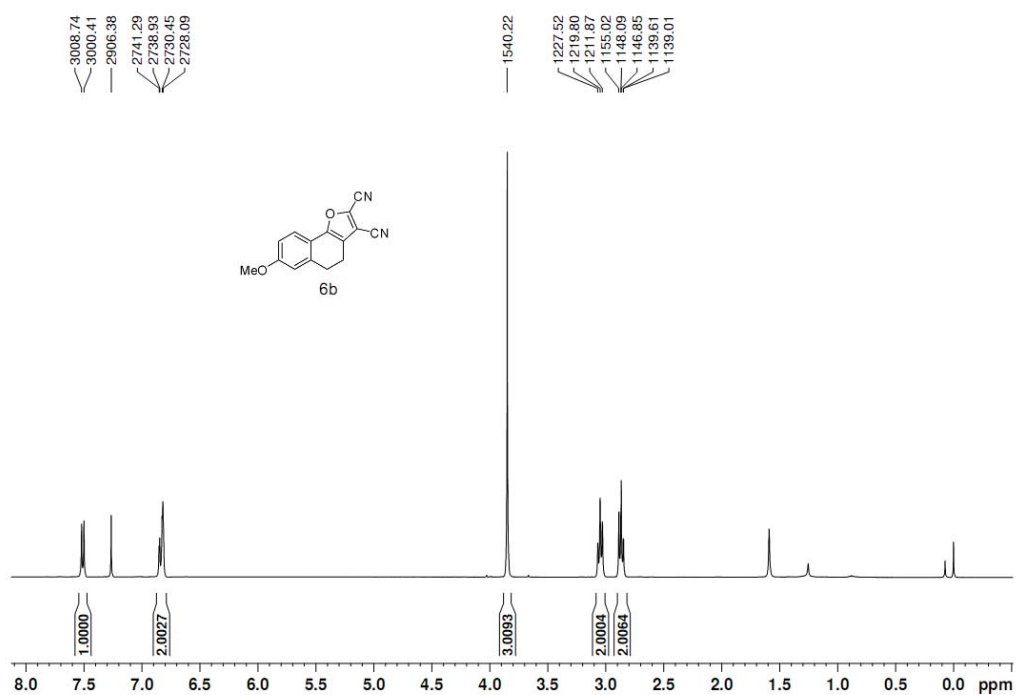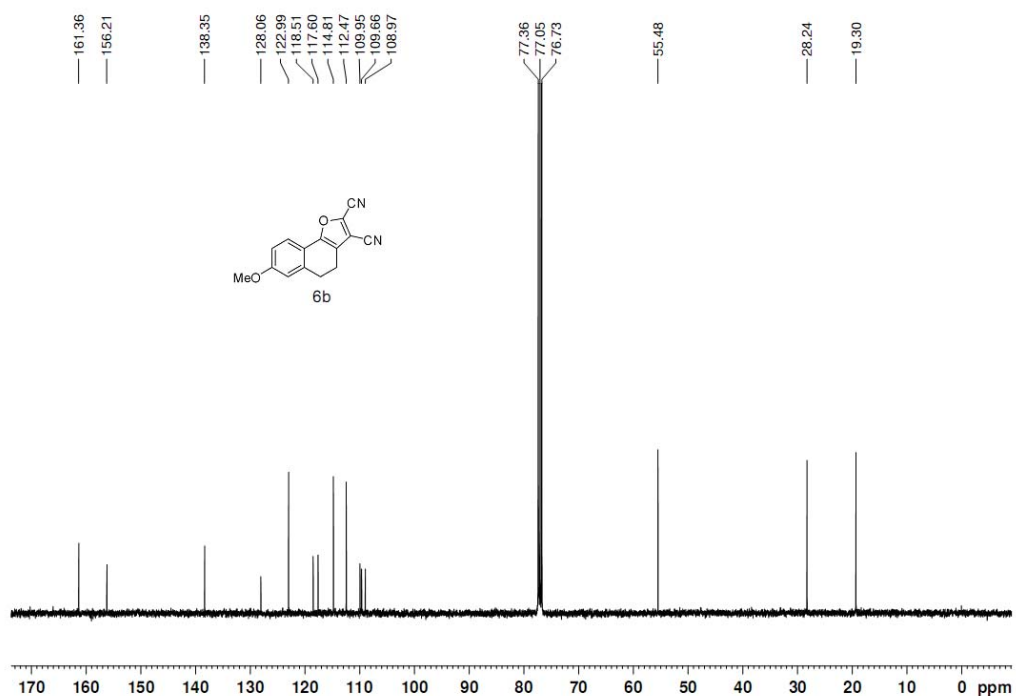

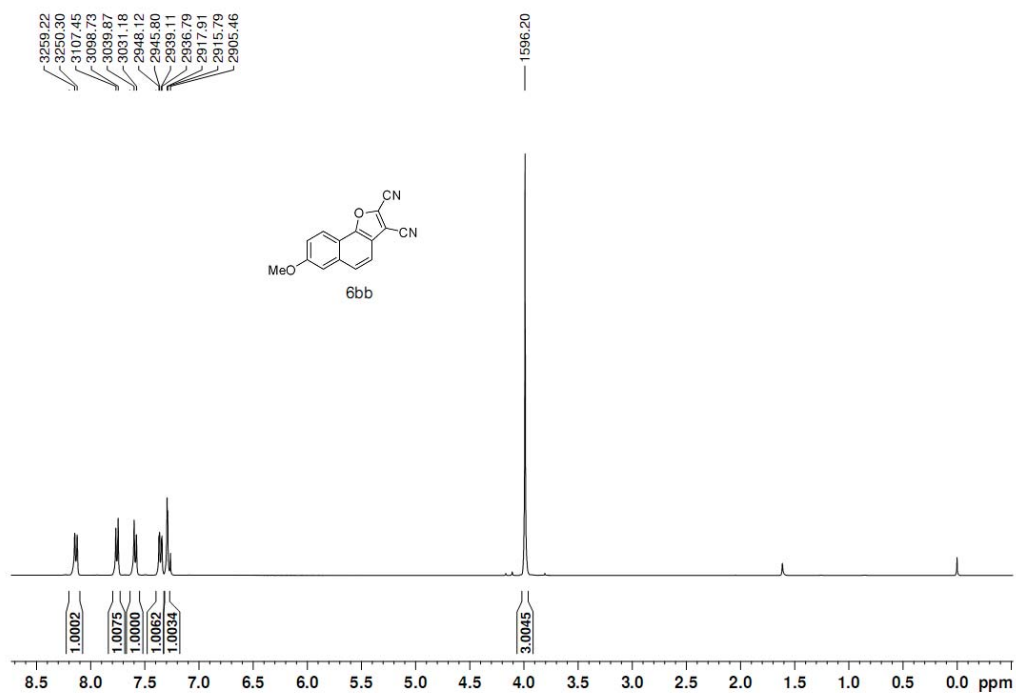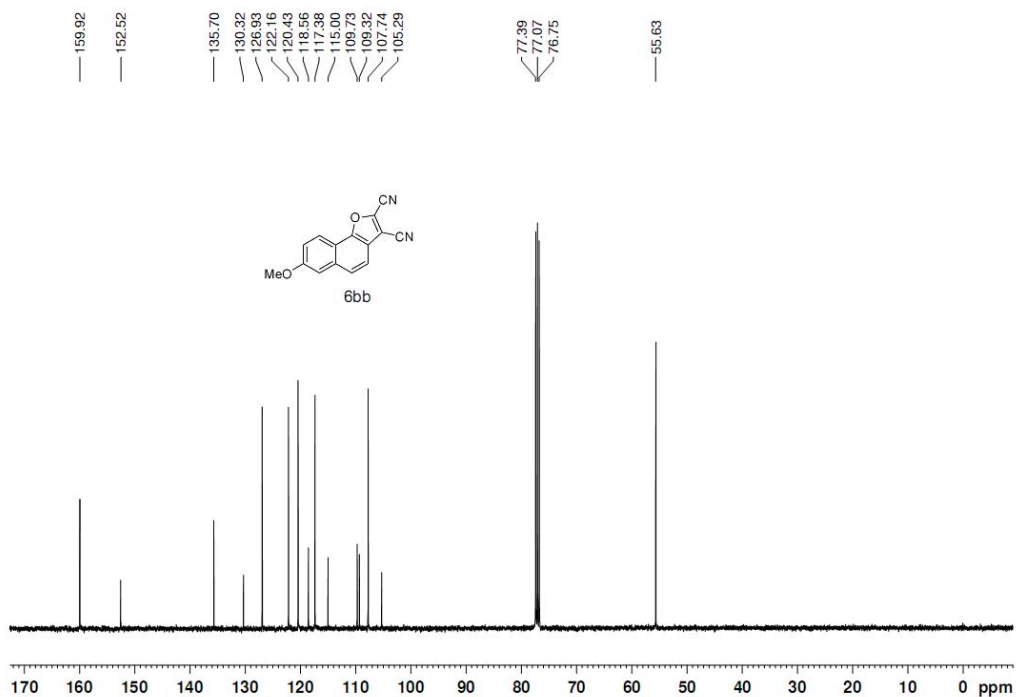

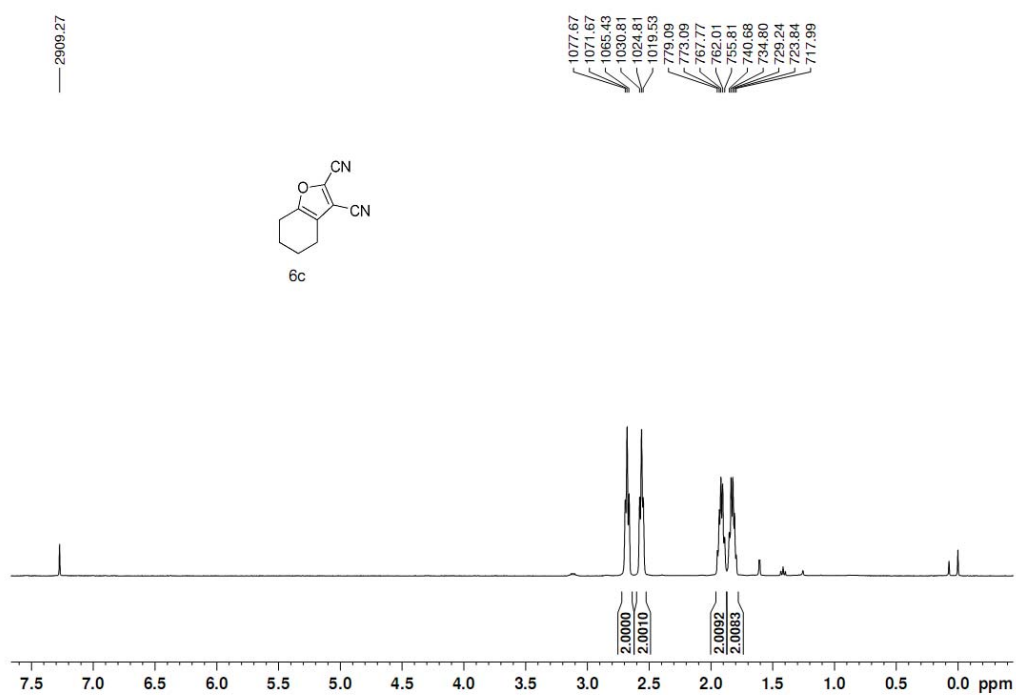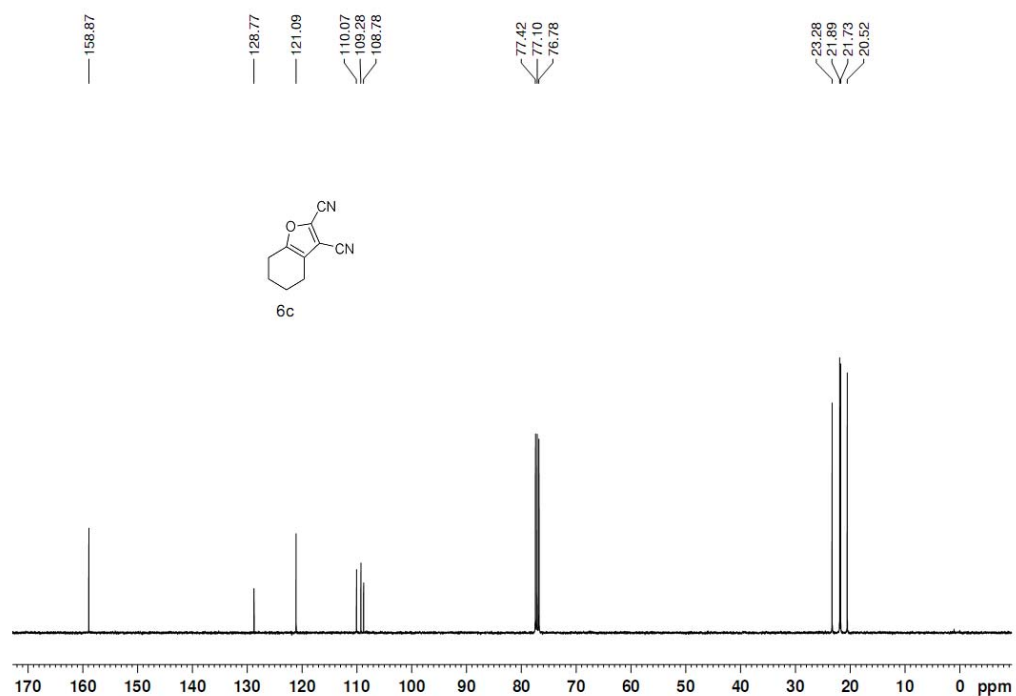

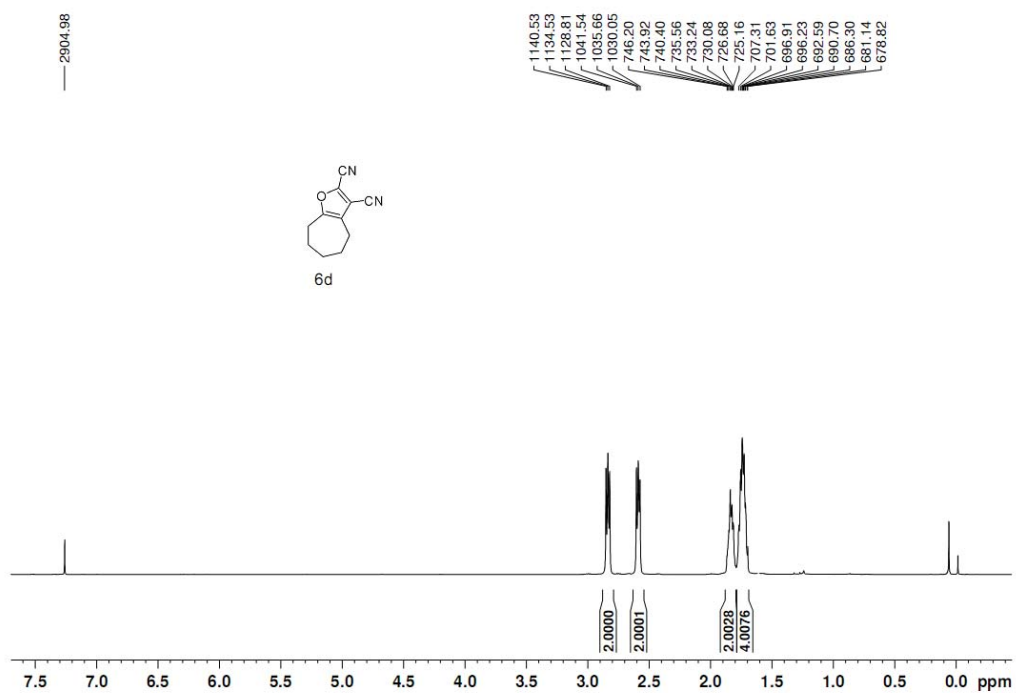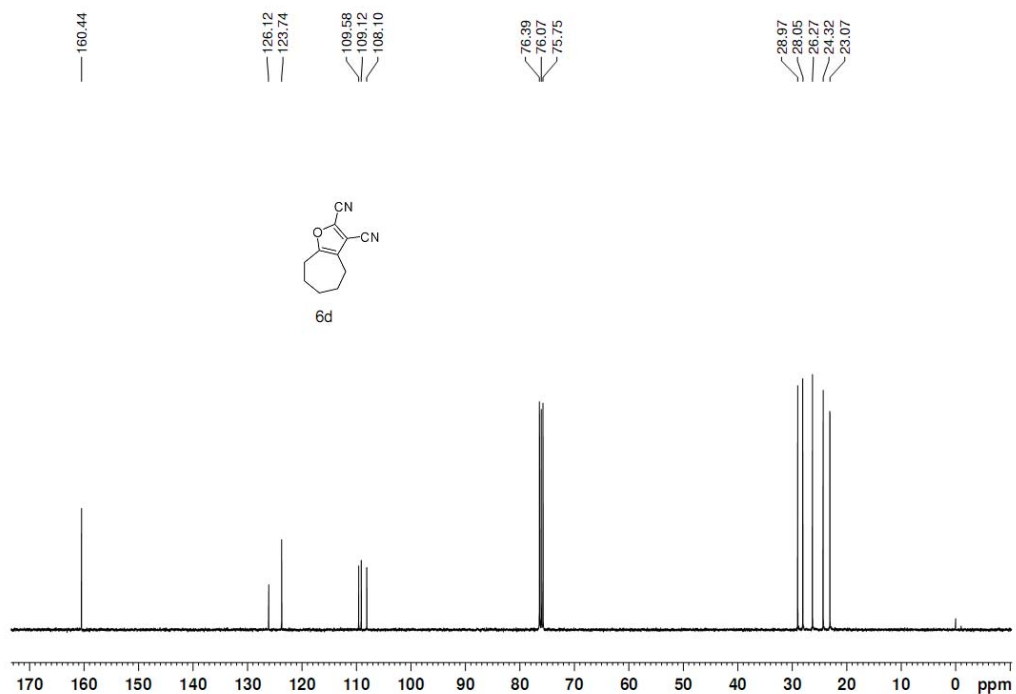

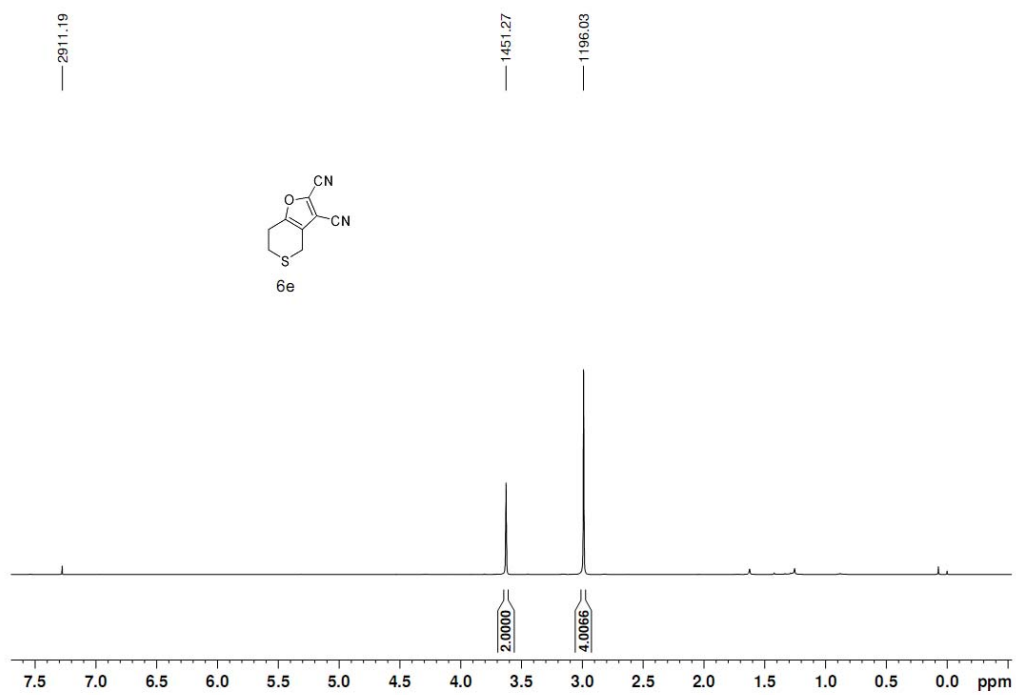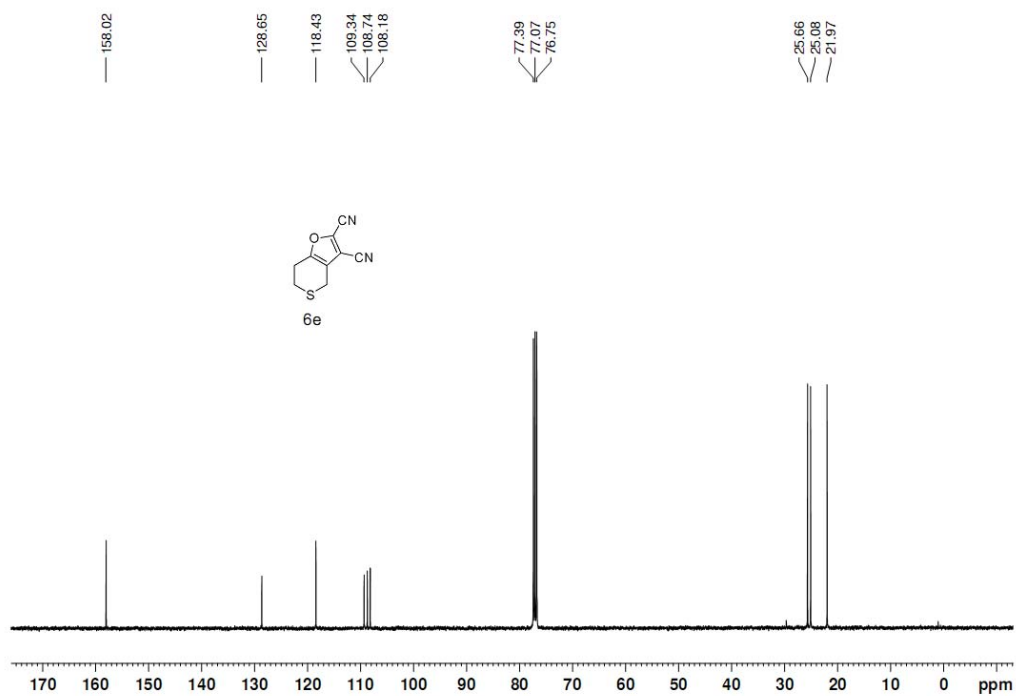

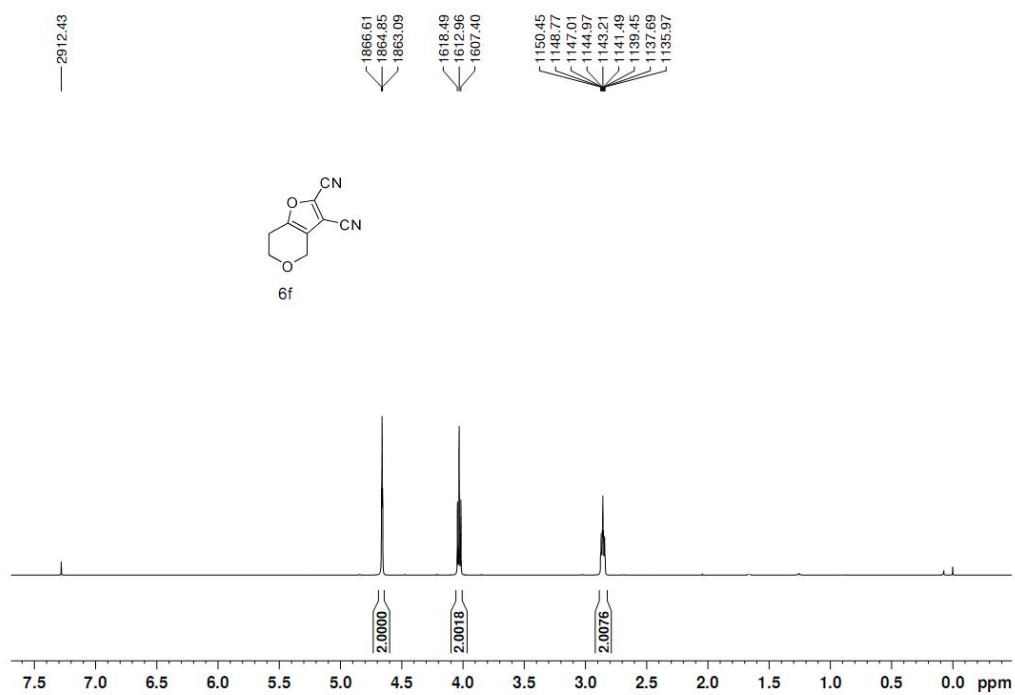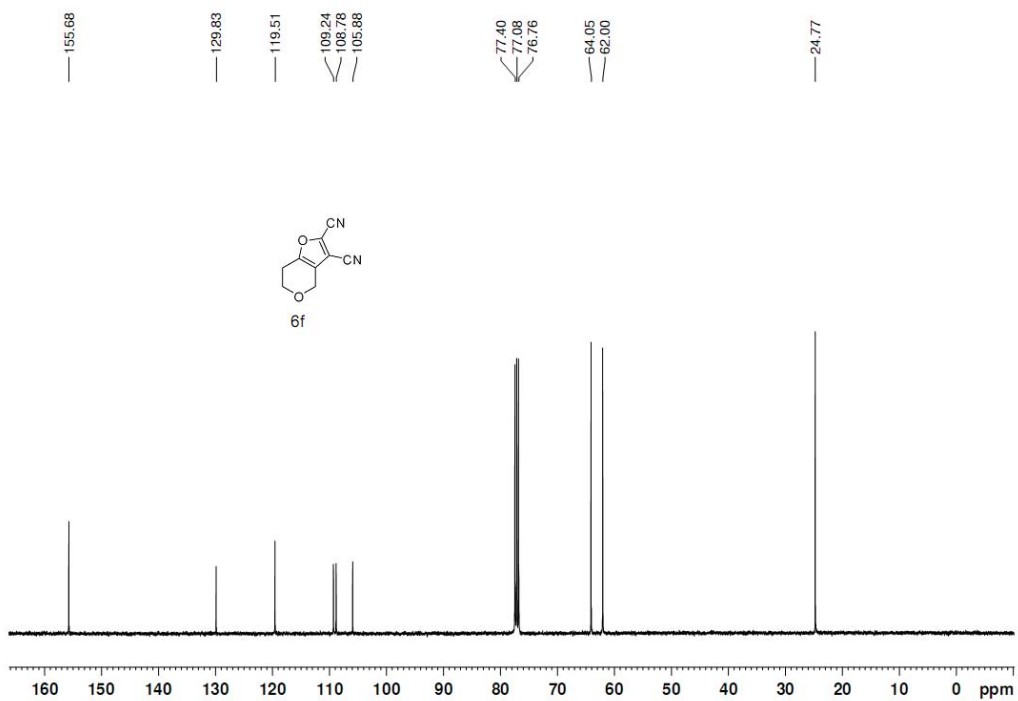

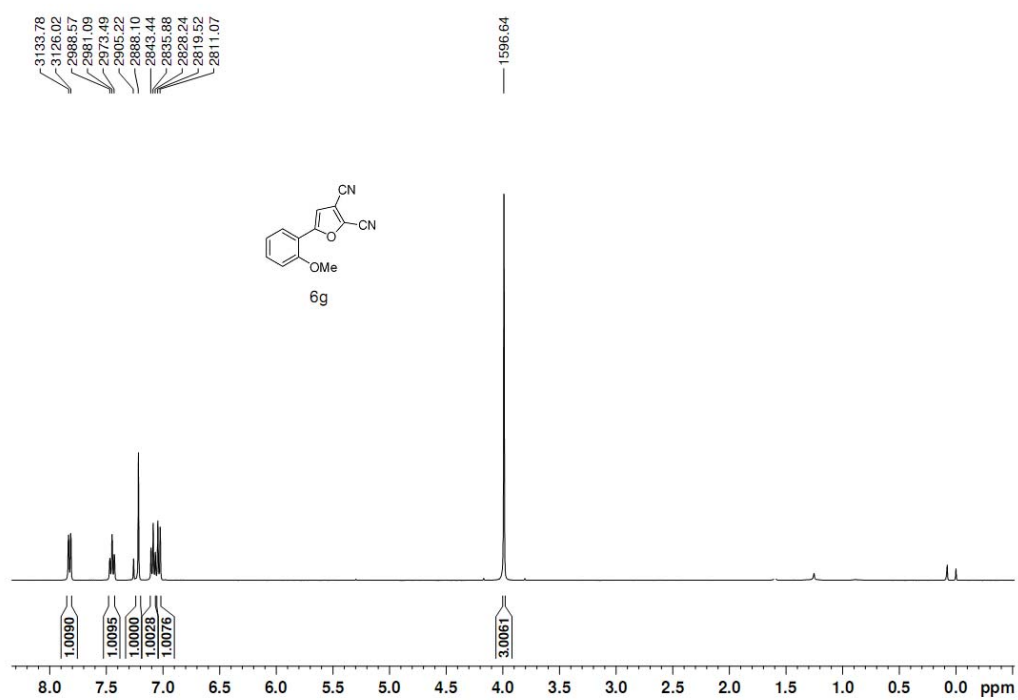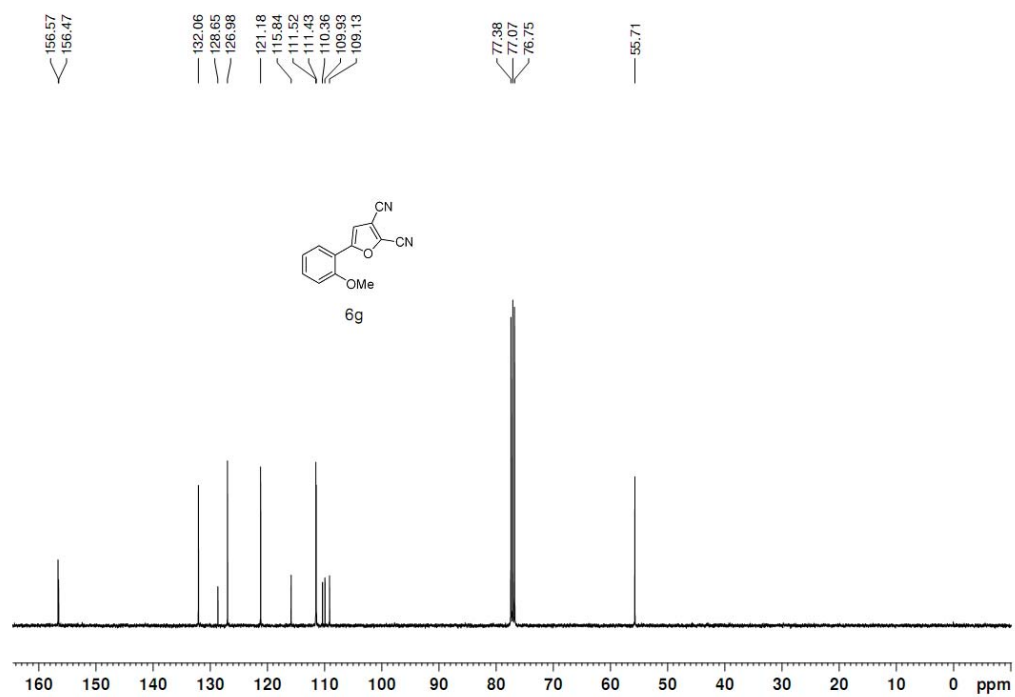

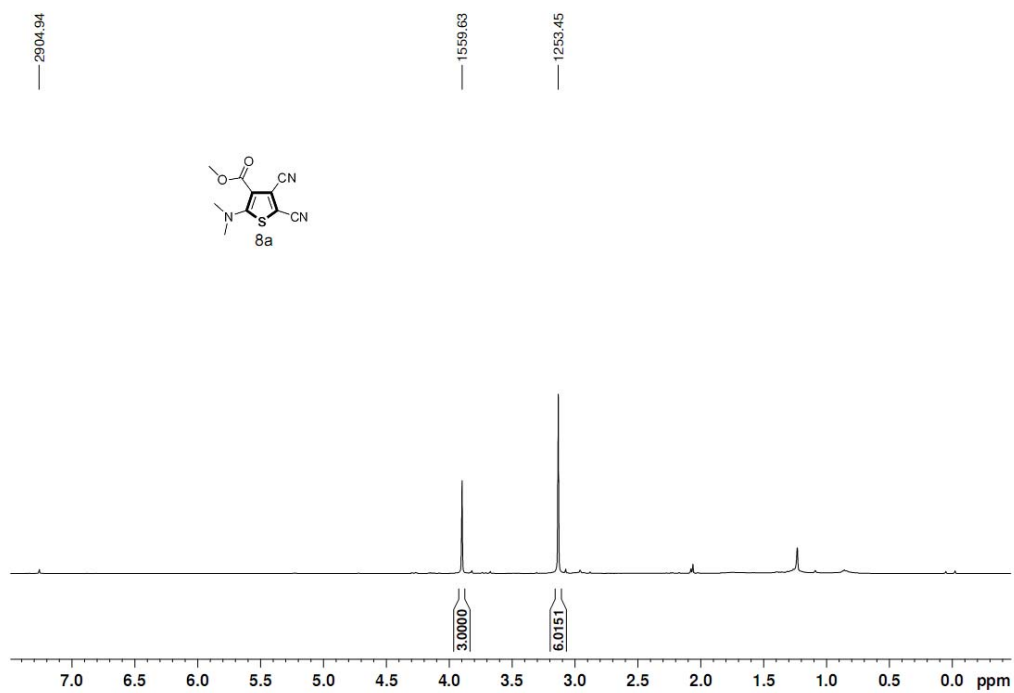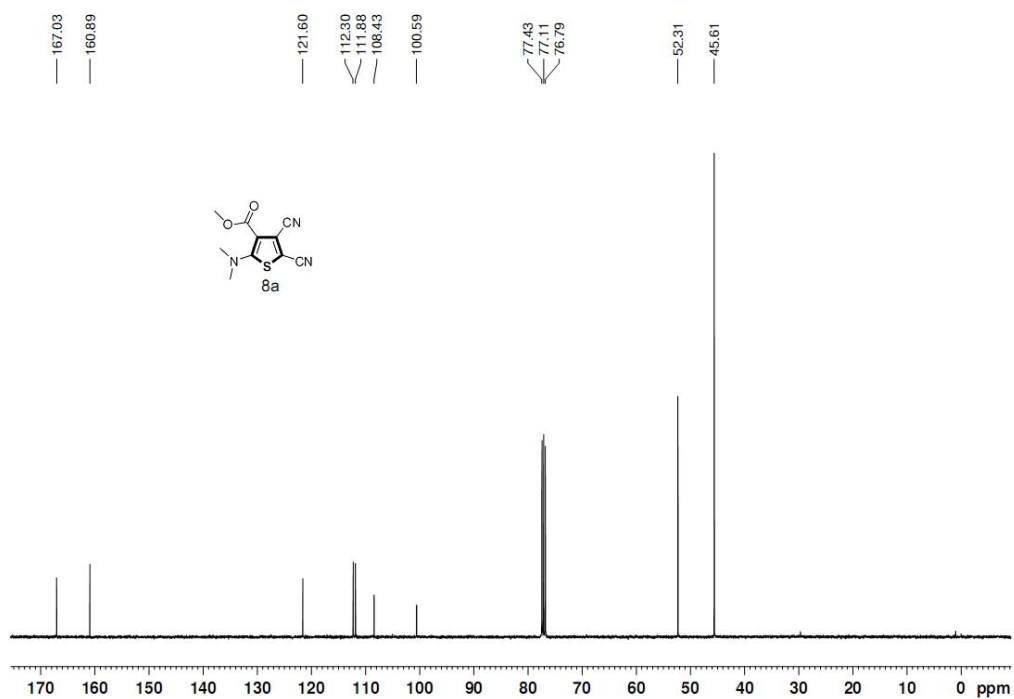

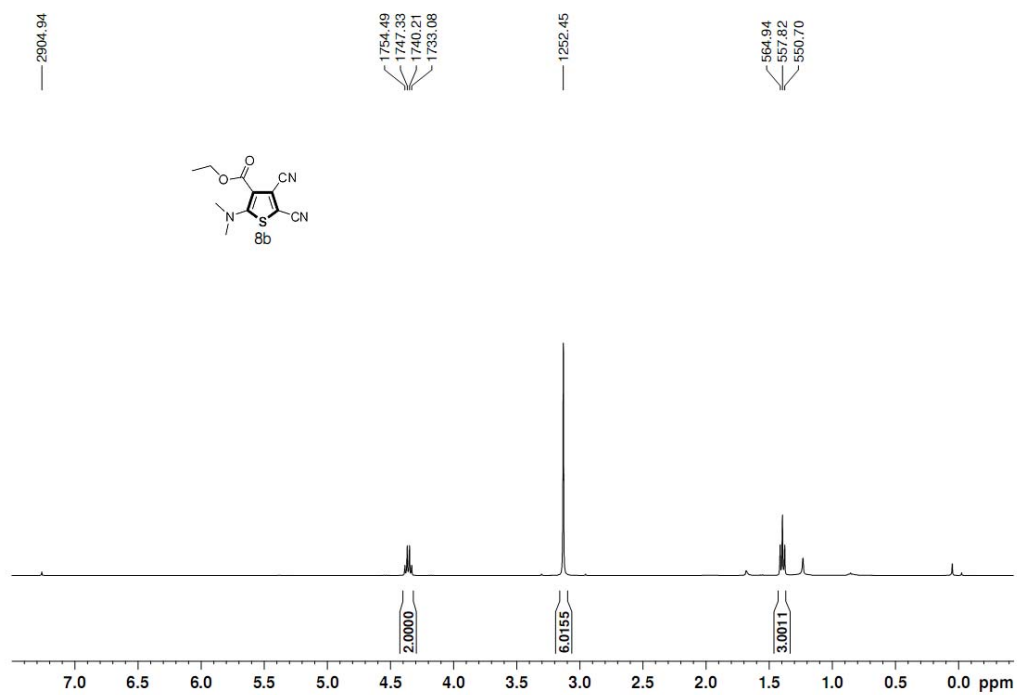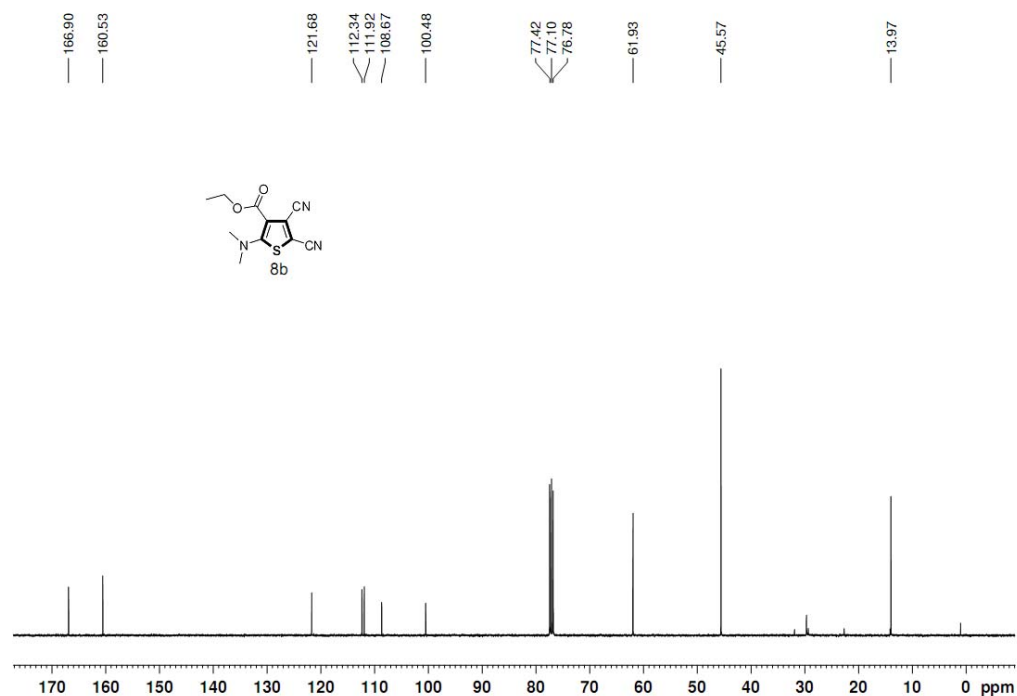

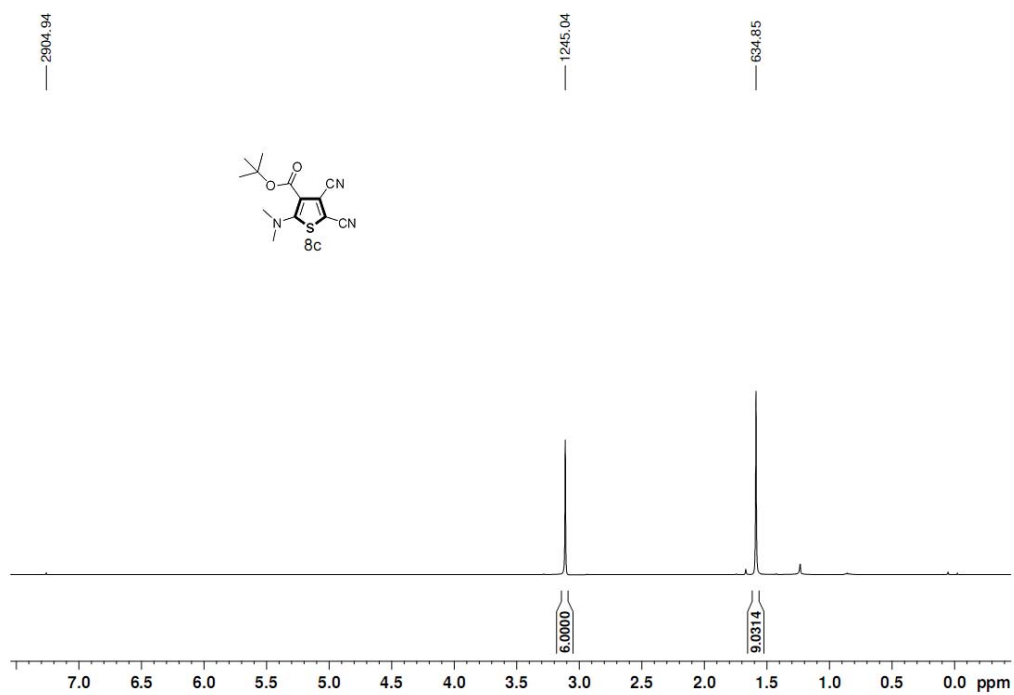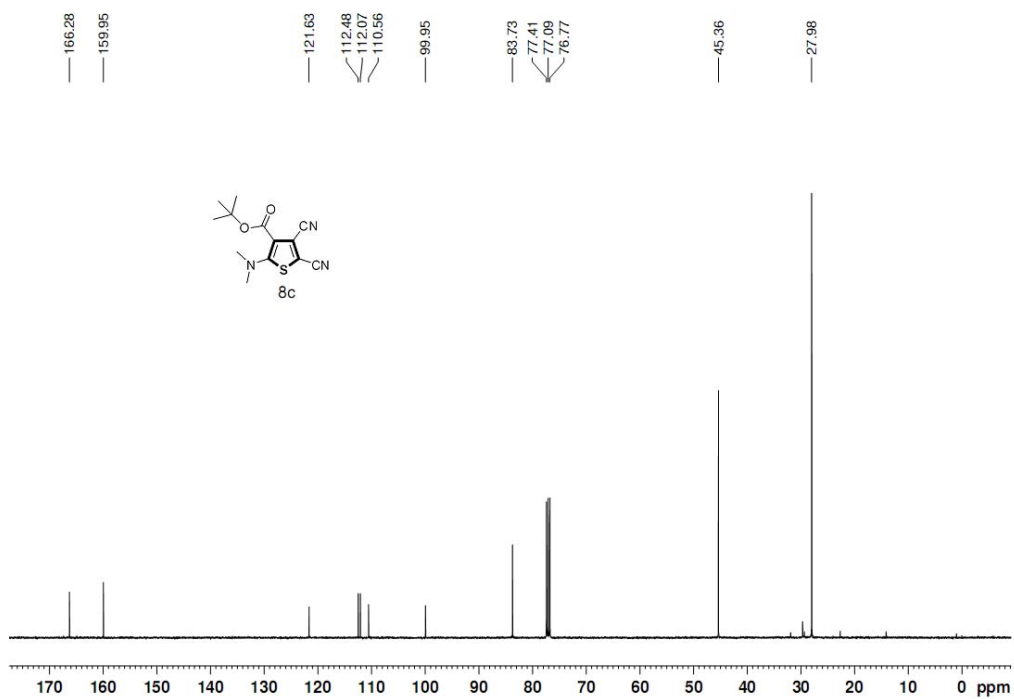

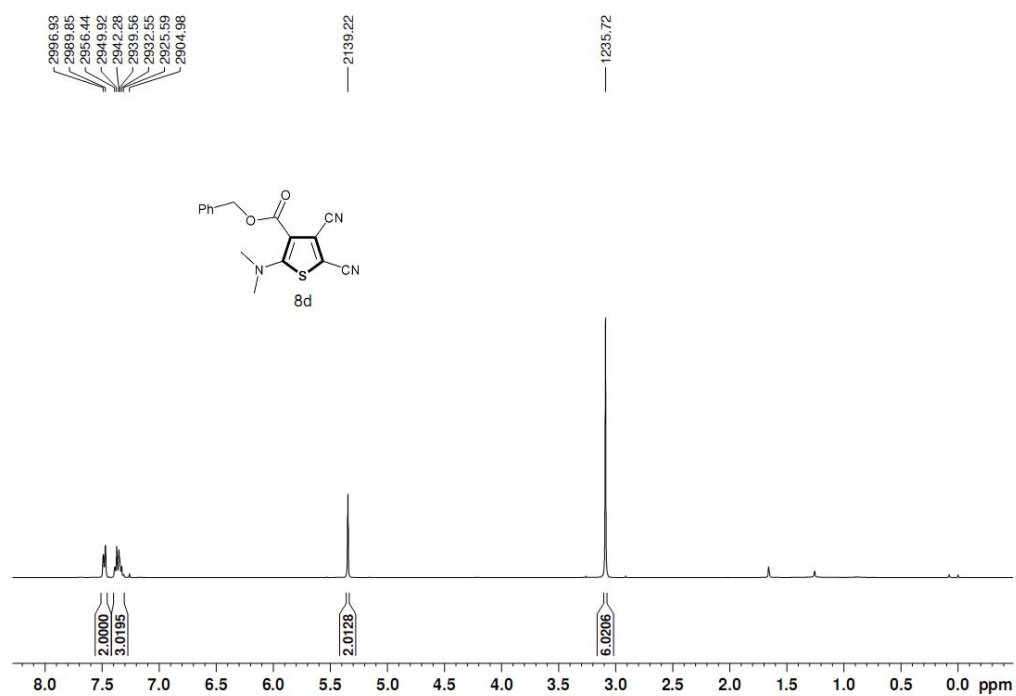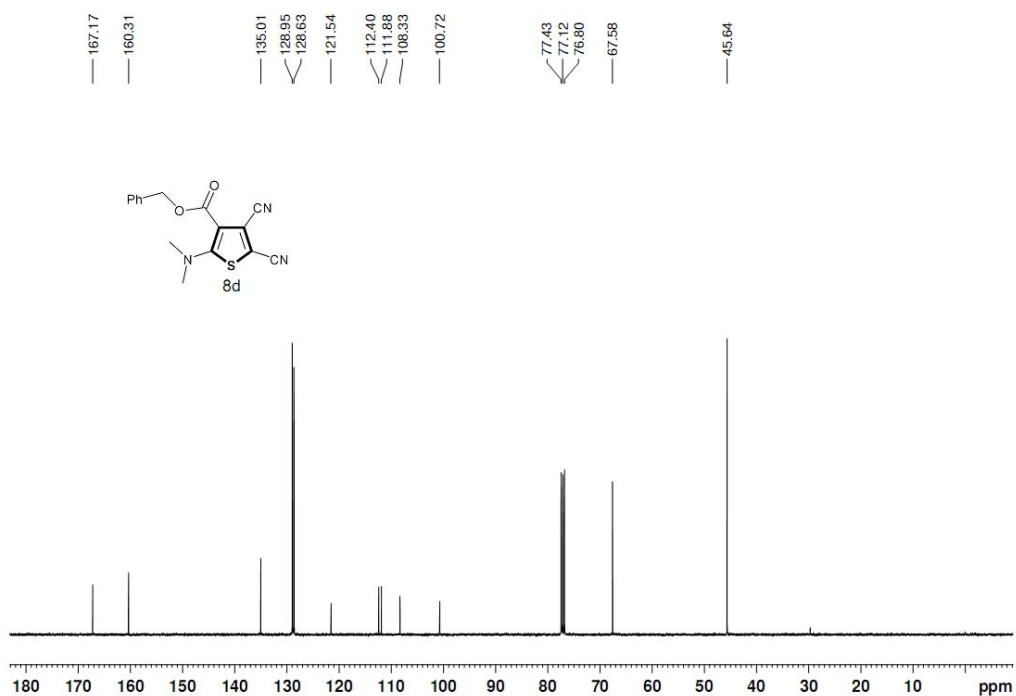

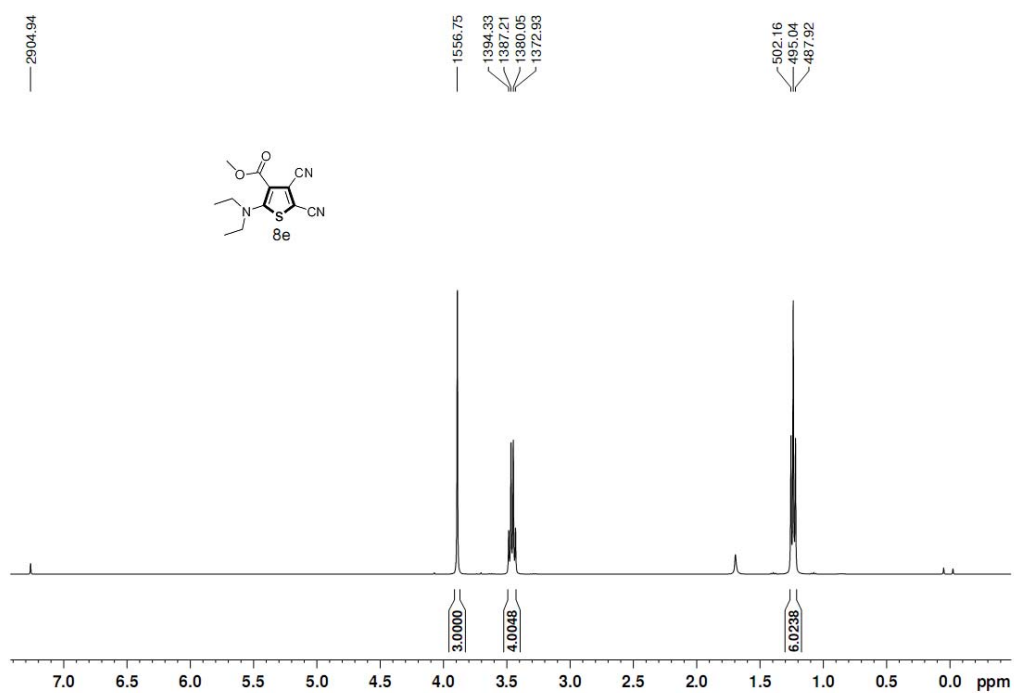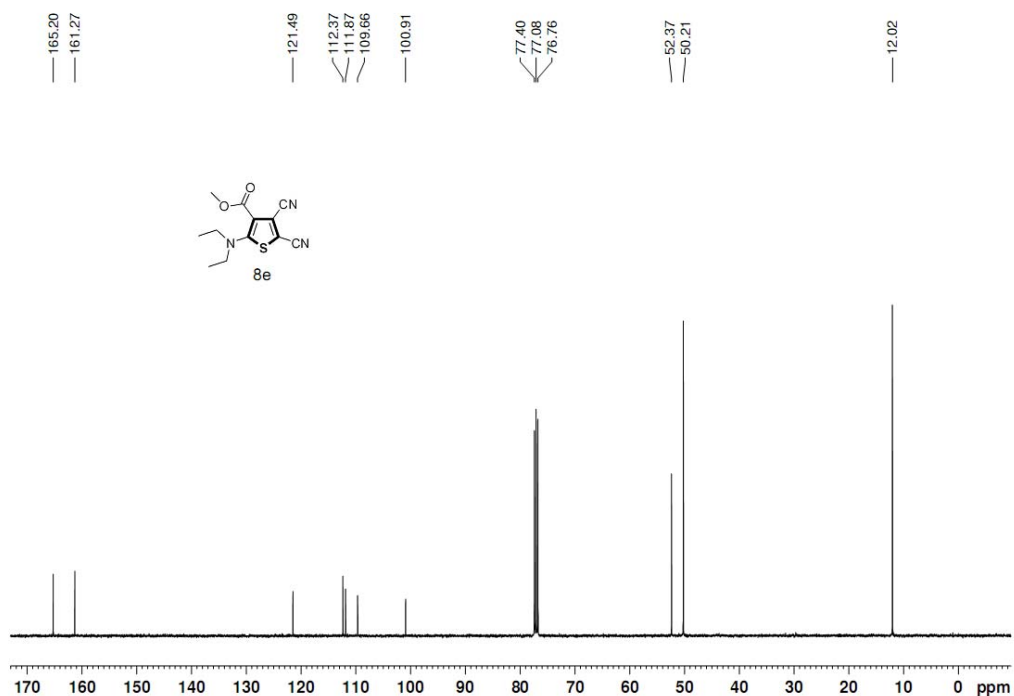

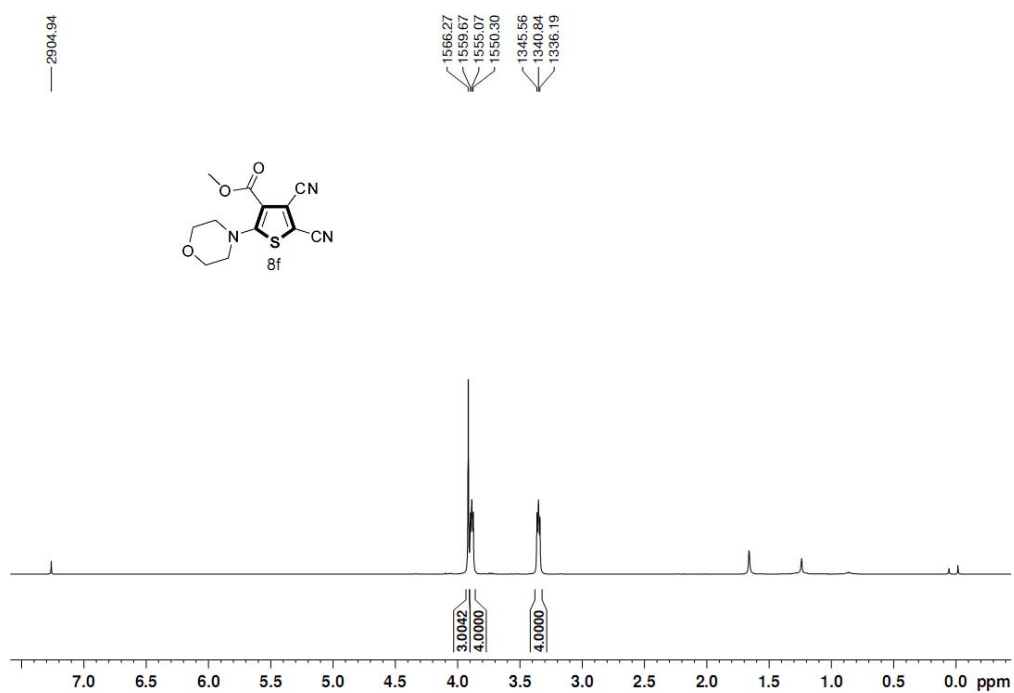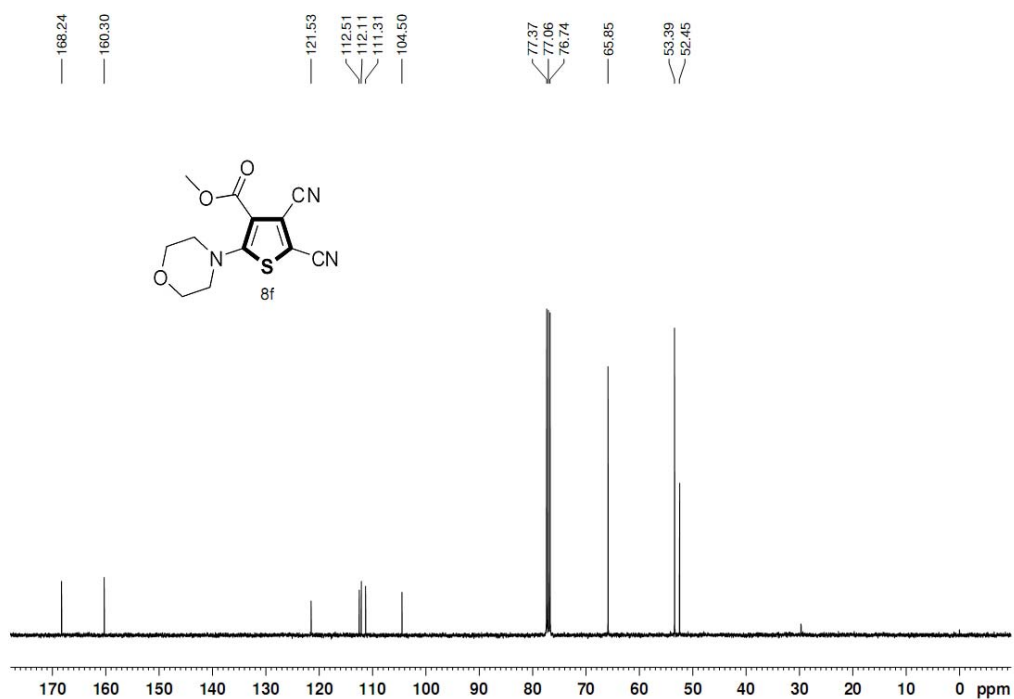

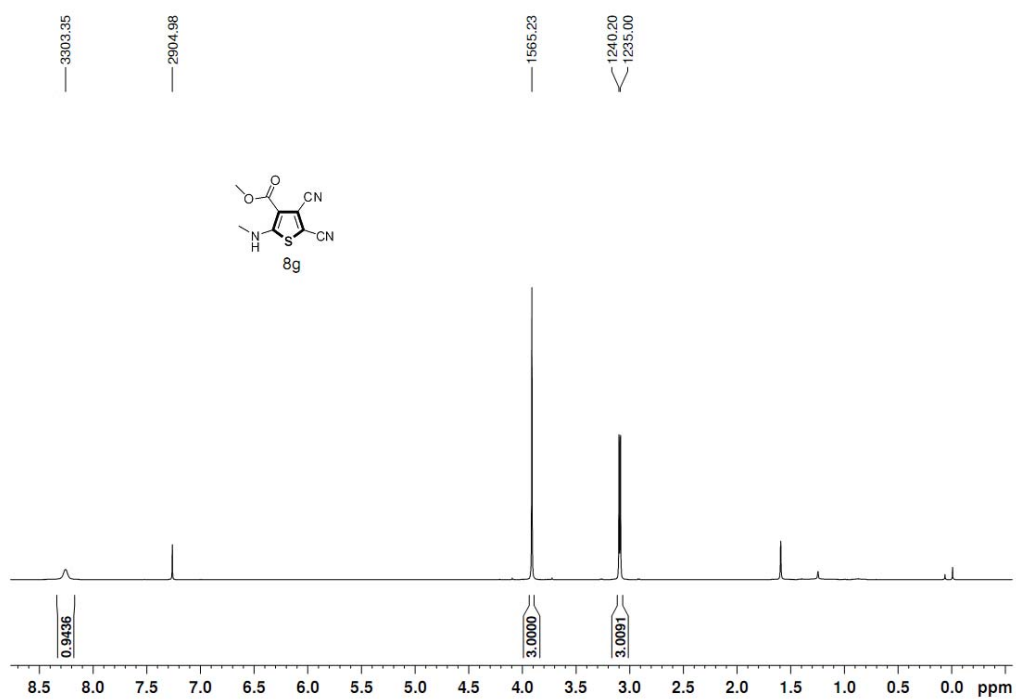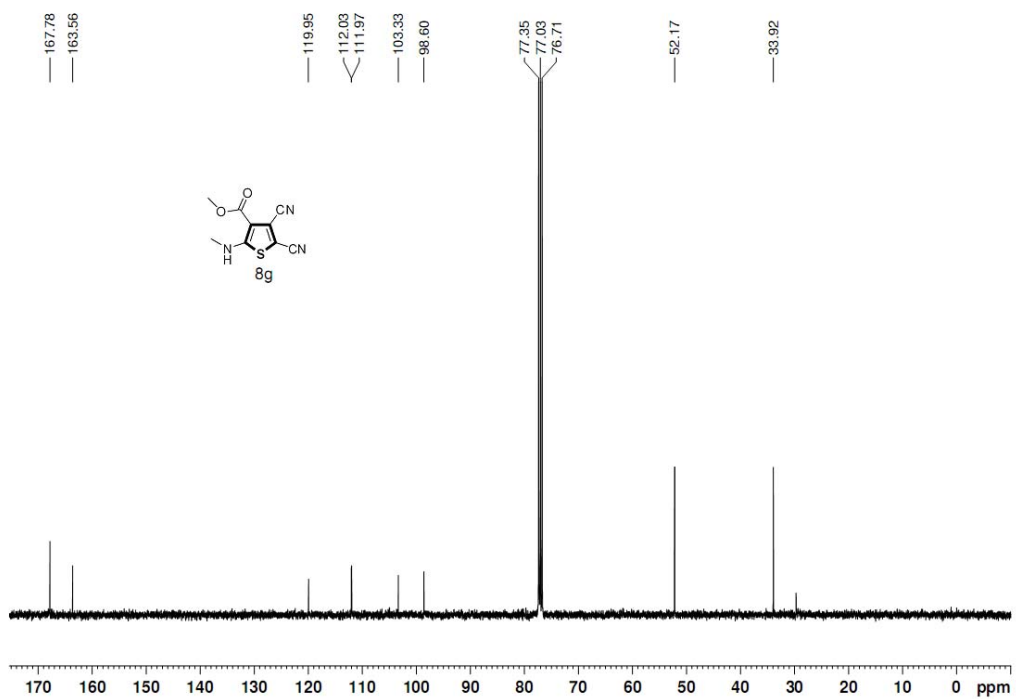

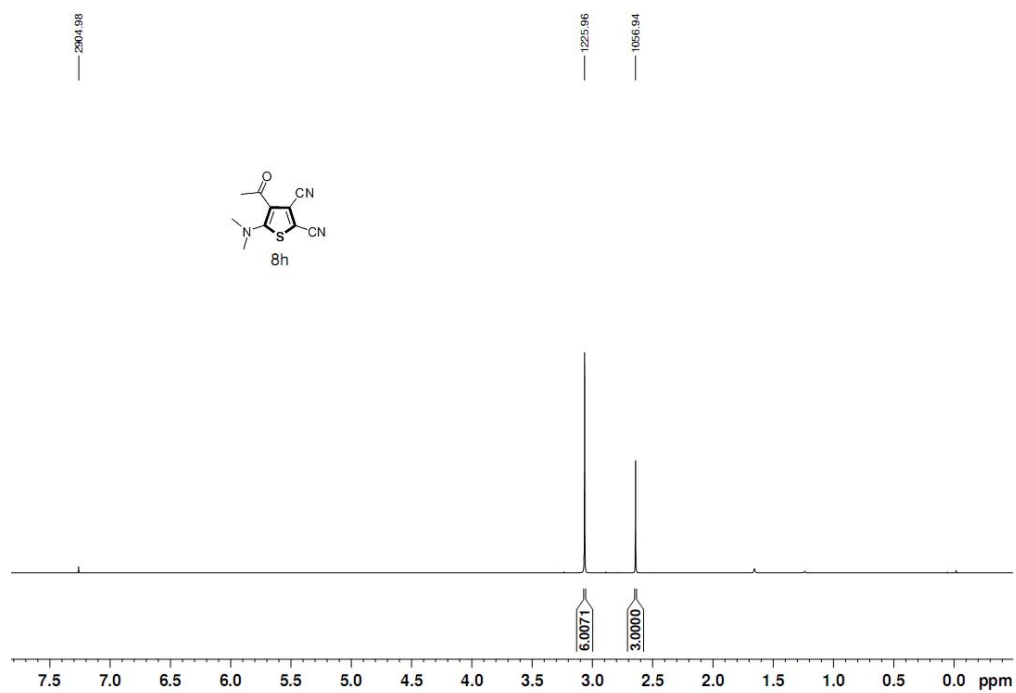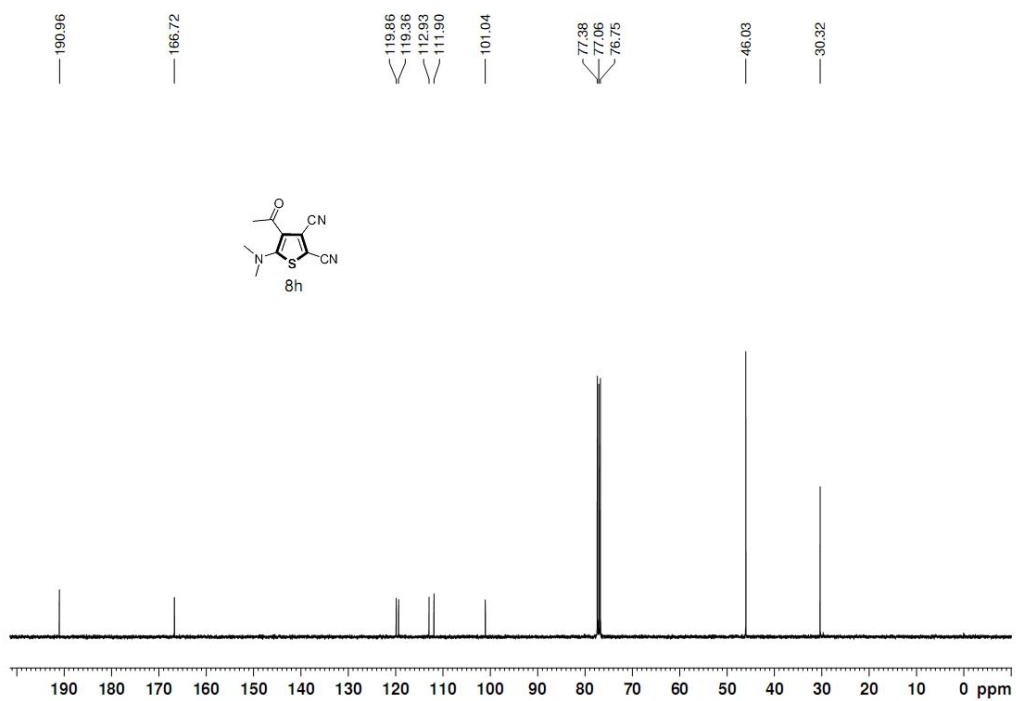

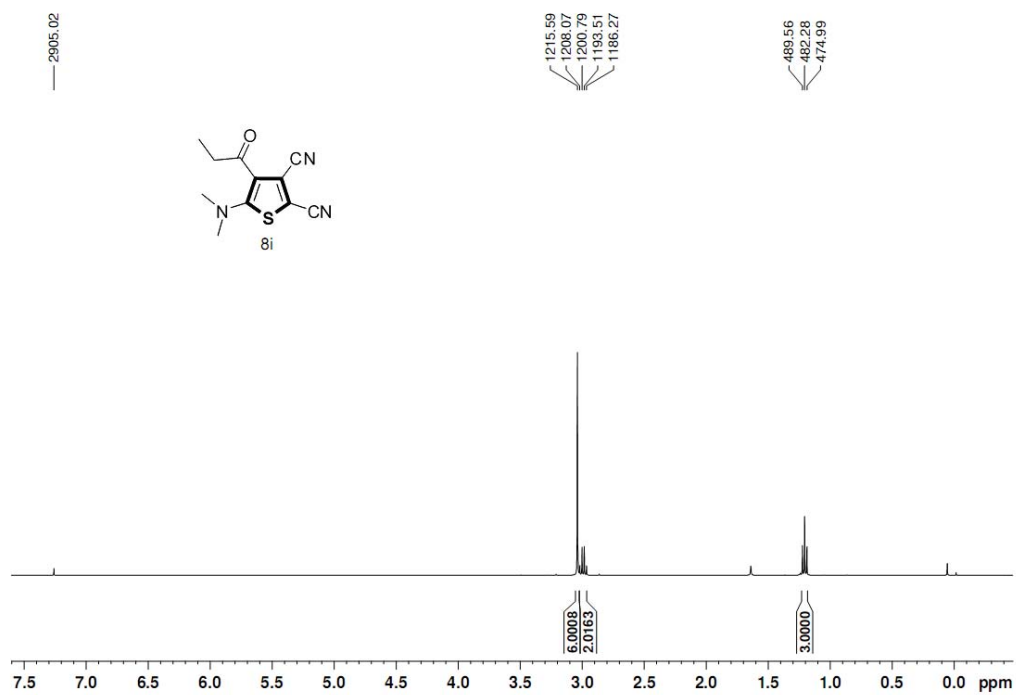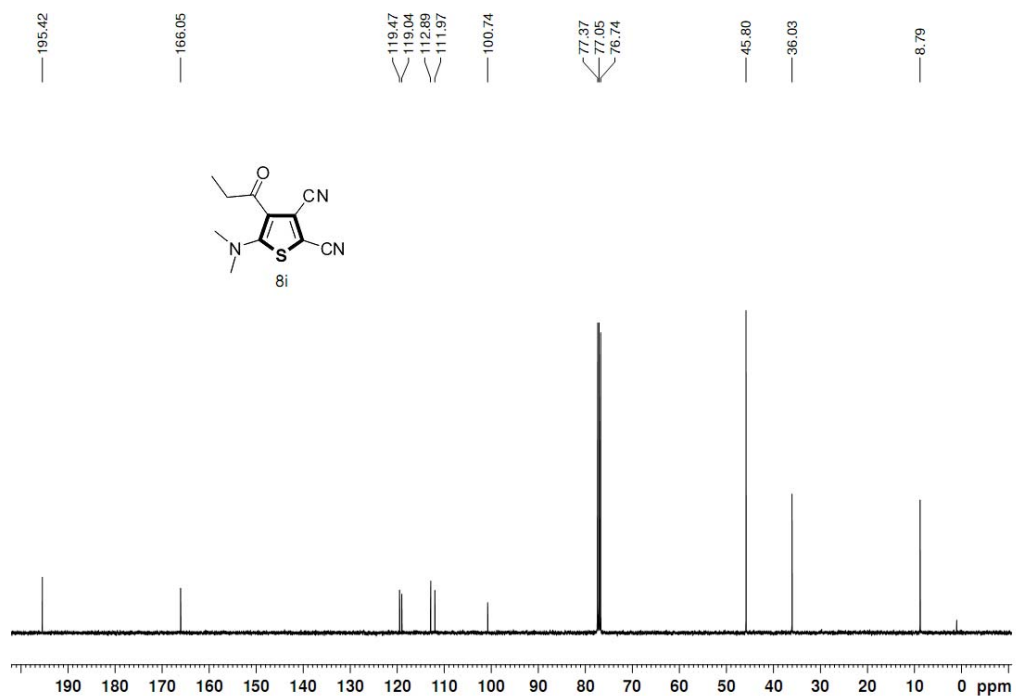

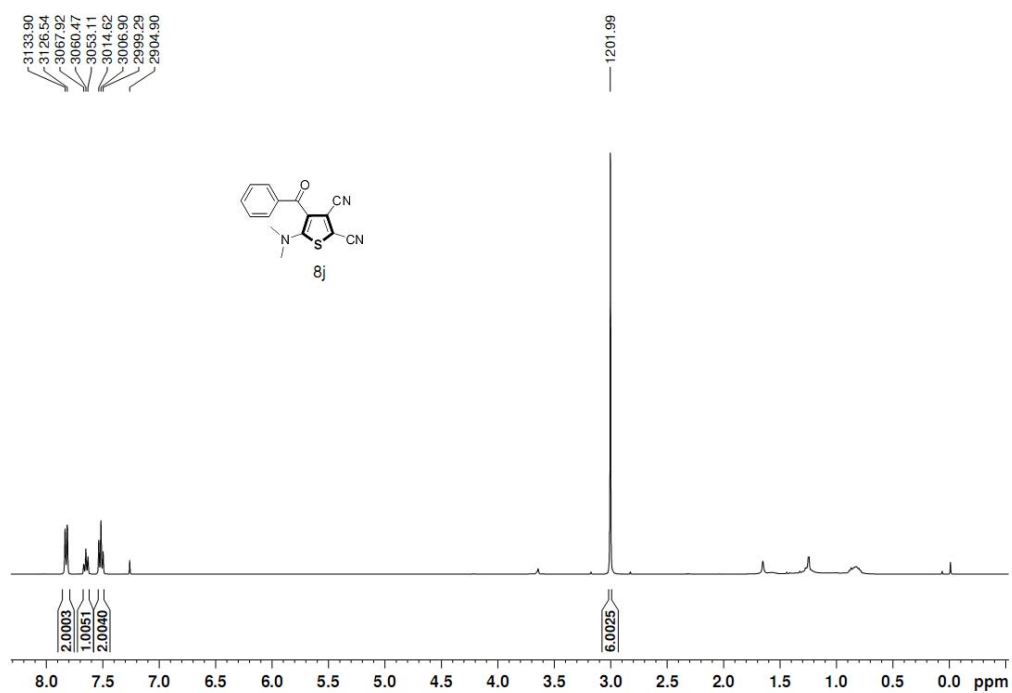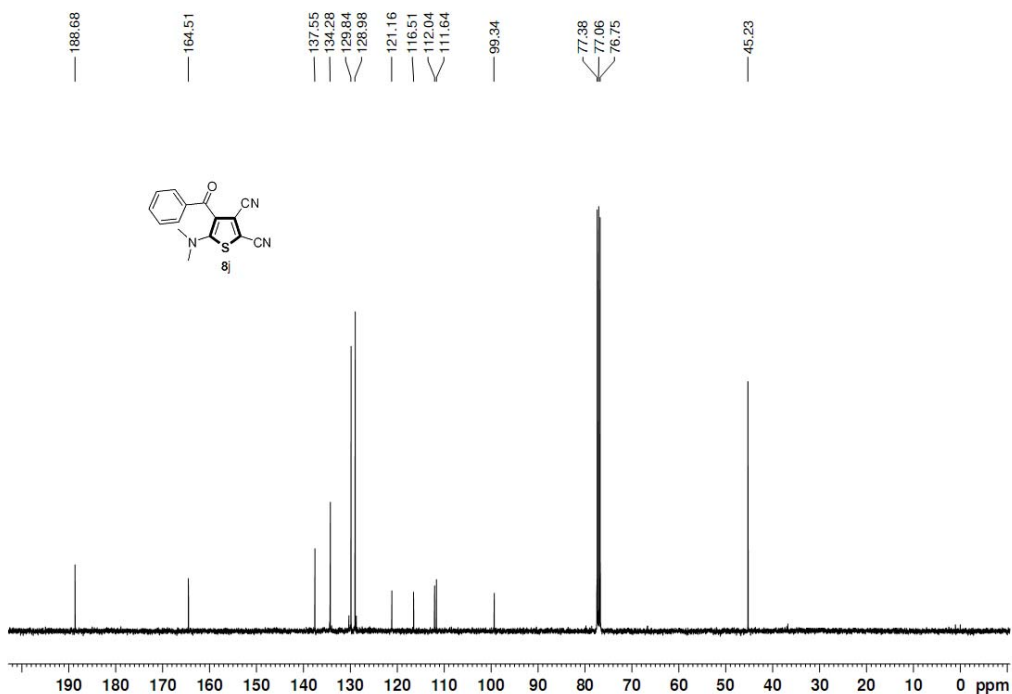

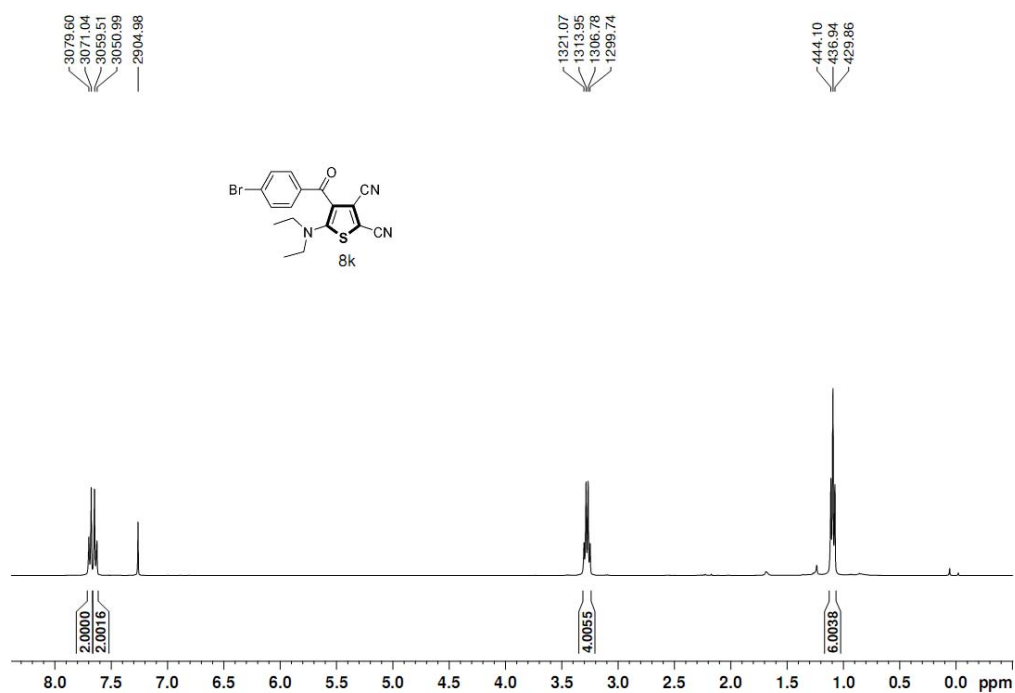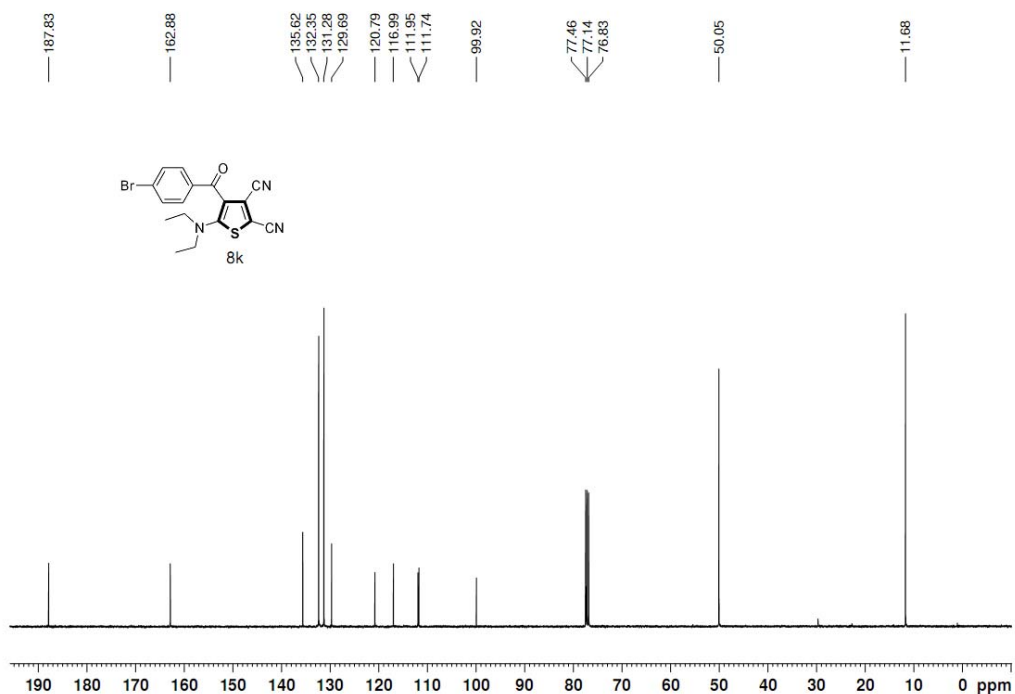

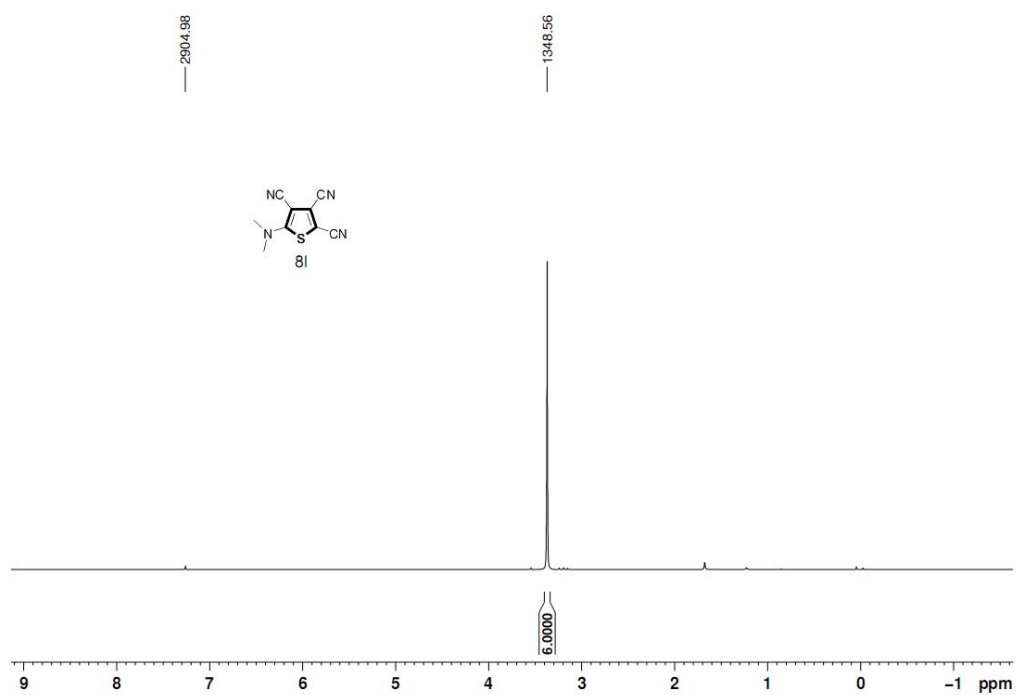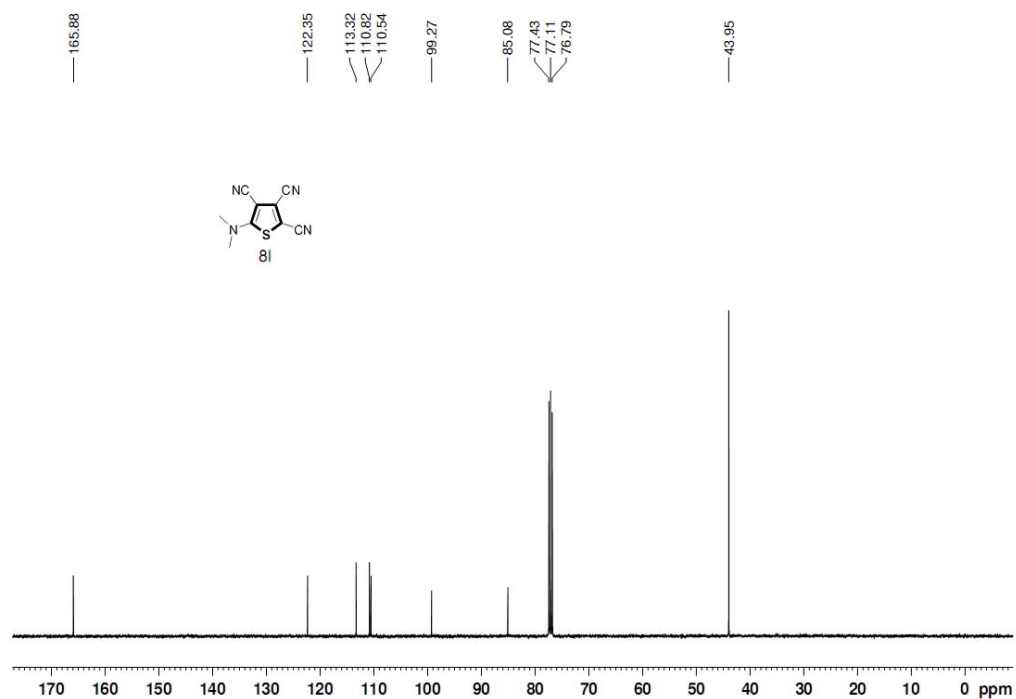

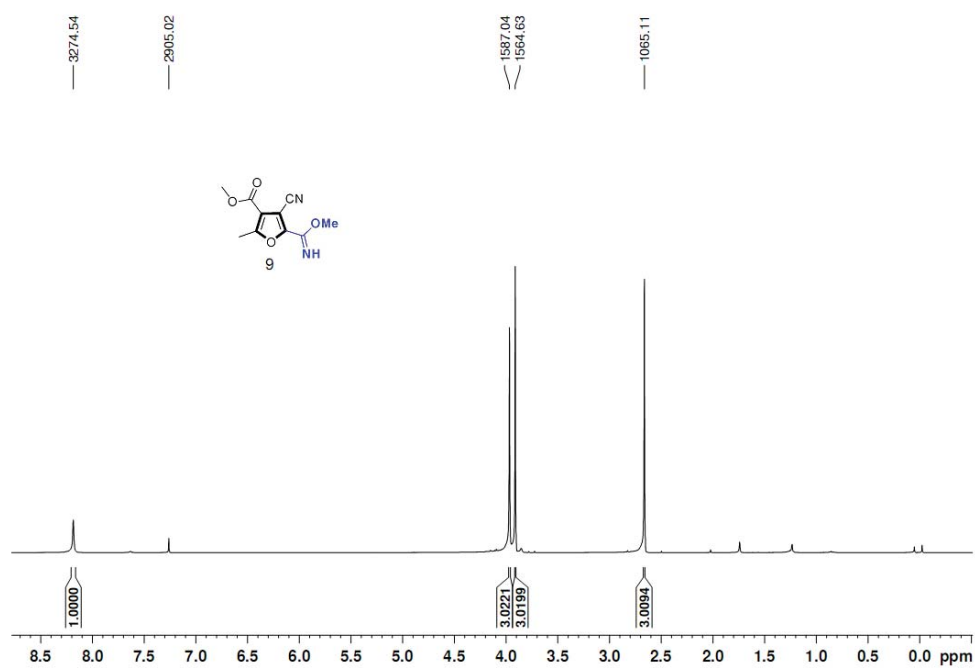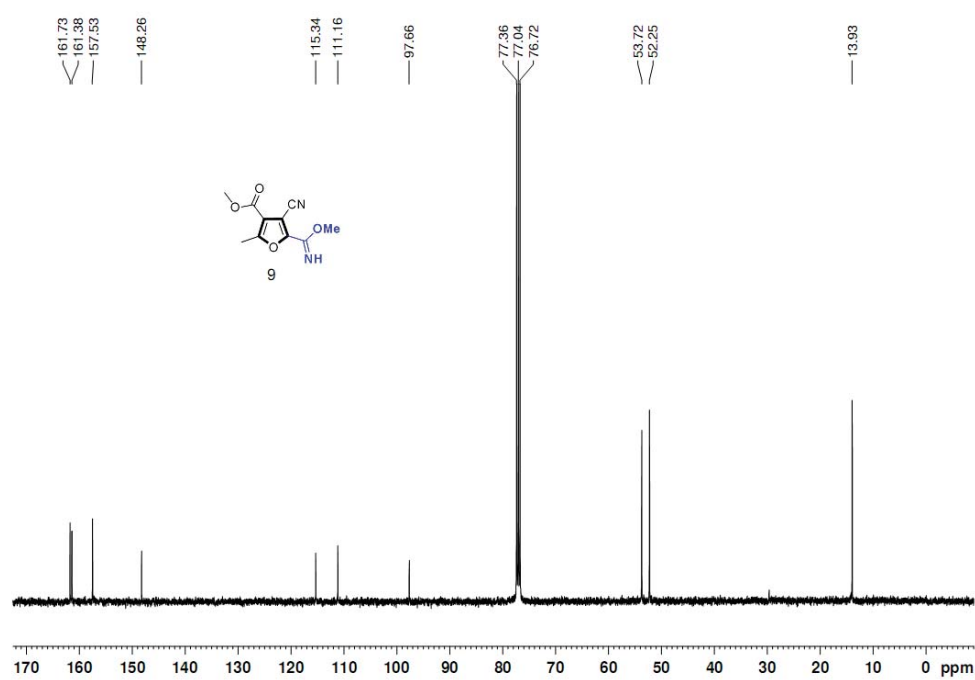

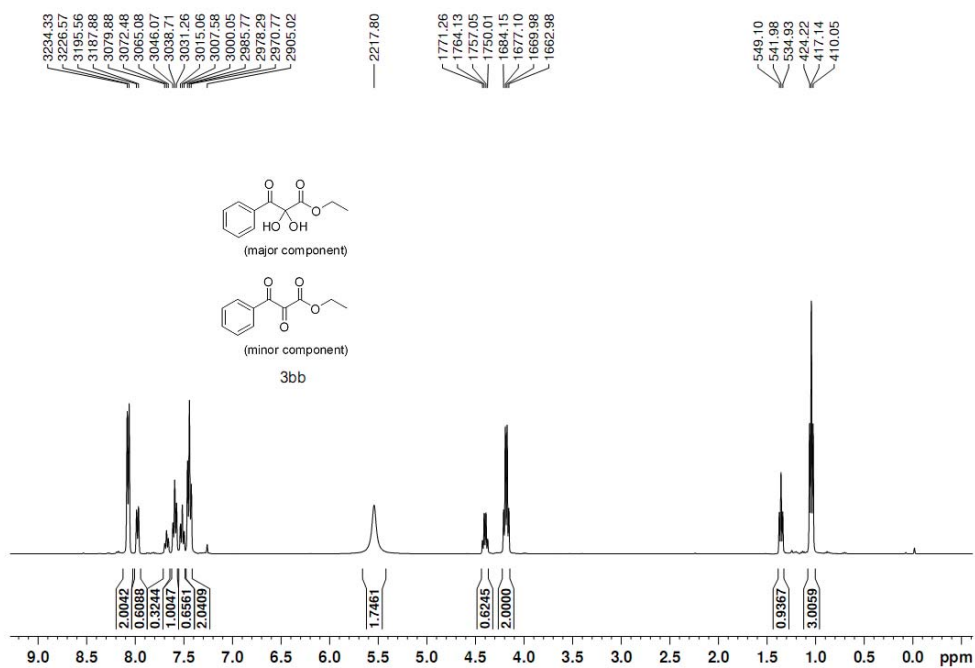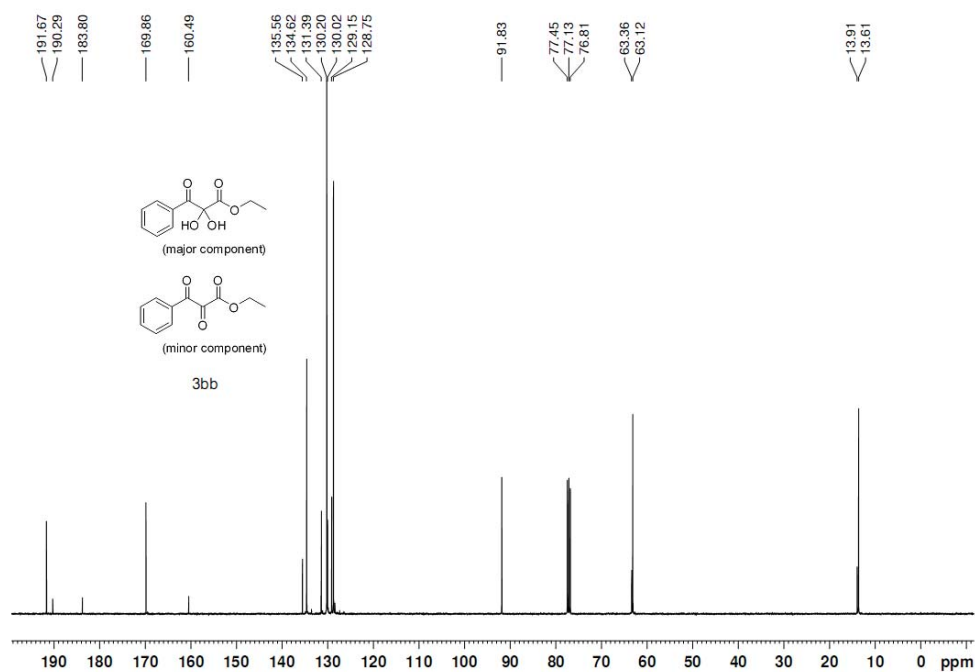

## 6. X-ray structure of **4k**, **8j** and **9** and the corresponding data

CCDC 943604 (**4k**), CCDC 943606 (**8j**) and CCDC 943605 (**9**) contain the supplementary crystallographic data for this paper. These data can be obtained free of charge from the Cambridge Crystallographic Data Centre via [www.ccdc.cam.ac.uk/data\\_request/cif](http://www.ccdc.cam.ac.uk/data_request/cif).

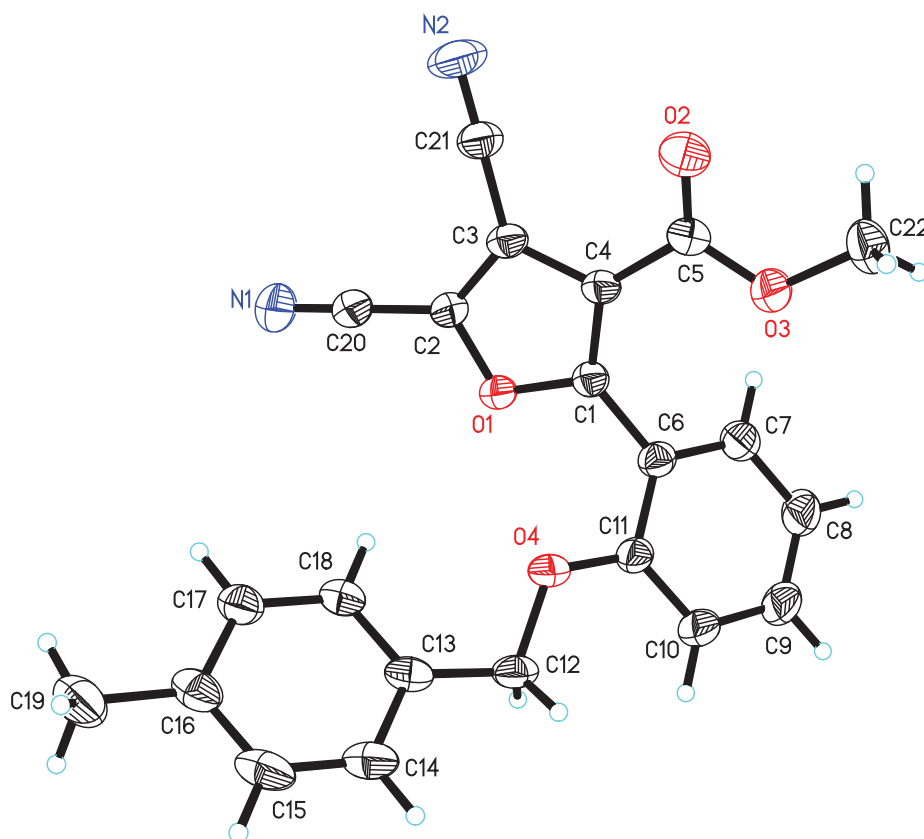

**Figure S11.** X-ray crystal structure of **4k**. Displacement ellipsoids are drawn at the 30% probability level.

### Crystal data and structure refinement for **4k**

The X-ray crystallography data of **4k** are listed below: a colorless monoclinic crystal from n-hexane /ethyl acetate (3:1) was slowly exposed to graphite-monochromated Mo K $\alpha$  irradiation. The structures were solved by direct methods and refined on  $F^2$  using all the reflections.

|                   |                                                               |
|-------------------|---------------------------------------------------------------|
| Empirical formula | C <sub>22</sub> H <sub>16</sub> N <sub>2</sub> O <sub>4</sub> |
| Formula weight    | 372.37                                                        |
| Temperature       | 293 (2) K                                                     |
| Wavelength        | 0.71073 Å                                                     |

|                                      |                                                                                                                                                                                        |
|--------------------------------------|----------------------------------------------------------------------------------------------------------------------------------------------------------------------------------------|
| Crystal system, space group          | Monoclinic, P2 (1)                                                                                                                                                                     |
| Unit cell dimensions                 | $a = 10.7714 (11) \text{ \AA}$ $\alpha = 90 \text{ deg.}$<br>$b = 7.8126(8) \text{ \AA}$ $\beta = 106.574(2) \text{ deg.}$<br>$c = 11.5206(12) \text{ \AA}$ $\gamma = 90 \text{ deg.}$ |
| Volume                               | $929.21 (17) \text{ \AA}^3$                                                                                                                                                            |
| Z, Calculated density                | 2, $1.331 \text{ Mg /m}^3$                                                                                                                                                             |
| Absorption coefficient               | $0.093 \text{ mm}^{-1}$                                                                                                                                                                |
| F (000)                              | 388                                                                                                                                                                                    |
| Crystal size                         | $0.356 \times 0.308 \times 0.257 \text{ mm}$                                                                                                                                           |
| Theta range for data collection      | $1.84 \text{ to } 26.00 \text{ deg.}$                                                                                                                                                  |
| Limiting indices                     | $-13 \leq h \leq 12, -9 \leq k \leq 9, -9 \leq l \leq 14$                                                                                                                              |
| Reflections collected / unique       | 5094 / 3426 [R (int) = 0.0154]                                                                                                                                                         |
| Completeness to $\theta = 26.00$     | 99.3%                                                                                                                                                                                  |
| Absorption correction                | Empirical                                                                                                                                                                              |
| Max. and min. transmission           | 1.00000 and 0.72007                                                                                                                                                                    |
| Refinement method                    | Full-matrix least-squares on $F^2$                                                                                                                                                     |
| Data / restraints / parameters       | 3426 / 2 / 256                                                                                                                                                                         |
| Goodness-of-fit on $F^2$             | 1.067                                                                                                                                                                                  |
| Final R indices [ $I > 2\sigma(I)$ ] | $R1 = 0.0346, wR2 = 0.0943$                                                                                                                                                            |
| R indices (all data)                 | $R1 = 0.0387, wR2 = 0.0977$                                                                                                                                                            |
| Absolute structure parameter         | 1.7 (9)                                                                                                                                                                                |
| Extinction coefficient               | $0.106(7)$                                                                                                                                                                             |
| Largest diff. peak and hole          | $0.125 \text{ and } -0.132 \text{ e. \AA}^{-3}$                                                                                                                                        |

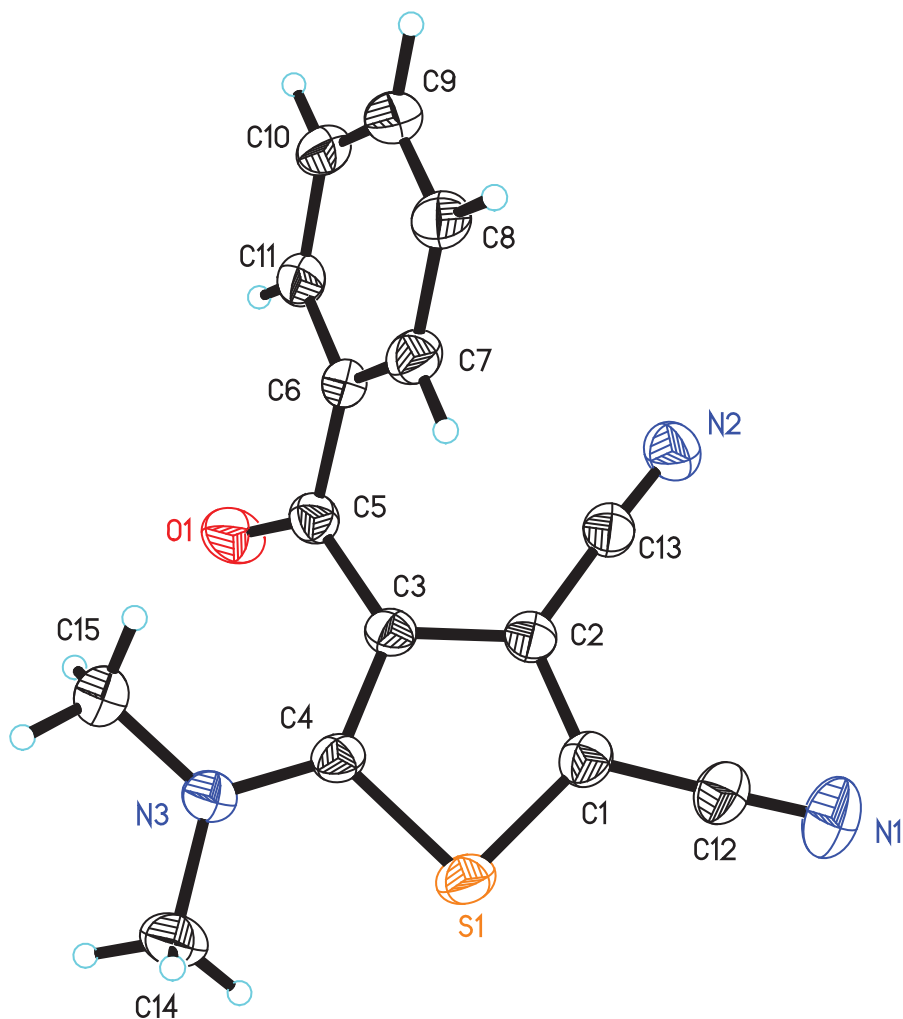

**Figure S12.** X-ray crystal structure of **8j**. Displacement ellipsoids are drawn at the 30% probability level.

#### Crystal data and structure refinement for **8j**

The X-ray crystallography data of **8j** are listed below: a yellowish monoclinic crystal from n-hexane /ethyl acetate/dichloroform (1:1:1) was slowly exposed to graphite-monochromated Mo K $\alpha$  irradiation. The structures were solved by direct methods and refined on  $F^2$  using all the reflections.

|                   |                                                   |
|-------------------|---------------------------------------------------|
| Empirical formula | C <sub>15</sub> H <sub>11</sub> N <sub>3</sub> OS |
| Formula weight    | 281.33                                            |
| Temperature       | 293 (2) K                                         |

|                                      |                                                                                                                               |
|--------------------------------------|-------------------------------------------------------------------------------------------------------------------------------|
| Wavelength                           | 0.71073 Å                                                                                                                     |
| Crystal system, space group          | Monoclinic, P2(1)/c                                                                                                           |
| Unit cell dimensions                 | $a = 8.1738(11)$ Å $\alpha = 90$ deg.<br>$b = 21.296(3)$ Å $\beta = 109.477(3)$ deg.<br>$c = 8.4023(11)$ Å $\gamma = 90$ deg. |
| Volume                               | $1378.9(3)$ Å <sup>3</sup>                                                                                                    |
| Z, Calculated density                | 4, 1.355 Mg /m <sup>3</sup>                                                                                                   |
| Absorption coefficient               | $0.233 \text{ mm}^{-1}$                                                                                                       |
| F (000)                              | 584                                                                                                                           |
| Crystal size                         | $0.212 \times 0.154 \times 0.112$ mm                                                                                          |
| Theta range for data collection      | $1.91$ to $25.50$ deg.                                                                                                        |
| Limiting indices                     | $-9 \leq h \leq 8$ , $-25 \leq k \leq 25$ , $-9 \leq l \leq 10$                                                               |
| Reflections collected / unique       | 7757 / 2567 [R (int) = 0.0563]                                                                                                |
| Completeness to $\theta = 25.50$     | 100.0 %                                                                                                                       |
| Absorption correction                | Empirical                                                                                                                     |
| Max. and min. transmission           | 1.00000 and 0.20751                                                                                                           |
| Refinement method                    | Full-matrix least-squares on $F^2$                                                                                            |
| Data / restraints / parameters       | 2567 / 0 / 184                                                                                                                |
| Goodness-of-fit on $F^2$             | 1.068                                                                                                                         |
| Final R indices [ $I > 2\sigma(I)$ ] | $R1 = 0.0573$ , $wR2 = 0.1382$                                                                                                |
| R indices (all data)                 | $R1 = 0.0635$ , $wR2 = 0.1445$                                                                                                |
| Extinction coefficient               | $0.046(5)$                                                                                                                    |
| Largest diff. peak and hole          | $0.343$ and $-0.370$ e. Å <sup>-3</sup>                                                                                       |

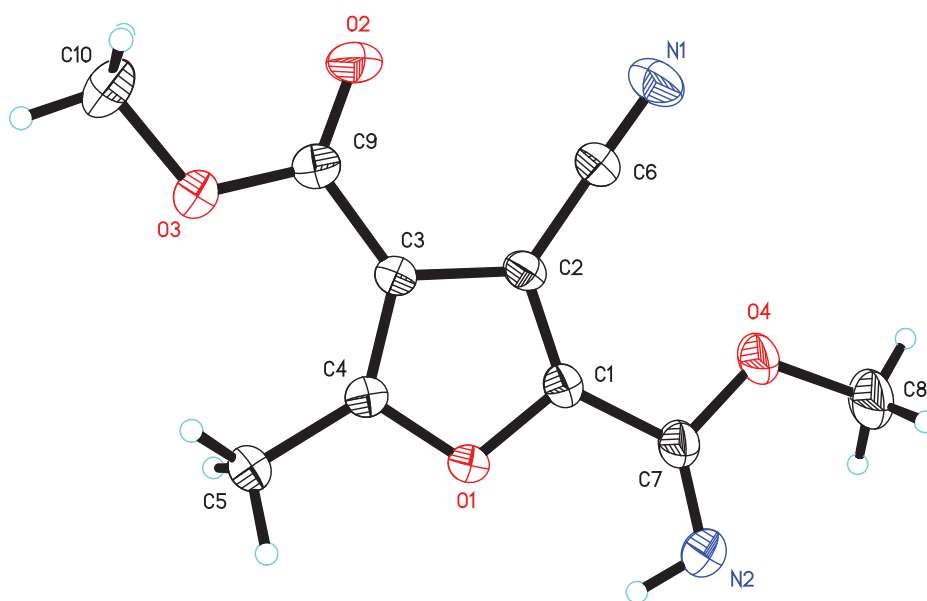

**Figure S13.** X-ray crystal structure of **9**. Displacement ellipsoids are drawn at the 30% probability level.

#### Crystal data and structure refinement for **9**

The X-ray crystallography data of **9** are listed below: a colorless Triclinic crystal from n-hexane /ethyl acetate (1:1) was slowly exposed to graphite-monochromated Mo K $\alpha$  irradiation. The structures were solved by direct methods and refined on  $F^2$  using all the reflections.

|                                 |                                                  |                            |
|---------------------------------|--------------------------------------------------|----------------------------|
| Empirical formula               | $\text{C}_{10}\text{H}_{10}\text{N}_2\text{O}_4$ |                            |
| Formula weight                  | 222.20                                           |                            |
| Temperature                     | 293 (2) K                                        |                            |
| Wavelength                      | 0.71073 Å                                        |                            |
| Crystal system, space group     | Triclinic, P-1                                   |                            |
| Unit cell dimensions            | $a = 7.107$ (2) Å                                | $\alpha = 75.924$ (5) deg. |
|                                 | $b = 7.758$ (2) Å                                | $\beta = 79.636$ (6) deg.  |
|                                 | $c = 10.620$ (3) Å                               | $\gamma = 71.112$ (6) deg. |
| Volume                          | $534.1$ (3) Å <sup>3</sup>                       |                            |
| Z, Calculated density           | 2, 1.382 Mg /m <sup>3</sup>                      |                            |
| Absorption coefficient          | $0.109$ mm <sup>-1</sup>                         |                            |
| F (000)                         | 232                                              |                            |
| Crystal size                    | $0.254 \times 0.187 \times 0.076$ mm             |                            |
| Theta range for data collection | 1.99 to 25.50 deg.                               |                            |

|                                   |                                             |
|-----------------------------------|---------------------------------------------|
| Limiting indices                  | -8<=h<=8, -9<=k<=9, -12<=l<=11              |
| Reflections collected / unique    | 3047 / 1965 [R (int) = 0.0251]              |
| Completeness to theta = 25.50     | 98.4%                                       |
| Absorption correction             | Empirical                                   |
| Max. and min. transmission        | 1.00000 and 0.30135                         |
| Refinement method                 | Full-matrix least-squares on F <sup>2</sup> |
| Data / restraints / parameters    | 1965 / 1 / 153                              |
| Goodness-of-fit on F <sup>2</sup> | 1.080                                       |
| Final R indices [I>2sigma (I)]    | R1 = 0.0690, wR2 = 0.1963                   |
| R indices (all data)              | R1 = 0.0823, wR2 = 0.2092                   |
| Extinction coefficient            | 0.065(17)                                   |
| Largest diff. peak and hole       | 0.318 and -0.327 e. Å <sup>-3</sup>         |
